# Supplementary material for: Value of KPNA4 as a diagnostic and prognostic biomarker for hepatocellular carcinoma
Source: Aging (Albany NY). 2021 Feb 1;13(4):5263–83. doi: 10.18632/aging.202447 (PMC7950262; doi:10.18632/aging.202447)
Supplement: Supplementary Table 2 [file aging-13-202447-s003.xlsx]

## Sheet: gProfiler_hsapiens
Supplementary Table 2. Enrichment analysis of KPNA4 and its frequently altered neighboring genes.
source	term_name	term_id	adjusted_p_value	negative_log10_of_adjusted_p_value	term_size	query_size	intersection_size	effective_domain_size	intersections
GO:MF	structural constituent of nuclear pore	GO:0017056	2.46984e-44	43.6073	28	29	18	18098	NUP107,NUP133,NUP153,NUP155,NUP160,NUP188,NUP205,NUP214,NUP35,NUP54,NUP58,NUP62,NUP85,NUP88,NUP93,NUP98,POM121,TPR
GO:MF	structural molecule activity	GO:0005198	1.62808e-17	16.7883	739	29	19	18098	NUP107,NUP133,NUP153,NUP155,NUP160,NUP188,NUP205,NUP214,NUP35,NUP54,NUP58,NUP62,NUP85,NUP88,NUP93,NUP98,POM121,SEH1L,TPR
GO:MF	nuclear localization sequence binding	GO:0008139	4.72671e-10	9.32544	24	29	6	18098	KPNA5,NUP153,NUP214,NUP58,NUP98,POM121
GO:MF	signal sequence binding	GO:0005048	2.79557e-08	7.55353	45	29	6	18098	KPNA5,NUP153,NUP214,NUP58,NUP98,POM121
GO:MF	nucleocytoplasmic carrier activity	GO:0140142	0.00129528	2.88764	19	29	3	18098	KPNA4,KPNA5,NUP214
GO:MF	peptide binding	GO:0042277	0.0020585	2.68645	290	29	6	18098	KPNA5,NUP153,NUP214,NUP58,NUP98,POM121
GO:MF	amide binding	GO:0033218	0.0058177	2.23525	348	29	6	18098	KPNA5,NUP153,NUP214,NUP58,NUP98,POM121
GO:MF	nuclear import signal receptor activity	GO:0061608	0.0406917	1.39049	10	29	2	18098	KPNA4,KPNA5
GO:BP	tRNA export from nucleus	GO:0006409	1.57654e-70	69.8023	34	29	26	17816	AAAS,NUP107,NUP133,NUP153,NUP155,NUP160,NUP188,NUP205,NUP210,NUP214,NUP35,NUP37,NUP43,NUP50,NUP54,NUP58,NUP62,NUP85,NUP88,NUP93,NUP98,POM121,RAE1,RANBP2,SEH1L,TPR
GO:BP	tRNA-containing ribonucleoprotein complex export from nucleus	GO:0071431	1.57654e-70	69.8023	34	29	26	17816	AAAS,NUP107,NUP133,NUP153,NUP155,NUP160,NUP188,NUP205,NUP210,NUP214,NUP35,NUP37,NUP43,NUP50,NUP54,NUP58,NUP62,NUP85,NUP88,NUP93,NUP98,POM121,RAE1,RANBP2,SEH1L,TPR
GO:BP	tRNA transport	GO:0051031	2.20644e-69	68.6563	36	29	26	17816	AAAS,NUP107,NUP133,NUP153,NUP155,NUP160,NUP188,NUP205,NUP210,NUP214,NUP35,NUP37,NUP43,NUP50,NUP54,NUP58,NUP62,NUP85,NUP88,NUP93,NUP98,POM121,RAE1,RANBP2,SEH1L,TPR
GO:BP	ncRNA export from nucleus	GO:0097064	7.04715e-68	67.152	39	29	26	17816	AAAS,NUP107,NUP133,NUP153,NUP155,NUP160,NUP188,NUP205,NUP210,NUP214,NUP35,NUP37,NUP43,NUP50,NUP54,NUP58,NUP62,NUP85,NUP88,NUP93,NUP98,POM121,RAE1,RANBP2,SEH1L,TPR
GO:BP	intracellular transport of virus	GO:0075733	1.05721e-61	60.9758	57	29	26	17816	AAAS,NUP107,NUP133,NUP153,NUP155,NUP160,NUP188,NUP205,NUP210,NUP214,NUP35,NUP37,NUP43,NUP50,NUP54,NUP58,NUP62,NUP85,NUP88,NUP93,NUP98,POM121,RAE1,RANBP2,SEH1L,TPR
GO:BP	transport of virus	GO:0046794	6.04277e-61	60.2188	60	29	26	17816	AAAS,NUP107,NUP133,NUP153,NUP155,NUP160,NUP188,NUP205,NUP210,NUP214,NUP35,NUP37,NUP43,NUP50,NUP54,NUP58,NUP62,NUP85,NUP88,NUP93,NUP98,POM121,RAE1,RANBP2,SEH1L,TPR
GO:BP	multi-organism localization	GO:1902579	2.38124e-58	57.6232	72	29	26	17816	AAAS,NUP107,NUP133,NUP153,NUP155,NUP160,NUP188,NUP205,NUP210,NUP214,NUP35,NUP37,NUP43,NUP50,NUP54,NUP58,NUP62,NUP85,NUP88,NUP93,NUP98,POM121,RAE1,RANBP2,SEH1L,TPR
GO:BP	multi-organism transport	GO:0044766	2.38124e-58	57.6232	72	29	26	17816	AAAS,NUP107,NUP133,NUP153,NUP155,NUP160,NUP188,NUP205,NUP210,NUP214,NUP35,NUP37,NUP43,NUP50,NUP54,NUP58,NUP62,NUP85,NUP88,NUP93,NUP98,POM121,RAE1,RANBP2,SEH1L,TPR
GO:BP	regulation of glycolytic process	GO:0006110	1.3257e-57	56.8776	76	29	26	17816	AAAS,NUP107,NUP133,NUP153,NUP155,NUP160,NUP188,NUP205,NUP210,NUP214,NUP35,NUP37,NUP43,NUP50,NUP54,NUP58,NUP62,NUP85,NUP88,NUP93,NUP98,POM121,RAE1,RANBP2,SEH1L,TPR
GO:BP	protein sumoylation	GO:0016925	4.47297e-57	56.3494	79	29	26	17816	AAAS,NUP107,NUP133,NUP153,NUP155,NUP160,NUP188,NUP205,NUP210,NUP214,NUP35,NUP37,NUP43,NUP50,NUP54,NUP58,NUP62,NUP85,NUP88,NUP93,NUP98,POM121,RAE1,RANBP2,SEH1L,TPR
GO:BP	regulation of cellular response to heat	GO:1900034	4.47297e-57	56.3494	79	29	26	17816	AAAS,NUP107,NUP133,NUP153,NUP155,NUP160,NUP188,NUP205,NUP210,NUP214,NUP35,NUP37,NUP43,NUP50,NUP54,NUP58,NUP62,NUP85,NUP88,NUP93,NUP98,POM121,RAE1,RANBP2,SEH1L,TPR
GO:BP	regulation of carbohydrate catabolic process	GO:0043470	3.01121e-56	55.5213	84	29	26	17816	AAAS,NUP107,NUP133,NUP153,NUP155,NUP160,NUP188,NUP205,NUP210,NUP214,NUP35,NUP37,NUP43,NUP50,NUP54,NUP58,NUP62,NUP85,NUP88,NUP93,NUP98,POM121,RAE1,RANBP2,SEH1L,TPR
GO:BP	regulation of purine nucleotide metabolic process	GO:1900542	1.01911e-52	51.9918	110	29	26	17816	AAAS,NUP107,NUP133,NUP153,NUP155,NUP160,NUP188,NUP205,NUP210,NUP214,NUP35,NUP37,NUP43,NUP50,NUP54,NUP58,NUP62,NUP85,NUP88,NUP93,NUP98,POM121,RAE1,RANBP2,SEH1L,TPR
GO:BP	regulation of ATP metabolic process	GO:1903578	1.33062e-52	51.8759	111	29	26	17816	AAAS,NUP107,NUP133,NUP153,NUP155,NUP160,NUP188,NUP205,NUP210,NUP214,NUP35,NUP37,NUP43,NUP50,NUP54,NUP58,NUP62,NUP85,NUP88,NUP93,NUP98,POM121,RAE1,RANBP2,SEH1L,TPR
GO:BP	mRNA export from nucleus	GO:0006406	1.33062e-52	51.8759	111	29	26	17816	AAAS,NUP107,NUP133,NUP153,NUP155,NUP160,NUP188,NUP205,NUP210,NUP214,NUP35,NUP37,NUP43,NUP50,NUP54,NUP58,NUP62,NUP85,NUP88,NUP93,NUP98,POM121,RAE1,RANBP2,SEH1L,TPR
GO:BP	regulation of gene silencing by miRNA	GO:0060964	1.33062e-52	51.8759	111	29	26	17816	AAAS,NUP107,NUP133,NUP153,NUP155,NUP160,NUP188,NUP205,NUP210,NUP214,NUP35,NUP37,NUP43,NUP50,NUP54,NUP58,NUP62,NUP85,NUP88,NUP93,NUP98,POM121,RAE1,RANBP2,SEH1L,TPR
GO:BP	glycolytic process	GO:0006096	1.33062e-52	51.8759	111	29	26	17816	AAAS,NUP107,NUP133,NUP153,NUP155,NUP160,NUP188,NUP205,NUP210,NUP214,NUP35,NUP37,NUP43,NUP50,NUP54,NUP58,NUP62,NUP85,NUP88,NUP93,NUP98,POM121,RAE1,RANBP2,SEH1L,TPR
GO:BP	mRNA-containing ribonucleoprotein complex export from nucleus	GO:0071427	1.33062e-52	51.8759	111	29	26	17816	AAAS,NUP107,NUP133,NUP153,NUP155,NUP160,NUP188,NUP205,NUP210,NUP214,NUP35,NUP37,NUP43,NUP50,NUP54,NUP58,NUP62,NUP85,NUP88,NUP93,NUP98,POM121,RAE1,RANBP2,SEH1L,TPR
GO:BP	regulation of nucleotide metabolic process	GO:0006140	1.73262e-52	51.7613	112	29	26	17816	AAAS,NUP107,NUP133,NUP153,NUP155,NUP160,NUP188,NUP205,NUP210,NUP214,NUP35,NUP37,NUP43,NUP50,NUP54,NUP58,NUP62,NUP85,NUP88,NUP93,NUP98,POM121,RAE1,RANBP2,SEH1L,TPR
GO:BP	ATP generation from ADP	GO:0006757	1.73262e-52	51.7613	112	29	26	17816	AAAS,NUP107,NUP133,NUP153,NUP155,NUP160,NUP188,NUP205,NUP210,NUP214,NUP35,NUP37,NUP43,NUP50,NUP54,NUP58,NUP62,NUP85,NUP88,NUP93,NUP98,POM121,RAE1,RANBP2,SEH1L,TPR
GO:BP	regulation of posttranscriptional gene silencing	GO:0060147	2.91436e-52	51.5355	114	29	26	17816	AAAS,NUP107,NUP133,NUP153,NUP155,NUP160,NUP188,NUP205,NUP210,NUP214,NUP35,NUP37,NUP43,NUP50,NUP54,NUP58,NUP62,NUP85,NUP88,NUP93,NUP98,POM121,RAE1,RANBP2,SEH1L,TPR
GO:BP	regulation of gene silencing by RNA	GO:0060966	2.91436e-52	51.5355	114	29	26	17816	AAAS,NUP107,NUP133,NUP153,NUP155,NUP160,NUP188,NUP205,NUP210,NUP214,NUP35,NUP37,NUP43,NUP50,NUP54,NUP58,NUP62,NUP85,NUP88,NUP93,NUP98,POM121,RAE1,RANBP2,SEH1L,TPR
GO:BP	ADP metabolic process	GO:0046031	1.30616e-51	50.884	120	29	26	17816	AAAS,NUP107,NUP133,NUP153,NUP155,NUP160,NUP188,NUP205,NUP210,NUP214,NUP35,NUP37,NUP43,NUP50,NUP54,NUP58,NUP62,NUP85,NUP88,NUP93,NUP98,POM121,RAE1,RANBP2,SEH1L,TPR
GO:BP	nucleoside diphosphate phosphorylation	GO:0006165	1.33097e-50	49.8758	130	29	26	17816	AAAS,NUP107,NUP133,NUP153,NUP155,NUP160,NUP188,NUP205,NUP210,NUP214,NUP35,NUP37,NUP43,NUP50,NUP54,NUP58,NUP62,NUP85,NUP88,NUP93,NUP98,POM121,RAE1,RANBP2,SEH1L,TPR
GO:BP	ribonucleoprotein complex export from nucleus	GO:0071426	1.66027e-50	49.7798	131	29	26	17816	AAAS,NUP107,NUP133,NUP153,NUP155,NUP160,NUP188,NUP205,NUP210,NUP214,NUP35,NUP37,NUP43,NUP50,NUP54,NUP58,NUP62,NUP85,NUP88,NUP93,NUP98,POM121,RAE1,RANBP2,SEH1L,TPR
GO:BP	ribonucleoprotein complex localization	GO:0071166	2.06717e-50	49.6846	132	29	26	17816	AAAS,NUP107,NUP133,NUP153,NUP155,NUP160,NUP188,NUP205,NUP210,NUP214,NUP35,NUP37,NUP43,NUP50,NUP54,NUP58,NUP62,NUP85,NUP88,NUP93,NUP98,POM121,RAE1,RANBP2,SEH1L,TPR
GO:BP	purine nucleoside diphosphate metabolic process	GO:0009135	2.06717e-50	49.6846	132	29	26	17816	AAAS,NUP107,NUP133,NUP153,NUP155,NUP160,NUP188,NUP205,NUP210,NUP214,NUP35,NUP37,NUP43,NUP50,NUP54,NUP58,NUP62,NUP85,NUP88,NUP93,NUP98,POM121,RAE1,RANBP2,SEH1L,TPR
GO:BP	nucleotide phosphorylation	GO:0046939	2.06717e-50	49.6846	132	29	26	17816	AAAS,NUP107,NUP133,NUP153,NUP155,NUP160,NUP188,NUP205,NUP210,NUP214,NUP35,NUP37,NUP43,NUP50,NUP54,NUP58,NUP62,NUP85,NUP88,NUP93,NUP98,POM121,RAE1,RANBP2,SEH1L,TPR
GO:BP	purine ribonucleoside diphosphate metabolic process	GO:0009179	2.06717e-50	49.6846	132	29	26	17816	AAAS,NUP107,NUP133,NUP153,NUP155,NUP160,NUP188,NUP205,NUP210,NUP214,NUP35,NUP37,NUP43,NUP50,NUP54,NUP58,NUP62,NUP85,NUP88,NUP93,NUP98,POM121,RAE1,RANBP2,SEH1L,TPR
GO:BP	cellular response to heat	GO:0034605	2.56905e-50	49.5902	133	29	26	17816	AAAS,NUP107,NUP133,NUP153,NUP155,NUP160,NUP188,NUP205,NUP210,NUP214,NUP35,NUP37,NUP43,NUP50,NUP54,NUP58,NUP62,NUP85,NUP88,NUP93,NUP98,POM121,RAE1,RANBP2,SEH1L,TPR
GO:BP	ribonucleoside diphosphate metabolic process	GO:0009185	3.18701e-50	49.4966	134	29	26	17816	AAAS,NUP107,NUP133,NUP153,NUP155,NUP160,NUP188,NUP205,NUP210,NUP214,NUP35,NUP37,NUP43,NUP50,NUP54,NUP58,NUP62,NUP85,NUP88,NUP93,NUP98,POM121,RAE1,RANBP2,SEH1L,TPR
GO:BP	RNA export from nucleus	GO:0006405	1.12003e-49	48.9508	140	29	26	17816	AAAS,NUP107,NUP133,NUP153,NUP155,NUP160,NUP188,NUP205,NUP210,NUP214,NUP35,NUP37,NUP43,NUP50,NUP54,NUP58,NUP62,NUP85,NUP88,NUP93,NUP98,POM121,RAE1,RANBP2,SEH1L,TPR
GO:BP	regulation of generation of precursor metabolites and energy	GO:0043467	3.71345e-49	48.4302	146	29	26	17816	AAAS,NUP107,NUP133,NUP153,NUP155,NUP160,NUP188,NUP205,NUP210,NUP214,NUP35,NUP37,NUP43,NUP50,NUP54,NUP58,NUP62,NUP85,NUP88,NUP93,NUP98,POM121,RAE1,RANBP2,SEH1L,TPR
GO:BP	mRNA transport	GO:0051028	5.47104e-49	48.2619	148	29	26	17816	AAAS,NUP107,NUP133,NUP153,NUP155,NUP160,NUP188,NUP205,NUP210,NUP214,NUP35,NUP37,NUP43,NUP50,NUP54,NUP58,NUP62,NUP85,NUP88,NUP93,NUP98,POM121,RAE1,RANBP2,SEH1L,TPR
GO:BP	pyruvate metabolic process	GO:0006090	6.62644e-49	48.1787	149	29	26	17816	AAAS,NUP107,NUP133,NUP153,NUP155,NUP160,NUP188,NUP205,NUP210,NUP214,NUP35,NUP37,NUP43,NUP50,NUP54,NUP58,NUP62,NUP85,NUP88,NUP93,NUP98,POM121,RAE1,RANBP2,SEH1L,TPR
GO:BP	regulation of gene silencing	GO:0060968	9.67999e-49	48.0141	151	29	26	17816	AAAS,NUP107,NUP133,NUP153,NUP155,NUP160,NUP188,NUP205,NUP210,NUP214,NUP35,NUP37,NUP43,NUP50,NUP54,NUP58,NUP62,NUP85,NUP88,NUP93,NUP98,POM121,RAE1,RANBP2,SEH1L,TPR
GO:BP	nucleoside diphosphate metabolic process	GO:0009132	1.16755e-48	47.9327	152	29	26	17816	AAAS,NUP107,NUP133,NUP153,NUP155,NUP160,NUP188,NUP205,NUP210,NUP214,NUP35,NUP37,NUP43,NUP50,NUP54,NUP58,NUP62,NUP85,NUP88,NUP93,NUP98,POM121,RAE1,RANBP2,SEH1L,TPR
GO:BP	response to heat	GO:0009408	5.28971e-47	46.2766	174	29	26	17816	AAAS,NUP107,NUP133,NUP153,NUP155,NUP160,NUP188,NUP205,NUP210,NUP214,NUP35,NUP37,NUP43,NUP50,NUP54,NUP58,NUP62,NUP85,NUP88,NUP93,NUP98,POM121,RAE1,RANBP2,SEH1L,TPR
GO:BP	viral transcription	GO:0019083	8.5406e-47	46.0685	177	29	26	17816	AAAS,NUP107,NUP133,NUP153,NUP155,NUP160,NUP188,NUP205,NUP210,NUP214,NUP35,NUP37,NUP43,NUP50,NUP54,NUP58,NUP62,NUP85,NUP88,NUP93,NUP98,POM121,RAE1,RANBP2,SEH1L,TPR
GO:BP	protein export from nucleus	GO:0006611	2.16968e-46	45.6636	183	29	26	17816	AAAS,NUP107,NUP133,NUP153,NUP155,NUP160,NUP188,NUP205,NUP210,NUP214,NUP35,NUP37,NUP43,NUP50,NUP54,NUP58,NUP62,NUP85,NUP88,NUP93,NUP98,POM121,RAE1,RANBP2,SEH1L,TPR
GO:BP	viral gene expression	GO:0019080	7.15398e-46	45.1455	191	29	26	17816	AAAS,NUP107,NUP133,NUP153,NUP155,NUP160,NUP188,NUP205,NUP210,NUP214,NUP35,NUP37,NUP43,NUP50,NUP54,NUP58,NUP62,NUP85,NUP88,NUP93,NUP98,POM121,RAE1,RANBP2,SEH1L,TPR
GO:BP	RNA transport	GO:0050658	1.10372e-45	44.9571	194	29	26	17816	AAAS,NUP107,NUP133,NUP153,NUP155,NUP160,NUP188,NUP205,NUP210,NUP214,NUP35,NUP37,NUP43,NUP50,NUP54,NUP58,NUP62,NUP85,NUP88,NUP93,NUP98,POM121,RAE1,RANBP2,SEH1L,TPR
GO:BP	nucleic acid transport	GO:0050657	1.10372e-45	44.9571	194	29	26	17816	AAAS,NUP107,NUP133,NUP153,NUP155,NUP160,NUP188,NUP205,NUP210,NUP214,NUP35,NUP37,NUP43,NUP50,NUP54,NUP58,NUP62,NUP85,NUP88,NUP93,NUP98,POM121,RAE1,RANBP2,SEH1L,TPR
GO:BP	carbohydrate catabolic process	GO:0016052	1.27332e-45	44.8951	195	29	26	17816	AAAS,NUP107,NUP133,NUP153,NUP155,NUP160,NUP188,NUP205,NUP210,NUP214,NUP35,NUP37,NUP43,NUP50,NUP54,NUP58,NUP62,NUP85,NUP88,NUP93,NUP98,POM121,RAE1,RANBP2,SEH1L,TPR
GO:BP	establishment of RNA localization	GO:0051236	1.69072e-45	44.7719	197	29	26	17816	AAAS,NUP107,NUP133,NUP153,NUP155,NUP160,NUP188,NUP205,NUP210,NUP214,NUP35,NUP37,NUP43,NUP50,NUP54,NUP58,NUP62,NUP85,NUP88,NUP93,NUP98,POM121,RAE1,RANBP2,SEH1L,TPR
GO:BP	nuclear export	GO:0051168	1.94598e-45	44.7109	198	29	26	17816	AAAS,NUP107,NUP133,NUP153,NUP155,NUP160,NUP188,NUP205,NUP210,NUP214,NUP35,NUP37,NUP43,NUP50,NUP54,NUP58,NUP62,NUP85,NUP88,NUP93,NUP98,POM121,RAE1,RANBP2,SEH1L,TPR
GO:BP	regulation of carbohydrate metabolic process	GO:0006109	2.95372e-45	44.5296	201	29	26	17816	AAAS,NUP107,NUP133,NUP153,NUP155,NUP160,NUP188,NUP205,NUP210,NUP214,NUP35,NUP37,NUP43,NUP50,NUP54,NUP58,NUP62,NUP85,NUP88,NUP93,NUP98,POM121,RAE1,RANBP2,SEH1L,TPR
GO:BP	nucleocytoplasmic transport	GO:0006913	2.54017e-44	43.5951	348	29	28	17816	AAAS,KPNA4,KPNA5,NUP107,NUP133,NUP153,NUP155,NUP160,NUP188,NUP205,NUP210,NUP214,NUP35,NUP37,NUP43,NUP50,NUP54,NUP58,NUP62,NUP85,NUP88,NUP93,NUP98,POM121,RAE1,RANBP2,SEH1L,TPR
GO:BP	nuclear transport	GO:0051169	3.26158e-44	43.4866	351	29	28	17816	AAAS,KPNA4,KPNA5,NUP107,NUP133,NUP153,NUP155,NUP160,NUP188,NUP205,NUP210,NUP214,NUP35,NUP37,NUP43,NUP50,NUP54,NUP58,NUP62,NUP85,NUP88,NUP93,NUP98,POM121,RAE1,RANBP2,SEH1L,TPR
GO:BP	RNA localization	GO:0006403	1.5478e-43	42.8103	232	29	26	17816	AAAS,NUP107,NUP133,NUP153,NUP155,NUP160,NUP188,NUP205,NUP210,NUP214,NUP35,NUP37,NUP43,NUP50,NUP54,NUP58,NUP62,NUP85,NUP88,NUP93,NUP98,POM121,RAE1,RANBP2,SEH1L,TPR
GO:BP	response to temperature stimulus	GO:0009266	3.92482e-43	42.4062	240	29	26	17816	AAAS,NUP107,NUP133,NUP153,NUP155,NUP160,NUP188,NUP205,NUP210,NUP214,NUP35,NUP37,NUP43,NUP50,NUP54,NUP58,NUP62,NUP85,NUP88,NUP93,NUP98,POM121,RAE1,RANBP2,SEH1L,TPR
GO:BP	nucleobase-containing compound transport	GO:0015931	6.17382e-43	42.2094	244	29	26	17816	AAAS,NUP107,NUP133,NUP153,NUP155,NUP160,NUP188,NUP205,NUP210,NUP214,NUP35,NUP37,NUP43,NUP50,NUP54,NUP58,NUP62,NUP85,NUP88,NUP93,NUP98,POM121,RAE1,RANBP2,SEH1L,TPR
GO:BP	viral life cycle	GO:0019058	4.36396e-42	41.3601	330	29	27	17816	AAAS,ISG15,NUP107,NUP133,NUP153,NUP155,NUP160,NUP188,NUP205,NUP210,NUP214,NUP35,NUP37,NUP43,NUP50,NUP54,NUP58,NUP62,NUP85,NUP88,NUP93,NUP98,POM121,RAE1,RANBP2,SEH1L,TPR
GO:BP	protein-containing complex localization	GO:0031503	6.23535e-41	40.2051	289	29	26	17816	AAAS,NUP107,NUP133,NUP153,NUP155,NUP160,NUP188,NUP205,NUP210,NUP214,NUP35,NUP37,NUP43,NUP50,NUP54,NUP58,NUP62,NUP85,NUP88,NUP93,NUP98,POM121,RAE1,RANBP2,SEH1L,TPR
GO:BP	ATP metabolic process	GO:0046034	1.30793e-40	39.8834	297	29	26	17816	AAAS,NUP107,NUP133,NUP153,NUP155,NUP160,NUP188,NUP205,NUP210,NUP214,NUP35,NUP37,NUP43,NUP50,NUP54,NUP58,NUP62,NUP85,NUP88,NUP93,NUP98,POM121,RAE1,RANBP2,SEH1L,TPR
GO:BP	gene silencing by miRNA	GO:0035195	5.28823e-38	37.2767	371	29	26	17816	AAAS,NUP107,NUP133,NUP153,NUP155,NUP160,NUP188,NUP205,NUP210,NUP214,NUP35,NUP37,NUP43,NUP50,NUP54,NUP58,NUP62,NUP85,NUP88,NUP93,NUP98,POM121,RAE1,RANBP2,SEH1L,TPR
GO:BP	posttranscriptional gene silencing by RNA	GO:0035194	1.00637e-37	36.9972	380	29	26	17816	AAAS,NUP107,NUP133,NUP153,NUP155,NUP160,NUP188,NUP205,NUP210,NUP214,NUP35,NUP37,NUP43,NUP50,NUP54,NUP58,NUP62,NUP85,NUP88,NUP93,NUP98,POM121,RAE1,RANBP2,SEH1L,TPR
GO:BP	posttranscriptional gene silencing	GO:0016441	1.07989e-37	36.9666	381	29	26	17816	AAAS,NUP107,NUP133,NUP153,NUP155,NUP160,NUP188,NUP205,NUP210,NUP214,NUP35,NUP37,NUP43,NUP50,NUP54,NUP58,NUP62,NUP85,NUP88,NUP93,NUP98,POM121,RAE1,RANBP2,SEH1L,TPR
GO:BP	purine ribonucleotide metabolic process	GO:0009150	2.48033e-37	36.6055	393	29	26	17816	AAAS,NUP107,NUP133,NUP153,NUP155,NUP160,NUP188,NUP205,NUP210,NUP214,NUP35,NUP37,NUP43,NUP50,NUP54,NUP58,NUP62,NUP85,NUP88,NUP93,NUP98,POM121,RAE1,RANBP2,SEH1L,TPR
GO:BP	peptidyl-lysine modification	GO:0018205	3.7223e-37	36.4292	399	29	26	17816	AAAS,NUP107,NUP133,NUP153,NUP155,NUP160,NUP188,NUP205,NUP210,NUP214,NUP35,NUP37,NUP43,NUP50,NUP54,NUP58,NUP62,NUP85,NUP88,NUP93,NUP98,POM121,RAE1,RANBP2,SEH1L,TPR
GO:BP	gene silencing by RNA	GO:0031047	5.55121e-37	36.2556	405	29	26	17816	AAAS,NUP107,NUP133,NUP153,NUP155,NUP160,NUP188,NUP205,NUP210,NUP214,NUP35,NUP37,NUP43,NUP50,NUP54,NUP58,NUP62,NUP85,NUP88,NUP93,NUP98,POM121,RAE1,RANBP2,SEH1L,TPR
GO:BP	ribonucleotide metabolic process	GO:0009259	6.76364e-37	36.1698	408	29	26	17816	AAAS,NUP107,NUP133,NUP153,NUP155,NUP160,NUP188,NUP205,NUP210,NUP214,NUP35,NUP37,NUP43,NUP50,NUP54,NUP58,NUP62,NUP85,NUP88,NUP93,NUP98,POM121,RAE1,RANBP2,SEH1L,TPR
GO:BP	ribose phosphate metabolic process	GO:0019693	1.29274e-36	35.8885	418	29	26	17816	AAAS,NUP107,NUP133,NUP153,NUP155,NUP160,NUP188,NUP205,NUP210,NUP214,NUP35,NUP37,NUP43,NUP50,NUP54,NUP58,NUP62,NUP85,NUP88,NUP93,NUP98,POM121,RAE1,RANBP2,SEH1L,TPR
GO:BP	regulation of small molecule metabolic process	GO:0062012	1.77656e-36	35.7504	423	29	26	17816	AAAS,NUP107,NUP133,NUP153,NUP155,NUP160,NUP188,NUP205,NUP210,NUP214,NUP35,NUP37,NUP43,NUP50,NUP54,NUP58,NUP62,NUP85,NUP88,NUP93,NUP98,POM121,RAE1,RANBP2,SEH1L,TPR
GO:BP	purine nucleotide metabolic process	GO:0006163	2.14591e-36	35.6684	426	29	26	17816	AAAS,NUP107,NUP133,NUP153,NUP155,NUP160,NUP188,NUP205,NUP210,NUP214,NUP35,NUP37,NUP43,NUP50,NUP54,NUP58,NUP62,NUP85,NUP88,NUP93,NUP98,POM121,RAE1,RANBP2,SEH1L,TPR
GO:BP	viral process	GO:0016032	2.23994e-36	35.6498	823	29	29	17816	AAAS,ISG15,KPNA4,KPNA5,NUP107,NUP133,NUP153,NUP155,NUP160,NUP188,NUP205,NUP210,NUP214,NUP35,NUP37,NUP43,NUP50,NUP54,NUP58,NUP62,NUP85,NUP88,NUP93,NUP98,POM121,RAE1,RANBP2,SEH1L,TPR
GO:BP	purine-containing compound metabolic process	GO:0072521	1.57213e-35	34.8035	459	29	26	17816	AAAS,NUP107,NUP133,NUP153,NUP155,NUP160,NUP188,NUP205,NUP210,NUP214,NUP35,NUP37,NUP43,NUP50,NUP54,NUP58,NUP62,NUP85,NUP88,NUP93,NUP98,POM121,RAE1,RANBP2,SEH1L,TPR
GO:BP	symbiont process	GO:0044403	1.97152e-35	34.7052	886	29	29	17816	AAAS,ISG15,KPNA4,KPNA5,NUP107,NUP133,NUP153,NUP155,NUP160,NUP188,NUP205,NUP210,NUP214,NUP35,NUP37,NUP43,NUP50,NUP54,NUP58,NUP62,NUP85,NUP88,NUP93,NUP98,POM121,RAE1,RANBP2,SEH1L,TPR
GO:BP	interspecies interaction between organisms	GO:0044419	9.03714e-35	34.044	933	29	29	17816	AAAS,ISG15,KPNA4,KPNA5,NUP107,NUP133,NUP153,NUP155,NUP160,NUP188,NUP205,NUP210,NUP214,NUP35,NUP37,NUP43,NUP50,NUP54,NUP58,NUP62,NUP85,NUP88,NUP93,NUP98,POM121,RAE1,RANBP2,SEH1L,TPR
GO:BP	gene silencing	GO:0016458	1.30696e-34	33.8837	497	29	26	17816	AAAS,NUP107,NUP133,NUP153,NUP155,NUP160,NUP188,NUP205,NUP210,NUP214,NUP35,NUP37,NUP43,NUP50,NUP54,NUP58,NUP62,NUP85,NUP88,NUP93,NUP98,POM121,RAE1,RANBP2,SEH1L,TPR
GO:BP	generation of precursor metabolites and energy	GO:0006091	9.7236e-34	33.0122	536	29	26	17816	AAAS,NUP107,NUP133,NUP153,NUP155,NUP160,NUP188,NUP205,NUP210,NUP214,NUP35,NUP37,NUP43,NUP50,NUP54,NUP58,NUP62,NUP85,NUP88,NUP93,NUP98,POM121,RAE1,RANBP2,SEH1L,TPR
GO:BP	nucleotide metabolic process	GO:0009117	1.07337e-33	32.9693	538	29	26	17816	AAAS,NUP107,NUP133,NUP153,NUP155,NUP160,NUP188,NUP205,NUP210,NUP214,NUP35,NUP37,NUP43,NUP50,NUP54,NUP58,NUP62,NUP85,NUP88,NUP93,NUP98,POM121,RAE1,RANBP2,SEH1L,TPR
GO:BP	nucleoside phosphate metabolic process	GO:0006753	1.58784e-33	32.7992	546	29	26	17816	AAAS,NUP107,NUP133,NUP153,NUP155,NUP160,NUP188,NUP205,NUP210,NUP214,NUP35,NUP37,NUP43,NUP50,NUP54,NUP58,NUP62,NUP85,NUP88,NUP93,NUP98,POM121,RAE1,RANBP2,SEH1L,TPR
GO:BP	regulation of gene expression, epigenetic	GO:0040029	2.22597e-33	32.6525	553	29	26	17816	AAAS,NUP107,NUP133,NUP153,NUP155,NUP160,NUP188,NUP205,NUP210,NUP214,NUP35,NUP37,NUP43,NUP50,NUP54,NUP58,NUP62,NUP85,NUP88,NUP93,NUP98,POM121,RAE1,RANBP2,SEH1L,TPR
GO:BP	protein import into nucleus	GO:0006606	6.50877e-33	32.1865	144	29	20	17816	KPNA4,KPNA5,NUP107,NUP133,NUP153,NUP155,NUP188,NUP214,NUP35,NUP50,NUP54,NUP58,NUP62,NUP85,NUP88,NUP93,NUP98,POM121,RANBP2,TPR
GO:BP	carbohydrate metabolic process	GO:0005975	5.92848e-32	31.2271	626	29	26	17816	AAAS,NUP107,NUP133,NUP153,NUP155,NUP160,NUP188,NUP205,NUP210,NUP214,NUP35,NUP37,NUP43,NUP50,NUP54,NUP58,NUP62,NUP85,NUP88,NUP93,NUP98,POM121,RAE1,RANBP2,SEH1L,TPR
GO:BP	nucleobase-containing small molecule metabolic process	GO:0055086	6.44992e-32	31.1904	628	29	26	17816	AAAS,NUP107,NUP133,NUP153,NUP155,NUP160,NUP188,NUP205,NUP210,NUP214,NUP35,NUP37,NUP43,NUP50,NUP54,NUP58,NUP62,NUP85,NUP88,NUP93,NUP98,POM121,RAE1,RANBP2,SEH1L,TPR
GO:BP	import into nucleus	GO:0051170	1.17829e-31	30.9287	165	29	20	17816	KPNA4,KPNA5,NUP107,NUP133,NUP153,NUP155,NUP188,NUP214,NUP35,NUP50,NUP54,NUP58,NUP62,NUP85,NUP88,NUP93,NUP98,POM121,RANBP2,TPR
GO:BP	monocarboxylic acid metabolic process	GO:0032787	1.53782e-31	30.8131	649	29	26	17816	AAAS,NUP107,NUP133,NUP153,NUP155,NUP160,NUP188,NUP205,NUP210,NUP214,NUP35,NUP37,NUP43,NUP50,NUP54,NUP58,NUP62,NUP85,NUP88,NUP93,NUP98,POM121,RAE1,RANBP2,SEH1L,TPR
GO:BP	protein import	GO:0017038	3.56604e-30	29.4478	194	29	20	17816	KPNA4,KPNA5,NUP107,NUP133,NUP153,NUP155,NUP188,NUP214,NUP35,NUP50,NUP54,NUP58,NUP62,NUP85,NUP88,NUP93,NUP98,POM121,RANBP2,TPR
GO:BP	regulation of cellular response to stress	GO:0080135	6.04847e-30	29.2184	746	29	26	17816	AAAS,NUP107,NUP133,NUP153,NUP155,NUP160,NUP188,NUP205,NUP210,NUP214,NUP35,NUP37,NUP43,NUP50,NUP54,NUP58,NUP62,NUP85,NUP88,NUP93,NUP98,POM121,RAE1,RANBP2,SEH1L,TPR
GO:BP	protein modification by small protein conjugation	GO:0032446	6.67691e-30	29.1754	911	29	27	17816	AAAS,ISG15,NUP107,NUP133,NUP153,NUP155,NUP160,NUP188,NUP205,NUP210,NUP214,NUP35,NUP37,NUP43,NUP50,NUP54,NUP58,NUP62,NUP85,NUP88,NUP93,NUP98,POM121,RAE1,RANBP2,SEH1L,TPR
GO:BP	intracellular protein transport	GO:0006886	2.3311e-29	28.6324	1160	29	28	17816	AAAS,KPNA4,KPNA5,NUP107,NUP133,NUP153,NUP155,NUP160,NUP188,NUP205,NUP210,NUP214,NUP35,NUP37,NUP43,NUP50,NUP54,NUP58,NUP62,NUP85,NUP88,NUP93,NUP98,POM121,RAE1,RANBP2,SEH1L,TPR
GO:BP	posttranscriptional regulation of gene expression	GO:0010608	8.26258e-29	28.0829	824	29	26	17816	AAAS,NUP107,NUP133,NUP153,NUP155,NUP160,NUP188,NUP205,NUP210,NUP214,NUP35,NUP37,NUP43,NUP50,NUP54,NUP58,NUP62,NUP85,NUP88,NUP93,NUP98,POM121,RAE1,RANBP2,SEH1L,TPR
GO:BP	protein localization to nucleus	GO:0034504	1.70141e-27	26.7692	261	29	20	17816	KPNA4,KPNA5,NUP107,NUP133,NUP153,NUP155,NUP188,NUP214,NUP35,NUP50,NUP54,NUP58,NUP62,NUP85,NUP88,NUP93,NUP98,POM121,RANBP2,TPR
GO:BP	protein modification by small protein conjugation or removal	GO:0070647	1.85291e-27	26.7321	1120	29	27	17816	AAAS,ISG15,NUP107,NUP133,NUP153,NUP155,NUP160,NUP188,NUP205,NUP210,NUP214,NUP35,NUP37,NUP43,NUP50,NUP54,NUP58,NUP62,NUP85,NUP88,NUP93,NUP98,POM121,RAE1,RANBP2,SEH1L,TPR
GO:BP	regulation of catabolic process	GO:0009894	7.57758e-27	26.1205	979	29	26	17816	AAAS,NUP107,NUP133,NUP153,NUP155,NUP160,NUP188,NUP205,NUP210,NUP214,NUP35,NUP37,NUP43,NUP50,NUP54,NUP58,NUP62,NUP85,NUP88,NUP93,NUP98,POM121,RAE1,RANBP2,SEH1L,TPR
GO:BP	organophosphate metabolic process	GO:0019637	3.16534e-26	25.4996	1034	29	26	17816	AAAS,NUP107,NUP133,NUP153,NUP155,NUP160,NUP188,NUP205,NUP210,NUP214,NUP35,NUP37,NUP43,NUP50,NUP54,NUP58,NUP62,NUP85,NUP88,NUP93,NUP98,POM121,RAE1,RANBP2,SEH1L,TPR
GO:BP	carboxylic acid metabolic process	GO:0019752	9.87137e-26	25.0056	1080	29	26	17816	AAAS,NUP107,NUP133,NUP153,NUP155,NUP160,NUP188,NUP205,NUP210,NUP214,NUP35,NUP37,NUP43,NUP50,NUP54,NUP58,NUP62,NUP85,NUP88,NUP93,NUP98,POM121,RAE1,RANBP2,SEH1L,TPR
GO:BP	carbohydrate derivative metabolic process	GO:1901135	2.01883e-25	24.6949	1110	29	26	17816	AAAS,NUP107,NUP133,NUP153,NUP155,NUP160,NUP188,NUP205,NUP210,NUP214,NUP35,NUP37,NUP43,NUP50,NUP54,NUP58,NUP62,NUP85,NUP88,NUP93,NUP98,POM121,RAE1,RANBP2,SEH1L,TPR
GO:BP	oxoacid metabolic process	GO:0043436	7.79772e-25	24.108	1169	29	26	17816	AAAS,NUP107,NUP133,NUP153,NUP155,NUP160,NUP188,NUP205,NUP210,NUP214,NUP35,NUP37,NUP43,NUP50,NUP54,NUP58,NUP62,NUP85,NUP88,NUP93,NUP98,POM121,RAE1,RANBP2,SEH1L,TPR
GO:BP	organic acid metabolic process	GO:0006082	1.2136e-24	23.9159	1189	29	26	17816	AAAS,NUP107,NUP133,NUP153,NUP155,NUP160,NUP188,NUP205,NUP210,NUP214,NUP35,NUP37,NUP43,NUP50,NUP54,NUP58,NUP62,NUP85,NUP88,NUP93,NUP98,POM121,RAE1,RANBP2,SEH1L,TPR
GO:BP	intracellular transport	GO:0046907	1.91373e-24	23.7181	1733	29	28	17816	AAAS,KPNA4,KPNA5,NUP107,NUP133,NUP153,NUP155,NUP160,NUP188,NUP205,NUP210,NUP214,NUP35,NUP37,NUP43,NUP50,NUP54,NUP58,NUP62,NUP85,NUP88,NUP93,NUP98,POM121,RAE1,RANBP2,SEH1L,TPR
GO:BP	response to abiotic stimulus	GO:0009628	4.02665e-24	23.3951	1245	29	26	17816	AAAS,NUP107,NUP133,NUP153,NUP155,NUP160,NUP188,NUP205,NUP210,NUP214,NUP35,NUP37,NUP43,NUP50,NUP54,NUP58,NUP62,NUP85,NUP88,NUP93,NUP98,POM121,RAE1,RANBP2,SEH1L,TPR
GO:BP	peptidyl-amino acid modification	GO:0018193	4.65981e-24	23.3316	1252	29	26	17816	AAAS,NUP107,NUP133,NUP153,NUP155,NUP160,NUP188,NUP205,NUP210,NUP214,NUP35,NUP37,NUP43,NUP50,NUP54,NUP58,NUP62,NUP85,NUP88,NUP93,NUP98,POM121,RAE1,RANBP2,SEH1L,TPR
GO:BP	cellular protein localization	GO:0034613	3.12044e-23	22.5058	1914	29	28	17816	AAAS,KPNA4,KPNA5,NUP107,NUP133,NUP153,NUP155,NUP160,NUP188,NUP205,NUP210,NUP214,NUP35,NUP37,NUP43,NUP50,NUP54,NUP58,NUP62,NUP85,NUP88,NUP93,NUP98,POM121,RAE1,RANBP2,SEH1L,TPR
GO:BP	cellular macromolecule localization	GO:0070727	3.66529e-23	22.4359	1925	29	28	17816	AAAS,KPNA4,KPNA5,NUP107,NUP133,NUP153,NUP155,NUP160,NUP188,NUP205,NUP210,NUP214,NUP35,NUP37,NUP43,NUP50,NUP54,NUP58,NUP62,NUP85,NUP88,NUP93,NUP98,POM121,RAE1,RANBP2,SEH1L,TPR
GO:BP	nuclear pore organization	GO:0006999	4.33695e-23	22.3628	14	29	10	17816	NUP107,NUP133,NUP153,NUP205,NUP35,NUP54,NUP93,NUP98,SEH1L,TPR
GO:BP	protein transport	GO:0015031	2.55942e-22	21.5919	2063	29	28	17816	AAAS,KPNA4,KPNA5,NUP107,NUP133,NUP153,NUP155,NUP160,NUP188,NUP205,NUP210,NUP214,NUP35,NUP37,NUP43,NUP50,NUP54,NUP58,NUP62,NUP85,NUP88,NUP93,NUP98,POM121,RAE1,RANBP2,SEH1L,TPR
GO:BP	peptide transport	GO:0015833	4.21441e-22	21.3753	2100	29	28	17816	AAAS,KPNA4,KPNA5,NUP107,NUP133,NUP153,NUP155,NUP160,NUP188,NUP205,NUP210,NUP214,NUP35,NUP37,NUP43,NUP50,NUP54,NUP58,NUP62,NUP85,NUP88,NUP93,NUP98,POM121,RAE1,RANBP2,SEH1L,TPR
GO:BP	amide transport	GO:0042886	6.44126e-22	21.191	2132	29	28	17816	AAAS,KPNA4,KPNA5,NUP107,NUP133,NUP153,NUP155,NUP160,NUP188,NUP205,NUP210,NUP214,NUP35,NUP37,NUP43,NUP50,NUP54,NUP58,NUP62,NUP85,NUP88,NUP93,NUP98,POM121,RAE1,RANBP2,SEH1L,TPR
GO:BP	regulation of response to stress	GO:0080134	8.55473e-22	21.0678	1530	29	26	17816	AAAS,NUP107,NUP133,NUP153,NUP155,NUP160,NUP188,NUP205,NUP210,NUP214,NUP35,NUP37,NUP43,NUP50,NUP54,NUP58,NUP62,NUP85,NUP88,NUP93,NUP98,POM121,RAE1,RANBP2,SEH1L,TPR
GO:BP	establishment of protein localization	GO:0045184	1.11321e-21	20.9534	2174	29	28	17816	AAAS,KPNA4,KPNA5,NUP107,NUP133,NUP153,NUP155,NUP160,NUP188,NUP205,NUP210,NUP214,NUP35,NUP37,NUP43,NUP50,NUP54,NUP58,NUP62,NUP85,NUP88,NUP93,NUP98,POM121,RAE1,RANBP2,SEH1L,TPR
GO:BP	establishment of localization in cell	GO:0051649	2.13272e-21	20.6711	2225	29	28	17816	AAAS,KPNA4,KPNA5,NUP107,NUP133,NUP153,NUP155,NUP160,NUP188,NUP205,NUP210,NUP214,NUP35,NUP37,NUP43,NUP50,NUP54,NUP58,NUP62,NUP85,NUP88,NUP93,NUP98,POM121,RAE1,RANBP2,SEH1L,TPR
GO:BP	regulation of phosphorylation	GO:0042325	3.10591e-21	20.5078	1608	29	26	17816	AAAS,NUP107,NUP133,NUP153,NUP155,NUP160,NUP188,NUP205,NUP210,NUP214,NUP35,NUP37,NUP43,NUP50,NUP54,NUP58,NUP62,NUP85,NUP88,NUP93,NUP98,POM121,RAE1,RANBP2,SEH1L,TPR
GO:BP	establishment of protein localization to organelle	GO:0072594	8.43937e-21	20.0737	557	29	20	17816	KPNA4,KPNA5,NUP107,NUP133,NUP153,NUP155,NUP188,NUP214,NUP35,NUP50,NUP54,NUP58,NUP62,NUP85,NUP88,NUP93,NUP98,POM121,RANBP2,TPR
GO:BP	cellular response to stress	GO:0033554	2.41212e-20	19.6176	2052	29	27	17816	AAAS,ISG15,NUP107,NUP133,NUP153,NUP155,NUP160,NUP188,NUP205,NUP210,NUP214,NUP35,NUP37,NUP43,NUP50,NUP54,NUP58,NUP62,NUP85,NUP88,NUP93,NUP98,POM121,RAE1,RANBP2,SEH1L,TPR
GO:BP	nitrogen compound transport	GO:0071705	2.76309e-20	19.5586	2438	29	28	17816	AAAS,KPNA4,KPNA5,NUP107,NUP133,NUP153,NUP155,NUP160,NUP188,NUP205,NUP210,NUP214,NUP35,NUP37,NUP43,NUP50,NUP54,NUP58,NUP62,NUP85,NUP88,NUP93,NUP98,POM121,RAE1,RANBP2,SEH1L,TPR
GO:BP	regulation of phosphate metabolic process	GO:0019220	5.75977e-20	19.2396	1800	29	26	17816	AAAS,NUP107,NUP133,NUP153,NUP155,NUP160,NUP188,NUP205,NUP210,NUP214,NUP35,NUP37,NUP43,NUP50,NUP54,NUP58,NUP62,NUP85,NUP88,NUP93,NUP98,POM121,RAE1,RANBP2,SEH1L,TPR
GO:BP	regulation of phosphorus metabolic process	GO:0051174	5.92756e-20	19.2271	1802	29	26	17816	AAAS,NUP107,NUP133,NUP153,NUP155,NUP160,NUP188,NUP205,NUP210,NUP214,NUP35,NUP37,NUP43,NUP50,NUP54,NUP58,NUP62,NUP85,NUP88,NUP93,NUP98,POM121,RAE1,RANBP2,SEH1L,TPR
GO:BP	multi-organism process	GO:0051704	8.23206e-20	19.0845	3028	29	29	17816	AAAS,ISG15,KPNA4,KPNA5,NUP107,NUP133,NUP153,NUP155,NUP160,NUP188,NUP205,NUP210,NUP214,NUP35,NUP37,NUP43,NUP50,NUP54,NUP58,NUP62,NUP85,NUP88,NUP93,NUP98,POM121,RAE1,RANBP2,SEH1L,TPR
GO:BP	organic substance catabolic process	GO:1901575	1.49605e-19	18.8251	2196	29	27	17816	AAAS,ISG15,NUP107,NUP133,NUP153,NUP155,NUP160,NUP188,NUP205,NUP210,NUP214,NUP35,NUP37,NUP43,NUP50,NUP54,NUP58,NUP62,NUP85,NUP88,NUP93,NUP98,POM121,RAE1,RANBP2,SEH1L,TPR
GO:BP	small molecule metabolic process	GO:0044281	7.59483e-19	18.1195	1989	29	26	17816	AAAS,NUP107,NUP133,NUP153,NUP155,NUP160,NUP188,NUP205,NUP210,NUP214,NUP35,NUP37,NUP43,NUP50,NUP54,NUP58,NUP62,NUP85,NUP88,NUP93,NUP98,POM121,RAE1,RANBP2,SEH1L,TPR
GO:BP	protein localization	GO:0008104	1.49843e-18	17.8244	2812	29	28	17816	AAAS,KPNA4,KPNA5,NUP107,NUP133,NUP153,NUP155,NUP160,NUP188,NUP205,NUP210,NUP214,NUP35,NUP37,NUP43,NUP50,NUP54,NUP58,NUP62,NUP85,NUP88,NUP93,NUP98,POM121,RAE1,RANBP2,SEH1L,TPR
GO:BP	negative regulation of gene expression	GO:0010629	2.62545e-18	17.5808	2087	29	26	17816	AAAS,NUP107,NUP133,NUP153,NUP155,NUP160,NUP188,NUP205,NUP210,NUP214,NUP35,NUP37,NUP43,NUP50,NUP54,NUP58,NUP62,NUP85,NUP88,NUP93,NUP98,POM121,RAE1,RANBP2,SEH1L,TPR
GO:BP	organic substance transport	GO:0071702	2.62569e-18	17.5808	2869	29	28	17816	AAAS,KPNA4,KPNA5,NUP107,NUP133,NUP153,NUP155,NUP160,NUP188,NUP205,NUP210,NUP214,NUP35,NUP37,NUP43,NUP50,NUP54,NUP58,NUP62,NUP85,NUP88,NUP93,NUP98,POM121,RAE1,RANBP2,SEH1L,TPR
GO:BP	cellular localization	GO:0051641	3.90355e-18	17.4085	2910	29	28	17816	AAAS,KPNA4,KPNA5,NUP107,NUP133,NUP153,NUP155,NUP160,NUP188,NUP205,NUP210,NUP214,NUP35,NUP37,NUP43,NUP50,NUP54,NUP58,NUP62,NUP85,NUP88,NUP93,NUP98,POM121,RAE1,RANBP2,SEH1L,TPR
GO:BP	catabolic process	GO:0009056	1.95444e-17	16.709	2633	29	27	17816	AAAS,ISG15,NUP107,NUP133,NUP153,NUP155,NUP160,NUP188,NUP205,NUP210,NUP214,NUP35,NUP37,NUP43,NUP50,NUP54,NUP58,NUP62,NUP85,NUP88,NUP93,NUP98,POM121,RAE1,RANBP2,SEH1L,TPR
GO:BP	macromolecule localization	GO:0033036	4.41296e-17	16.3553	3174	29	28	17816	AAAS,KPNA4,KPNA5,NUP107,NUP133,NUP153,NUP155,NUP160,NUP188,NUP205,NUP210,NUP214,NUP35,NUP37,NUP43,NUP50,NUP54,NUP58,NUP62,NUP85,NUP88,NUP93,NUP98,POM121,RAE1,RANBP2,SEH1L,TPR
GO:BP	phosphorylation	GO:0016310	1.59148e-16	15.7982	2448	29	26	17816	AAAS,NUP107,NUP133,NUP153,NUP155,NUP160,NUP188,NUP205,NUP210,NUP214,NUP35,NUP37,NUP43,NUP50,NUP54,NUP58,NUP62,NUP85,NUP88,NUP93,NUP98,POM121,RAE1,RANBP2,SEH1L,TPR
GO:BP	protein localization to organelle	GO:0033365	2.33079e-16	15.6325	931	29	20	17816	KPNA4,KPNA5,NUP107,NUP133,NUP153,NUP155,NUP188,NUP214,NUP35,NUP50,NUP54,NUP58,NUP62,NUP85,NUP88,NUP93,NUP98,POM121,RANBP2,TPR
GO:BP	negative regulation of macromolecule metabolic process	GO:0010605	3.84735e-16	15.4148	2943	29	27	17816	AAAS,ISG15,NUP107,NUP133,NUP153,NUP155,NUP160,NUP188,NUP205,NUP210,NUP214,NUP35,NUP37,NUP43,NUP50,NUP54,NUP58,NUP62,NUP85,NUP88,NUP93,NUP98,POM121,RAE1,RANBP2,SEH1L,TPR
GO:BP	negative regulation of metabolic process	GO:0009892	3.02163e-15	14.5198	3179	29	27	17816	AAAS,ISG15,NUP107,NUP133,NUP153,NUP155,NUP160,NUP188,NUP205,NUP210,NUP214,NUP35,NUP37,NUP43,NUP50,NUP54,NUP58,NUP62,NUP85,NUP88,NUP93,NUP98,POM121,RAE1,RANBP2,SEH1L,TPR
GO:BP	response to stress	GO:0006950	3.49355e-14	13.4567	4033	29	28	17816	AAAS,ISG15,KPNA4,NUP107,NUP133,NUP153,NUP155,NUP160,NUP188,NUP205,NUP210,NUP214,NUP35,NUP37,NUP43,NUP50,NUP54,NUP58,NUP62,NUP85,NUP88,NUP93,NUP98,POM121,RAE1,RANBP2,SEH1L,TPR
GO:BP	nucleus organization	GO:0006997	1.4354e-13	12.843	132	29	11	17816	NUP107,NUP133,NUP153,NUP155,NUP205,NUP35,NUP54,NUP93,NUP98,SEH1L,TPR
GO:BP	phosphate-containing compound metabolic process	GO:0006796	3.99417e-13	12.3986	3325	29	26	17816	AAAS,NUP107,NUP133,NUP153,NUP155,NUP160,NUP188,NUP205,NUP210,NUP214,NUP35,NUP37,NUP43,NUP50,NUP54,NUP58,NUP62,NUP85,NUP88,NUP93,NUP98,POM121,RAE1,RANBP2,SEH1L,TPR
GO:BP	phosphorus metabolic process	GO:0006793	4.86942e-13	12.3125	3351	29	26	17816	AAAS,NUP107,NUP133,NUP153,NUP155,NUP160,NUP188,NUP205,NUP210,NUP214,NUP35,NUP37,NUP43,NUP50,NUP54,NUP58,NUP62,NUP85,NUP88,NUP93,NUP98,POM121,RAE1,RANBP2,SEH1L,TPR
GO:BP	protein modification process	GO:0036211	4.77161e-12	11.3213	4193	29	27	17816	AAAS,ISG15,NUP107,NUP133,NUP153,NUP155,NUP160,NUP188,NUP205,NUP210,NUP214,NUP35,NUP37,NUP43,NUP50,NUP54,NUP58,NUP62,NUP85,NUP88,NUP93,NUP98,POM121,RAE1,RANBP2,SEH1L,TPR
GO:BP	cellular protein modification process	GO:0006464	4.77161e-12	11.3213	4193	29	27	17816	AAAS,ISG15,NUP107,NUP133,NUP153,NUP155,NUP160,NUP188,NUP205,NUP210,NUP214,NUP35,NUP37,NUP43,NUP50,NUP54,NUP58,NUP62,NUP85,NUP88,NUP93,NUP98,POM121,RAE1,RANBP2,SEH1L,TPR
GO:BP	macromolecule modification	GO:0043412	1.74016e-11	10.7594	4403	29	27	17816	AAAS,ISG15,NUP107,NUP133,NUP153,NUP155,NUP160,NUP188,NUP205,NUP210,NUP214,NUP35,NUP37,NUP43,NUP50,NUP54,NUP58,NUP62,NUP85,NUP88,NUP93,NUP98,POM121,RAE1,RANBP2,SEH1L,TPR
GO:BP	transport	GO:0006810	5.29179e-11	10.2764	5251	29	28	17816	AAAS,KPNA4,KPNA5,NUP107,NUP133,NUP153,NUP155,NUP160,NUP188,NUP205,NUP210,NUP214,NUP35,NUP37,NUP43,NUP50,NUP54,NUP58,NUP62,NUP85,NUP88,NUP93,NUP98,POM121,RAE1,RANBP2,SEH1L,TPR
GO:BP	regulation of nucleobase-containing compound metabolic process	GO:0019219	8.02362e-11	10.0956	4099	29	26	17816	AAAS,NUP107,NUP133,NUP153,NUP155,NUP160,NUP188,NUP205,NUP210,NUP214,NUP35,NUP37,NUP43,NUP50,NUP54,NUP58,NUP62,NUP85,NUP88,NUP93,NUP98,POM121,RAE1,RANBP2,SEH1L,TPR
GO:BP	establishment of localization	GO:0051234	9.78659e-11	10.0094	5369	29	28	17816	AAAS,KPNA4,KPNA5,NUP107,NUP133,NUP153,NUP155,NUP160,NUP188,NUP205,NUP210,NUP214,NUP35,NUP37,NUP43,NUP50,NUP54,NUP58,NUP62,NUP85,NUP88,NUP93,NUP98,POM121,RAE1,RANBP2,SEH1L,TPR
GO:BP	regulation of response to stimulus	GO:0048583	6.94821e-10	9.15813	4466	29	26	17816	AAAS,NUP107,NUP133,NUP153,NUP155,NUP160,NUP188,NUP205,NUP210,NUP214,NUP35,NUP37,NUP43,NUP50,NUP54,NUP58,NUP62,NUP85,NUP88,NUP93,NUP98,POM121,RAE1,RANBP2,SEH1L,TPR
GO:BP	nuclear pore complex assembly	GO:0051292	1.9162e-09	8.71756	9	29	5	17816	NUP107,NUP153,NUP205,NUP93,NUP98
GO:BP	regulation of gene expression	GO:0010468	2.28457e-09	8.6412	4683	29	26	17816	AAAS,NUP107,NUP133,NUP153,NUP155,NUP160,NUP188,NUP205,NUP210,NUP214,NUP35,NUP37,NUP43,NUP50,NUP54,NUP58,NUP62,NUP85,NUP88,NUP93,NUP98,POM121,RAE1,RANBP2,SEH1L,TPR
GO:BP	cellular protein metabolic process	GO:0044267	2.3792e-09	8.62357	5306	29	27	17816	AAAS,ISG15,NUP107,NUP133,NUP153,NUP155,NUP160,NUP188,NUP205,NUP210,NUP214,NUP35,NUP37,NUP43,NUP50,NUP54,NUP58,NUP62,NUP85,NUP88,NUP93,NUP98,POM121,RAE1,RANBP2,SEH1L,TPR
GO:BP	negative regulation of biological process	GO:0048519	6.68196e-09	8.1751	5519	29	27	17816	AAAS,ISG15,NUP107,NUP133,NUP153,NUP155,NUP160,NUP188,NUP205,NUP210,NUP214,NUP35,NUP37,NUP43,NUP50,NUP54,NUP58,NUP62,NUP85,NUP88,NUP93,NUP98,POM121,RAE1,RANBP2,SEH1L,TPR
GO:BP	nucleobase-containing compound metabolic process	GO:0006139	1.91126e-08	7.71868	5745	29	27	17816	AAAS,ISG15,NUP107,NUP133,NUP153,NUP155,NUP160,NUP188,NUP205,NUP210,NUP214,NUP35,NUP37,NUP43,NUP50,NUP54,NUP58,NUP62,NUP85,NUP88,NUP93,NUP98,POM121,RAE1,RANBP2,SEH1L,TPR
GO:BP	protein metabolic process	GO:0019538	3.7826e-08	7.42221	5897	29	27	17816	AAAS,ISG15,NUP107,NUP133,NUP153,NUP155,NUP160,NUP188,NUP205,NUP210,NUP214,NUP35,NUP37,NUP43,NUP50,NUP54,NUP58,NUP62,NUP85,NUP88,NUP93,NUP98,POM121,RAE1,RANBP2,SEH1L,TPR
GO:BP	regulation of nitrogen compound metabolic process	GO:0051171	4.13237e-08	7.3838	5917	29	27	17816	AAAS,ISG15,NUP107,NUP133,NUP153,NUP155,NUP160,NUP188,NUP205,NUP210,NUP214,NUP35,NUP37,NUP43,NUP50,NUP54,NUP58,NUP62,NUP85,NUP88,NUP93,NUP98,POM121,RAE1,RANBP2,SEH1L,TPR
GO:BP	heterocycle metabolic process	GO:0046483	4.18744e-08	7.37805	5920	29	27	17816	AAAS,ISG15,NUP107,NUP133,NUP153,NUP155,NUP160,NUP188,NUP205,NUP210,NUP214,NUP35,NUP37,NUP43,NUP50,NUP54,NUP58,NUP62,NUP85,NUP88,NUP93,NUP98,POM121,RAE1,RANBP2,SEH1L,TPR
GO:BP	pore complex assembly	GO:0046931	4.53626e-08	7.3433	15	29	5	17816	NUP107,NUP153,NUP205,NUP93,NUP98
GO:BP	cellular aromatic compound metabolic process	GO:0006725	4.99247e-08	7.30168	5960	29	27	17816	AAAS,ISG15,NUP107,NUP133,NUP153,NUP155,NUP160,NUP188,NUP205,NUP210,NUP214,NUP35,NUP37,NUP43,NUP50,NUP54,NUP58,NUP62,NUP85,NUP88,NUP93,NUP98,POM121,RAE1,RANBP2,SEH1L,TPR
GO:BP	localization	GO:0051179	5.41645e-08	7.26629	6751	29	28	17816	AAAS,KPNA4,KPNA5,NUP107,NUP133,NUP153,NUP155,NUP160,NUP188,NUP205,NUP210,NUP214,NUP35,NUP37,NUP43,NUP50,NUP54,NUP58,NUP62,NUP85,NUP88,NUP93,NUP98,POM121,RAE1,RANBP2,SEH1L,TPR
GO:BP	regulation of primary metabolic process	GO:0080090	8.84173e-08	7.05346	6092	29	27	17816	AAAS,ISG15,NUP107,NUP133,NUP153,NUP155,NUP160,NUP188,NUP205,NUP210,NUP214,NUP35,NUP37,NUP43,NUP50,NUP54,NUP58,NUP62,NUP85,NUP88,NUP93,NUP98,POM121,RAE1,RANBP2,SEH1L,TPR
GO:BP	organic cyclic compound metabolic process	GO:1901360	1.31228e-07	6.88197	6185	29	27	17816	AAAS,ISG15,NUP107,NUP133,NUP153,NUP155,NUP160,NUP188,NUP205,NUP210,NUP214,NUP35,NUP37,NUP43,NUP50,NUP54,NUP58,NUP62,NUP85,NUP88,NUP93,NUP98,POM121,RAE1,RANBP2,SEH1L,TPR
GO:BP	regulation of cellular metabolic process	GO:0031323	1.98428e-07	6.7024	6284	29	27	17816	AAAS,ISG15,NUP107,NUP133,NUP153,NUP155,NUP160,NUP188,NUP205,NUP210,NUP214,NUP35,NUP37,NUP43,NUP50,NUP54,NUP58,NUP62,NUP85,NUP88,NUP93,NUP98,POM121,RAE1,RANBP2,SEH1L,TPR
GO:BP	gene expression	GO:0010467	2.32471e-07	6.63363	5638	29	26	17816	AAAS,NUP107,NUP133,NUP153,NUP155,NUP160,NUP188,NUP205,NUP210,NUP214,NUP35,NUP37,NUP43,NUP50,NUP54,NUP58,NUP62,NUP85,NUP88,NUP93,NUP98,POM121,RAE1,RANBP2,SEH1L,TPR
GO:BP	regulation of macromolecule metabolic process	GO:0060255	2.39896e-07	6.61998	6330	29	27	17816	AAAS,ISG15,NUP107,NUP133,NUP153,NUP155,NUP160,NUP188,NUP205,NUP210,NUP214,NUP35,NUP37,NUP43,NUP50,NUP54,NUP58,NUP62,NUP85,NUP88,NUP93,NUP98,POM121,RAE1,RANBP2,SEH1L,TPR
GO:BP	transcription-dependent tethering of RNA polymerase II gene DNA at nuclear periphery	GO:0000972	3.79664e-07	6.4206	7	29	4	17816	NUP107,NUP155,NUP98,RAE1
GO:BP	cellular nitrogen compound metabolic process	GO:0034641	4.66409e-07	6.33123	6494	29	27	17816	AAAS,ISG15,NUP107,NUP133,NUP153,NUP155,NUP160,NUP188,NUP205,NUP210,NUP214,NUP35,NUP37,NUP43,NUP50,NUP54,NUP58,NUP62,NUP85,NUP88,NUP93,NUP98,POM121,RAE1,RANBP2,SEH1L,TPR
GO:BP	NLS-bearing protein import into nucleus	GO:0006607	5.03745e-07	6.29779	23	29	5	17816	KPNA4,KPNA5,NUP35,NUP54,RANBP2
GO:BP	regulation of nucleocytoplasmic transport	GO:0046822	7.09237e-07	6.14921	109	29	7	17816	AAAS,NUP153,NUP214,NUP54,NUP58,NUP62,TPR
GO:BP	organonitrogen compound metabolic process	GO:1901564	1.78472e-06	5.74843	6839	29	27	17816	AAAS,ISG15,NUP107,NUP133,NUP153,NUP155,NUP160,NUP188,NUP205,NUP210,NUP214,NUP35,NUP37,NUP43,NUP50,NUP54,NUP58,NUP62,NUP85,NUP88,NUP93,NUP98,POM121,RAE1,RANBP2,SEH1L,TPR
GO:BP	regulation of metabolic process	GO:0019222	1.8326e-06	5.73693	6846	29	27	17816	AAAS,ISG15,NUP107,NUP133,NUP153,NUP155,NUP160,NUP188,NUP205,NUP210,NUP214,NUP35,NUP37,NUP43,NUP50,NUP54,NUP58,NUP62,NUP85,NUP88,NUP93,NUP98,POM121,RAE1,RANBP2,SEH1L,TPR
GO:BP	cellular response to stimulus	GO:0051716	2.98346e-05	4.52528	7629	29	27	17816	AAAS,ISG15,NUP107,NUP133,NUP153,NUP155,NUP160,NUP188,NUP205,NUP210,NUP214,NUP35,NUP37,NUP43,NUP50,NUP54,NUP58,NUP62,NUP85,NUP88,NUP93,NUP98,POM121,RAE1,RANBP2,SEH1L,TPR
GO:BP	response to stimulus	GO:0050896	0.000350986	3.45471	9313	29	28	17816	AAAS,ISG15,KPNA4,NUP107,NUP133,NUP153,NUP155,NUP160,NUP188,NUP205,NUP210,NUP214,NUP35,NUP37,NUP43,NUP50,NUP54,NUP58,NUP62,NUP85,NUP88,NUP93,NUP98,POM121,RAE1,RANBP2,SEH1L,TPR
GO:BP	cellular macromolecule metabolic process	GO:0044260	0.000357547	3.44667	8409	29	27	17816	AAAS,ISG15,NUP107,NUP133,NUP153,NUP155,NUP160,NUP188,NUP205,NUP210,NUP214,NUP35,NUP37,NUP43,NUP50,NUP54,NUP58,NUP62,NUP85,NUP88,NUP93,NUP98,POM121,RAE1,RANBP2,SEH1L,TPR
GO:BP	regulation of intracellular transport	GO:0032386	0.00196002	2.70774	344	29	7	17816	AAAS,NUP153,NUP214,NUP54,NUP58,NUP62,TPR
GO:BP	protein heterotrimerization	GO:0070208	0.00210945	2.67583	13	29	3	17816	NUP54,NUP58,NUP62
GO:BP	regulation of protein import into nucleus	GO:0042306	0.00434601	2.36191	58	29	4	17816	NUP54,NUP58,NUP62,TPR
GO:BP	protein localization to nuclear inner membrane	GO:0036228	0.0049199	2.30804	2	29	2	17816	NUP155,NUP54
GO:BP	negative regulation of nucleobase-containing compound transport	GO:0032240	0.0049199	2.30804	2	29	2	17816	NUP153,TPR
GO:BP	negative regulation of RNA export from nucleus	GO:0046832	0.0049199	2.30804	2	29	2	17816	NUP153,TPR
GO:BP	regulation of protein import	GO:1904589	0.00532763	2.27347	61	29	4	17816	NUP54,NUP58,NUP62,TPR
GO:BP	macromolecule metabolic process	GO:0043170	0.00868377	2.06129	9546	29	27	17816	AAAS,ISG15,NUP107,NUP133,NUP153,NUP155,NUP160,NUP188,NUP205,NUP210,NUP214,NUP35,NUP37,NUP43,NUP50,NUP54,NUP58,NUP62,NUP85,NUP88,NUP93,NUP98,POM121,RAE1,RANBP2,SEH1L,TPR
GO:BP	posttranscriptional tethering of RNA polymerase II gene DNA at nuclear periphery	GO:0000973	0.0147448	1.83136	3	29	2	17816	NUP107,NUP98
GO:BP	nitrogen compound metabolic process	GO:0006807	0.0334509	1.47559	10080	29	27	17816	AAAS,ISG15,NUP107,NUP133,NUP153,NUP155,NUP160,NUP188,NUP205,NUP210,NUP214,NUP35,NUP37,NUP43,NUP50,NUP54,NUP58,NUP62,NUP85,NUP88,NUP93,NUP98,POM121,RAE1,RANBP2,SEH1L,TPR
GO:CC	host cell	GO:0043657	1.88005e-60	59.7258	69	29	26	18797	AAAS,NUP107,NUP133,NUP153,NUP155,NUP160,NUP188,NUP205,NUP210,NUP214,NUP35,NUP37,NUP43,NUP50,NUP54,NUP58,NUP62,NUP85,NUP88,NUP93,NUP98,POM121,RAE1,RANBP2,SEH1L,TPR
GO:CC	nuclear pore	GO:0005643	2.94468e-60	59.531	90	29	27	18797	AAAS,KPNA5,NUP107,NUP133,NUP153,NUP155,NUP160,NUP188,NUP205,NUP210,NUP214,NUP35,NUP37,NUP43,NUP50,NUP54,NUP58,NUP62,NUP85,NUP88,NUP93,NUP98,POM121,RAE1,RANBP2,SEH1L,TPR
GO:CC	other organism part	GO:0044217	2.70466e-59	58.5679	75	29	26	18797	AAAS,NUP107,NUP133,NUP153,NUP155,NUP160,NUP188,NUP205,NUP210,NUP214,NUP35,NUP37,NUP43,NUP50,NUP54,NUP58,NUP62,NUP85,NUP88,NUP93,NUP98,POM121,RAE1,RANBP2,SEH1L,TPR
GO:CC	other organism cell	GO:0044216	2.70466e-59	58.5679	75	29	26	18797	AAAS,NUP107,NUP133,NUP153,NUP155,NUP160,NUP188,NUP205,NUP210,NUP214,NUP35,NUP37,NUP43,NUP50,NUP54,NUP58,NUP62,NUP85,NUP88,NUP93,NUP98,POM121,RAE1,RANBP2,SEH1L,TPR
GO:CC	nuclear envelope	GO:0005635	3.33463e-42	41.477	466	29	28	18797	AAAS,KPNA4,KPNA5,NUP107,NUP133,NUP153,NUP155,NUP160,NUP188,NUP205,NUP210,NUP214,NUP35,NUP37,NUP43,NUP50,NUP54,NUP58,NUP62,NUP85,NUP88,NUP93,NUP98,POM121,RAE1,RANBP2,SEH1L,TPR
GO:CC	envelope	GO:0031975	1.4732e-30	29.8317	1194	29	28	18797	AAAS,KPNA4,KPNA5,NUP107,NUP133,NUP153,NUP155,NUP160,NUP188,NUP205,NUP210,NUP214,NUP35,NUP37,NUP43,NUP50,NUP54,NUP58,NUP62,NUP85,NUP88,NUP93,NUP98,POM121,RAE1,RANBP2,SEH1L,TPR
GO:CC	organelle envelope	GO:0031967	1.4732e-30	29.8317	1194	29	28	18797	AAAS,KPNA4,KPNA5,NUP107,NUP133,NUP153,NUP155,NUP160,NUP188,NUP205,NUP210,NUP214,NUP35,NUP37,NUP43,NUP50,NUP54,NUP58,NUP62,NUP85,NUP88,NUP93,NUP98,POM121,RAE1,RANBP2,SEH1L,TPR
GO:CC	nuclear membrane	GO:0031965	2.05669e-25	24.6868	303	29	19	18797	AAAS,KPNA4,NUP107,NUP133,NUP153,NUP155,NUP205,NUP210,NUP35,NUP50,NUP54,NUP58,NUP62,NUP85,NUP93,NUP98,POM121,RANBP2,TPR
GO:CC	nuclear pore outer ring	GO:0031080	1.20058e-19	18.9206	10	29	8	18797	NUP107,NUP133,NUP160,NUP37,NUP43,NUP85,NUP98,SEH1L
GO:CC	nuclear part	GO:0044428	2.53771e-16	15.5956	4521	29	29	18797	AAAS,ISG15,KPNA4,KPNA5,NUP107,NUP133,NUP153,NUP155,NUP160,NUP188,NUP205,NUP210,NUP214,NUP35,NUP37,NUP43,NUP50,NUP54,NUP58,NUP62,NUP85,NUP88,NUP93,NUP98,POM121,RAE1,RANBP2,SEH1L,TPR
GO:CC	endomembrane system	GO:0012505	1.5807e-14	13.8012	4456	29	28	18797	AAAS,KPNA4,KPNA5,NUP107,NUP133,NUP153,NUP155,NUP160,NUP188,NUP205,NUP210,NUP214,NUP35,NUP37,NUP43,NUP50,NUP54,NUP58,NUP62,NUP85,NUP88,NUP93,NUP98,POM121,RAE1,RANBP2,SEH1L,TPR
GO:CC	kinetochore	GO:0000776	8.27364e-11	10.0823	135	29	9	18797	NUP107,NUP133,NUP160,NUP37,NUP43,NUP85,NUP98,SEH1L,TPR
GO:CC	protein-containing complex	GO:0032991	1.10116e-10	9.95815	5390	29	27	18797	AAAS,KPNA5,NUP107,NUP133,NUP153,NUP155,NUP160,NUP188,NUP205,NUP210,NUP214,NUP35,NUP37,NUP43,NUP50,NUP54,NUP58,NUP62,NUP85,NUP88,NUP93,NUP98,POM121,RAE1,RANBP2,SEH1L,TPR
GO:CC	nucleus	GO:0005634	3.98091e-10	9.40002	7385	29	29	18797	AAAS,ISG15,KPNA4,KPNA5,NUP107,NUP133,NUP153,NUP155,NUP160,NUP188,NUP205,NUP210,NUP214,NUP35,NUP37,NUP43,NUP50,NUP54,NUP58,NUP62,NUP85,NUP88,NUP93,NUP98,POM121,RAE1,RANBP2,SEH1L,TPR
GO:CC	nuclear pore nuclear basket	GO:0044615	1.1482e-09	8.93998	12	29	5	18797	NUP153,NUP35,NUP98,RANBP2,TPR
GO:CC	chromosome, centromeric region	GO:0000775	2.32718e-09	8.63317	195	29	9	18797	NUP107,NUP133,NUP160,NUP37,NUP43,NUP85,NUP98,SEH1L,TPR
GO:CC	nuclear pore central transport channel	GO:0044613	3.83058e-08	7.41673	7	29	4	18797	NUP153,NUP35,NUP54,NUP62
GO:CC	intracellular organelle part	GO:0044446	3.06924e-07	6.51297	9284	29	29	18797	AAAS,ISG15,KPNA4,KPNA5,NUP107,NUP133,NUP153,NUP155,NUP160,NUP188,NUP205,NUP210,NUP214,NUP35,NUP37,NUP43,NUP50,NUP54,NUP58,NUP62,NUP85,NUP88,NUP93,NUP98,POM121,RAE1,RANBP2,SEH1L,TPR
GO:CC	nuclear periphery	GO:0034399	3.07272e-07	6.51248	137	29	7	18797	NUP107,NUP153,NUP205,NUP35,NUP93,NUP98,TPR
GO:CC	chromosomal region	GO:0098687	4.00373e-07	6.39753	348	29	9	18797	NUP107,NUP133,NUP160,NUP37,NUP43,NUP85,NUP98,SEH1L,TPR
GO:CC	nuclear inclusion body	GO:0042405	5.38877e-07	6.26851	12	29	4	18797	NUP153,NUP98,RANBP2,TPR
GO:CC	organelle part	GO:0044422	7.80033e-07	6.10789	9587	29	29	18797	AAAS,ISG15,KPNA4,KPNA5,NUP107,NUP133,NUP153,NUP155,NUP160,NUP188,NUP205,NUP210,NUP214,NUP35,NUP37,NUP43,NUP50,NUP54,NUP58,NUP62,NUP85,NUP88,NUP93,NUP98,POM121,RAE1,RANBP2,SEH1L,TPR
GO:CC	organelle membrane	GO:0031090	8.77816e-07	6.0566	3473	29	20	18797	AAAS,KPNA4,NUP107,NUP133,NUP153,NUP155,NUP205,NUP210,NUP35,NUP50,NUP54,NUP58,NUP62,NUP85,NUP93,NUP98,POM121,RANBP2,SEH1L,TPR
GO:CC	condensed chromosome kinetochore	GO:0000777	2.70539e-06	5.56777	105	29	6	18797	NUP107,NUP133,NUP37,NUP43,NUP85,SEH1L
GO:CC	nuclear pore inner ring	GO:0044611	3.17131e-06	5.49876	4	29	3	18797	NUP155,NUP188,NUP205
GO:CC	condensed chromosome, centromeric region	GO:0000779	5.46404e-06	5.26249	118	29	6	18797	NUP107,NUP133,NUP37,NUP43,NUP85,SEH1L
GO:CC	intracellular membrane-bounded organelle	GO:0043231	3.75296e-05	4.42563	10955	29	29	18797	AAAS,ISG15,KPNA4,KPNA5,NUP107,NUP133,NUP153,NUP155,NUP160,NUP188,NUP205,NUP210,NUP214,NUP35,NUP37,NUP43,NUP50,NUP54,NUP58,NUP62,NUP85,NUP88,NUP93,NUP98,POM121,RAE1,RANBP2,SEH1L,TPR
GO:CC	condensed chromosome	GO:0000793	0.0002308	3.63676	222	29	6	18797	NUP107,NUP133,NUP37,NUP43,NUP85,SEH1L
GO:CC	membrane-bounded organelle	GO:0043227	0.0015362	2.81355	12449	29	29	18797	AAAS,ISG15,KPNA4,KPNA5,NUP107,NUP133,NUP153,NUP155,NUP160,NUP188,NUP205,NUP210,NUP214,NUP35,NUP37,NUP43,NUP50,NUP54,NUP58,NUP62,NUP85,NUP88,NUP93,NUP98,POM121,RAE1,RANBP2,SEH1L,TPR
GO:CC	inclusion body	GO:0016234	0.00176734	2.75268	82	29	4	18797	NUP153,NUP98,RANBP2,TPR
GO:CC	chromosomal part	GO:0044427	0.00201104	2.69658	951	29	9	18797	NUP107,NUP133,NUP160,NUP37,NUP43,NUP85,NUP98,SEH1L,TPR
GO:CC	intracellular organelle	GO:0043229	0.00287064	2.54202	12720	29	29	18797	AAAS,ISG15,KPNA4,KPNA5,NUP107,NUP133,NUP153,NUP155,NUP160,NUP188,NUP205,NUP210,NUP214,NUP35,NUP37,NUP43,NUP50,NUP54,NUP58,NUP62,NUP85,NUP88,NUP93,NUP98,POM121,RAE1,RANBP2,SEH1L,TPR
GO:CC	nuclear pore cytoplasmic filaments	GO:0044614	0.00330847	2.48037	4	29	2	18797	NUP98,RANBP2
GO:CC	nuclear lumen	GO:0031981	0.00515887	2.28745	4142	29	17	18797	AAAS,ISG15,KPNA4,KPNA5,NUP107,NUP153,NUP205,NUP214,NUP35,NUP37,NUP50,NUP88,NUP93,NUP98,POM121,RAE1,TPR
GO:CC	chromosome	GO:0005694	0.00533981	2.27247	1074	29	9	18797	NUP107,NUP133,NUP160,NUP37,NUP43,NUP85,NUP98,SEH1L,TPR
GO:CC	annulate lamellae	GO:0005642	0.00550884	2.25894	5	29	2	18797	NUP62,RANBP2
GO:CC	organelle	GO:0043226	0.0185337	1.73204	13564	29	29	18797	AAAS,ISG15,KPNA4,KPNA5,NUP107,NUP133,NUP153,NUP155,NUP160,NUP188,NUP205,NUP210,NUP214,NUP35,NUP37,NUP43,NUP50,NUP54,NUP58,NUP62,NUP85,NUP88,NUP93,NUP98,POM121,RAE1,RANBP2,SEH1L,TPR
KEGG	RNA transport	KEGG:03013	4.4026e-42	41.3563	159	27	26	7590	AAAS,NUP107,NUP133,NUP153,NUP155,NUP160,NUP188,NUP205,NUP210,NUP214,NUP35,NUP37,NUP43,NUP50,NUP54,NUP58,NUP62,NUP85,NUP88,NUP93,NUP98,POM121,RAE1,RANBP2,SEH1L,TPR
