# Supplementary material for: Value of KPNA4 as a diagnostic and prognostic biomarker for hepatocellular carcinoma
Source: Aging (Albany NY). 2021 Feb 1;13(4):5263–83. doi: 10.18632/aging.202447 (PMC7950262; doi:10.18632/aging.202447)
Supplement: Supplementary Table 3 [file aging-13-202447-s004.xlsx]

## Sheet: lo_result_35013
Supplementary Table 3. Significant gene sets positively or negatively correlated with KPNA4.
Query	Statistic	P-value	FDR (BH)	Event_SD	Event_TD
KPNA4	1	1e-30	1e-26	371	371
ARMC8	0.543066	7.59426e-30	7.56465e-26	371	371
VRK2	0.523328	1.79174e-27	9.67378e-24	371	371
PRKCI	0.523026	1.94233e-27	9.67378e-24	371	371
PDCD10	0.520449	3.85896e-27	1.40058e-23	371	371
COMMD2	0.520113	4.21819e-27	1.40058e-23	371	371
GMPS	0.518598	6.29545e-27	1.79169e-23	371	371
SELT	0.51423	1.97555e-26	4.91961e-23	371	371
PHC3	0.513214	2.57114e-26	5.69137e-23	371	371
PCNP	0.508389	8.88156e-26	1.76938e-22	371	371
FNDC3B	0.504366	2.45999e-25	4.2672e-22	371	371
MYNN	0.504192	2.57035e-25	4.2672e-22	371	371
ZNF639	0.502884	3.56879e-25	5.46904e-22	371	371
PAK2	0.501813	4.66386e-25	6.63667e-22	371	371
CAPRIN1	0.498668	1.01771e-24	1.32504e-21	371	371
RYK	0.498487	1.06419e-24	1.32504e-21	371	371
EIF4G2	0.490433	7.5629e-24	8.86283e-21	371	371
SKIL	0.489321	9.87492e-24	1.09293e-20	371	371
DHX36	0.487172	1.64888e-23	1.7289e-20	371	371
RSRC1	0.482708	4.72785e-23	4.70941e-20	371	371
NAA50	0.480556	7.81304e-23	7.41197e-20	371	371
WDR43	0.476184	2.14444e-22	1.94188e-19	371	371
PPP1CB	0.475609	2.44683e-22	2.11938e-19	371	371
ACTR2	0.474563	3.10692e-22	2.47584e-19	371	371
MFN1	0.471441	6.30904e-22	4.83418e-19	371	371
ZBTB11	0.470556	7.70245e-22	5.68327e-19	371	371
TBL1XR1	0.469476	9.81774e-22	6.98533e-19	371	371
RAB21	0.467949	1.38154e-21	9.49067e-19	371	371
ACAP2	0.462234	4.88768e-21	3.14105e-18	371	371
MBNL1	0.460151	7.70273e-21	4.65012e-18	371	371
ACTL6A	0.459473	8.92361e-21	5.22871e-18	371	371
HIF1A	0.458378	1.13141e-20	6.43998e-18	371	371
AGFG1	0.457404	1.39629e-20	7.62674e-18	371	371
NEDD1	0.457337	1.41647e-20	7.62674e-18	371	371
PRPF40A	0.457122	1.48375e-20	7.77875e-18	371	371
COPB2	0.455716	2.00715e-20	1.02529e-17	371	371
SMC4	0.454857	2.41203e-20	1.20131e-17	371	371
DNM1L	0.454673	2.50884e-20	1.21905e-17	371	371
ROD1	0.453285	3.37237e-20	1.56243e-17	371	371
MOBKL3	0.45275	3.77881e-20	1.71094e-17	371	371
DNAJC13	0.451861	4.56265e-20	2.01994e-17	371	371
C9orf80	0.450258	6.39954e-20	2.77156e-17	371	371
ATP2C1	0.449606	7.33979e-20	3.11114e-17	371	371
HNRPLL	0.446064	1.53839e-19	6.38495e-17	371	371
TWF1	0.445438	1.75142e-19	7.12079e-17	371	371
TMF1	0.444767	2.01268e-19	8.01933e-17	371	371
ATR	0.444351	2.19309e-19	8.47486e-17	371	371
QSER1	0.44431	2.21209e-19	8.47486e-17	371	371
ACTR3	0.443044	2.87122e-19	1.07925e-16	371	371
FYTTD1	0.442477	3.22557e-19	1.19e-16	371	371
ECT2	0.442102	3.48385e-19	1.26191e-16	371	371
PAPOLG	0.441183	4.20461e-19	1.46955e-16	371	371
UBE2D1	0.440304	5.03097e-19	1.72805e-16	371	371
AEBP2	0.439969	5.38563e-19	1.81852e-16	371	371
RAP1B	0.43588	1.23094e-18	3.8317e-16	371	371
NCKAP1	0.432924	2.22236e-18	6.81136e-16	371	371
G2E3	0.432733	2.30833e-18	6.96766e-16	371	371
CHORDC1	0.432213	2.55934e-18	7.59328e-16	371	371
TOPBP1	0.432149	2.59182e-18	7.59328e-16	371	371
NCK1	0.43184	2.75554e-18	7.95592e-16	371	371
FBXO30	0.431528	2.93142e-18	8.34283e-16	371	371
PAPOLA	0.430647	3.48885e-18	9.78943e-16	371	371
UBA3	0.429791	4.13008e-18	1.14277e-15	371	371
MEX3C	0.42942	4.44259e-18	1.19602e-15	371	371
NCBP2	0.428664	5.15342e-18	1.36889e-15	371	371
HIATL1	0.428494	5.32718e-18	1.39642e-15	371	371
SOCS4	0.426863	7.32764e-18	1.89586e-15	371	371
KIF5B	0.426725	7.52652e-18	1.92235e-15	371	371
ZNF148	0.426622	7.67957e-18	1.93661e-15	371	371
C10orf18	0.426034	8.6111e-18	2.1179e-15	371	371
SLC4A7	0.425782	9.04267e-18	2.19693e-15	371	371
NAA25	0.425541	9.4762e-18	2.27452e-15	371	371
MOBKL1B	0.425084	1.03539e-17	2.43313e-15	371	371
CLASP2	0.425021	1.04809e-17	2.43313e-15	371	371
FSD1L	0.42501	1.05034e-17	2.43313e-15	371	370
ZNF765	0.424617	1.13336e-17	2.56577e-15	371	371
LUZP6	0.424188	1.23123e-17	2.72539e-15	371	371
GNA13	0.423647	1.36677e-17	2.99218e-15	371	371
KIF2A	0.422655	1.65451e-17	3.51108e-15	371	371
RBM12	0.422648	1.65667e-17	3.51108e-15	371	371
PPP2R5E	0.421646	2.00783e-17	4.16666e-15	371	371
MRPL3	0.421524	2.05518e-17	4.22096e-15	371	371
CAND1	0.420705	2.40348e-17	4.88594e-15	371	371
PRMT3	0.420328	2.58285e-17	5.19754e-15	371	371
MXD1	0.419834	2.83761e-17	5.6531e-15	371	371
DBR1	0.419777	2.86852e-17	5.65808e-15	371	371
R3HDM1	0.419017	3.31453e-17	6.47373e-15	371	371
MRPL42	0.41879	3.46077e-17	6.69374e-15	371	371
ADAM9	0.418678	3.53503e-17	6.77162e-15	371	371
UBXN7	0.417319	4.57111e-17	8.67292e-15	371	371
XPO1	0.417069	4.79222e-17	8.96675e-15	371	371
ZNF93	0.417043	4.816e-17	8.96675e-15	371	366
TNPO1	0.416128	5.72109e-17	1.04565e-14	371	371
BBX	0.415237	6.76274e-17	1.22479e-14	371	371
SR140	0.413966	8.57876e-17	1.53969e-14	371	371
PHTF2	0.413875	8.72565e-17	1.55207e-14	371	371
GDAP2	0.413468	9.41326e-17	1.65957e-14	371	371
SMAD2	0.41326	9.7858e-17	1.71011e-14	371	371
TRIP12	0.412907	1.04512e-16	1.80771e-14	371	371
SMNDC1	0.412868	1.05258e-16	1.80771e-14	371	371
PPP1R12A	0.41268	1.09008e-16	1.85612e-14	371	371
PTPN12	0.412424	1.14315e-16	1.92999e-14	371	371
HAUS6	0.411827	1.27708e-16	2.10264e-14	371	371
QTRTD1	0.410655	1.58648e-16	2.56958e-14	371	371
ZNF460	0.41012	1.75082e-16	2.76824e-14	371	371
RAB10	0.409457	1.97803e-16	3.08149e-14	371	371
PIK3CA	0.409452	1.97987e-16	3.08149e-14	371	371
DR1	0.408467	2.37257e-16	3.66405e-14	371	371
CTDSPL2	0.407515	2.82378e-16	4.32734e-14	371	371
LOC646214	0.407218	2.98157e-16	4.53426e-14	371	371
ARL5A	0.40687	3.17662e-16	4.79429e-14	371	371
2019-03-07	0.406668	3.296e-16	4.93706e-14	371	371
RAB5A	0.405698	3.93204e-16	5.76328e-14	371	371
RIF1	0.405694	3.93437e-16	5.76328e-14	371	371
ACER3	0.404773	4.64971e-16	6.71243e-14	371	371
ZNF845	0.404506	4.8794e-16	6.99334e-14	371	371
TDG	0.404015	5.33252e-16	7.58817e-14	371	371
ZDHHC21	0.40387	5.47396e-16	7.7342e-14	371	370
MTMR2	0.403768	5.57558e-16	7.82231e-14	371	371
SP3	0.403556	5.79312e-16	8.07067e-14	371	371
SMCHD1	0.403286	6.08155e-16	8.30944e-14	371	371
CREB1	0.403279	6.08964e-16	8.30944e-14	371	371
USP14	0.402971	6.43607e-16	8.60533e-14	371	371
GABPB1	0.402837	6.59369e-16	8.7573e-14	371	371
MRE11A	0.401881	7.82841e-16	1.02203e-13	371	371
KRR1	0.401841	7.8843e-16	1.02203e-13	371	371
RNF138	0.40183	7.90046e-16	1.02203e-13	371	371
TAF1B	0.401374	8.57274e-16	1.10185e-13	371	371
SH3GLB1	0.401185	8.86721e-16	1.1252e-13	371	371
MALT1	0.401185	8.86738e-16	1.1252e-13	371	371
SOCS5	0.401089	9.02117e-16	1.13747e-13	371	371
TOP2B	0.400444	1.01228e-15	1.26041e-13	371	371
C5orf22	0.400215	1.05445e-15	1.29715e-13	371	371
CCDC52	0.399965	1.10252e-15	1.33232e-13	371	371
VCL	0.399921	1.11108e-15	1.33232e-13	371	371
CDK2AP1	0.399892	1.11685e-15	1.33232e-13	371	371
CCDC50	0.399748	1.14584e-15	1.35878e-13	371	371
VEZT	0.399625	1.17126e-15	1.38071e-13	371	371
RECQL	0.39929	1.24308e-15	1.45674e-13	371	371
ERI1	0.397287	1.77263e-15	2.05316e-13	371	371
DNAJC10	0.396712	1.96172e-15	2.23323e-13	371	371
FBXO45	0.396589	2.00473e-15	2.26922e-13	371	371
TCERG1	0.396408	2.06943e-15	2.32174e-13	371	371
C3orf17	0.396394	2.07444e-15	2.32174e-13	371	371
SAMD8	0.396228	2.13628e-15	2.3776e-13	371	371
SET	0.39618	2.1542e-15	2.38422e-13	371	371
LPP	0.396142	2.16851e-15	2.3868e-13	371	371
HNRNPR	0.3956	2.38529e-15	2.59927e-13	371	371
FBXO11	0.395594	2.38765e-15	2.59927e-13	371	371
RANBP2	0.395288	2.51948e-15	2.71314e-13	371	371
TRA2B	0.394105	3.09881e-15	3.31906e-13	371	371
UBA2	0.393904	3.20966e-15	3.39167e-13	371	371
HNRNPK	0.393889	3.21768e-15	3.39167e-13	371	371
BICD1	0.393799	3.26866e-15	3.42727e-13	371	367
LIMS1	0.393303	3.56378e-15	3.69779e-13	371	371
HNRNPU	0.39324	3.60353e-15	3.70352e-13	371	371
EXOC5	0.393235	3.60648e-15	3.70352e-13	371	371
CAB39	0.392771	3.90971e-15	3.99432e-13	371	371
ZBTB2	0.391938	4.51783e-15	4.56874e-13	371	371
WRN	0.391855	4.58308e-15	4.58225e-13	371	371
BTBD10	0.391834	4.60019e-15	4.58225e-13	371	371
SPAST	0.391495	4.87809e-15	4.83085e-13	371	371
C3orf63	0.391455	4.91222e-15	4.83085e-13	371	371
GTF3C4	0.391354	4.99847e-15	4.88134e-13	371	371
C14orf106	0.391064	5.25559e-15	5.08262e-13	371	371
CTTNBP2NL	0.390335	5.96093e-15	5.682e-13	371	371
CD2AP	0.389802	6.53356e-15	6.19817e-13	371	371
PLOD2	0.389332	7.08416e-15	6.6571e-13	371	371
DYNC1LI1	0.389276	7.15222e-15	6.6895e-13	371	371
XPOT	0.38919	7.25829e-15	6.73469e-13	371	371
DHX15	0.389182	7.26814e-15	6.73469e-13	371	371
PPHLN1	0.388924	7.59725e-15	6.97477e-13	371	371
GYG1	0.388715	7.8751e-15	7.19668e-13	371	371
CDYL	0.388631	7.98934e-15	7.26775e-13	371	371
SWAP70	0.388554	8.0948e-15	7.33021e-13	371	371
UBE2E1	0.388478	8.20186e-15	7.37688e-13	371	371
CCAR1	0.388464	8.22039e-15	7.37688e-13	371	371
NUP205	0.388413	8.293e-15	7.40866e-13	371	371
ZNF131	0.388279	8.48582e-15	7.54707e-13	371	371
DCAF17	0.387983	8.92596e-15	7.86828e-13	371	371
SENP1	0.387739	9.30678e-15	8.16783e-13	371	371
ZNF708	0.387542	9.62616e-15	8.37434e-13	371	371
ADAM17	0.387254	1.01101e-14	8.75707e-13	371	371
PRDM4	0.387069	1.04349e-14	8.99928e-13	371	371
TMEM87B	0.387027	1.05097e-14	9.02477e-13	371	371
NAA35	0.386527	1.14432e-14	9.7565e-13	371	371
2019-09-02	0.386519	1.14598e-14	9.7565e-13	371	371
ATP11B	0.385891	1.27494e-14	1.06854e-12	371	371
ZNF92	0.385884	1.27655e-14	1.06854e-12	371	371
FAM116A	0.385683	1.3208e-14	1.09637e-12	371	371
UEVLD	0.385597	1.34031e-14	1.10795e-12	371	371
E2F3	0.384915	1.50436e-14	1.23332e-12	371	371
APPL1	0.384805	1.53284e-14	1.25153e-12	371	371
GK5	0.384659	1.5709e-14	1.27737e-12	371	371
YEATS2	0.384496	1.61505e-14	1.30608e-12	371	371
MAPRE1	0.384281	1.67454e-14	1.34192e-12	371	371
KDM3A	0.384013	1.75213e-14	1.39624e-12	371	371
BAZ1A	0.38385	1.80089e-14	1.42938e-12	371	371
HSPA14	0.383321	1.96874e-14	1.5564e-12	371	371
TRIM59	0.383285	1.98071e-14	1.55967e-12	371	370
HSN2	0.383119	2.03703e-14	1.5977e-12	371	344
GTF2E1	0.382984	2.08377e-14	1.62795e-12	371	371
AMD1	0.382732	2.1739e-14	1.69173e-12	371	371
SSR3	0.382544	2.24378e-14	1.73933e-12	371	371
LATS1	0.382123	2.40773e-14	1.84487e-12	371	371
KRAS	0.381849	2.52081e-14	1.92412e-12	371	371
PPP1R2	0.381546	2.65217e-14	2.01666e-12	371	371
CKAP5	0.381328	2.75057e-14	2.08353e-12	371	371
ARL13B	0.381206	2.80713e-14	2.11033e-12	371	371
CORO1C	0.381159	2.82952e-14	2.11916e-12	371	371
WHSC1L1	0.381102	2.85659e-14	2.13142e-12	371	371
EEA1	0.380796	3.00603e-14	2.23456e-12	371	371
CEP170	0.380119	3.36549e-14	2.47407e-12	371	371
CDK17	0.379932	3.47144e-14	2.54258e-12	371	371
CNOT6	0.37952	3.71767e-14	2.70689e-12	371	371
2019-09-07	0.379512	3.72296e-14	2.70689e-12	371	371
DCP1A	0.379468	3.75029e-14	2.71684e-12	371	371
IFT57	0.379424	3.77775e-14	2.72682e-12	371	371
FXR1	0.379347	3.82614e-14	2.75178e-12	371	371
MATR3	0.379049	4.02023e-14	2.87065e-12	371	371
PELI1	0.378164	4.65454e-14	3.2766e-12	371	371
YES1	0.377823	4.92461e-14	3.45451e-12	371	371
CEP97	0.377263	5.40201e-14	3.7404e-12	371	371
DDX3X	0.377257	5.40726e-14	3.7404e-12	371	371
ZFR	0.376899	5.73549e-14	3.92655e-12	371	371
RAP2B	0.376765	5.86327e-14	4.00028e-12	371	371
SRPK2	0.376144	6.49367e-14	4.41525e-12	371	371
CCNK	0.3756	7.09942e-14	4.7944e-12	371	371
ZNF107	0.375393	7.34539e-14	4.9271e-12	371	370
FAM199X	0.375209	7.56973e-14	5.06054e-12	371	371
UHRF1BP1	0.374993	7.84215e-14	5.22513e-12	371	371
SLMO2	0.374741	8.17157e-14	5.42647e-12	371	371
LSG1	0.3746	8.36183e-14	5.53436e-12	371	371
ZNF267	0.374409	8.62789e-14	5.69155e-12	371	371
WAC	0.374189	8.94236e-14	5.86293e-12	371	371
RPAP3	0.374186	8.94655e-14	5.86293e-12	371	371
BNIP3L	0.374011	9.2063e-14	6.01337e-12	371	371
COPB1	0.37394	9.31372e-14	6.06366e-12	371	371
MAPK1IP1L	0.373887	9.39421e-14	6.09614e-12	371	371
VPS26A	0.373399	1.01709e-13	6.55744e-12	371	371
C3orf38	0.372947	1.0946e-13	7.03437e-12	371	371
ME2	0.372693	1.14069e-13	7.30703e-12	371	371
RFX3	0.372575	1.16274e-13	7.42441e-12	371	368
GNPDA2	0.372109	1.25397e-13	7.98131e-12	371	371
RAB7A	0.371745	1.33013e-13	8.3857e-12	371	371
RQCD1	0.371584	1.36514e-13	8.5523e-12	371	369
DBF4	0.371255	1.43972e-13	8.96313e-12	371	371
KCTD9	0.37055	1.61324e-13	9.98104e-12	371	371
SF3B1	0.37024	1.69571e-13	1.04265e-11	371	371
IFT80	0.370206	1.705e-13	1.04376e-11	371	371
WDR82	0.370195	1.70799e-13	1.04376e-11	371	371
WDR3	0.369942	1.77891e-13	1.08309e-11	371	371
RBM25	0.369927	1.78322e-13	1.08309e-11	371	371
PGM2L1	0.369895	1.79247e-13	1.0854e-11	371	371
RPE	0.369838	1.80883e-13	1.09199e-11	371	371
ZNF160	0.369175	2.01201e-13	1.20298e-11	371	371
PRPF4B	0.36916	2.01685e-13	1.20298e-11	371	371
OSBPL8	0.36864	2.19223e-13	1.30283e-11	371	371
PHF6	0.368611	2.20236e-13	1.30283e-11	371	371
STXBP5	0.368556	2.22162e-13	1.30944e-11	371	371
MAP3K1	0.368324	2.30574e-13	1.35501e-11	371	371
POC1B	0.368222	2.34357e-13	1.37319e-11	371	371
RLIM	0.36816	2.36708e-13	1.3829e-11	371	371
ZNF800	0.368093	2.39258e-13	1.39372e-11	371	371
ZNF100	0.367881	2.4749e-13	1.43746e-11	371	371
PTP4A2	0.367838	2.49206e-13	1.44322e-11	371	371
NMD3	0.367723	2.53814e-13	1.46564e-11	371	371
OXSR1	0.367421	2.6633e-13	1.52906e-11	371	371
IQGAP1	0.367185	2.7652e-13	1.583e-11	371	371
MSL2	0.367116	2.79564e-13	1.59584e-11	371	371
RNF38	0.366156	3.25647e-13	1.84305e-11	371	371
B3GALNT1	0.365556	3.58157e-13	2.00807e-11	371	370
SFRS2IP	0.365326	3.71412e-13	2.07262e-11	371	371
SEH1L	0.365255	3.7562e-13	2.09025e-11	371	371
TTF2	0.365073	3.86589e-13	2.13934e-11	371	371
WWTR1	0.364761	4.06092e-13	2.24104e-11	371	371
IPO7	0.364695	4.10383e-13	2.25847e-11	371	371
GNL3L	0.364446	4.268e-13	2.32951e-11	371	371
TSC22D2	0.364314	4.35767e-13	2.37195e-11	371	371
SPTY2D1	0.364215	4.42638e-13	2.40279e-11	371	371
PIK3CB	0.363961	4.60724e-13	2.49123e-11	371	371
SENP5	0.363951	4.61431e-13	2.49123e-11	371	371
PPIG	0.363433	5.00623e-13	2.69552e-11	371	371
NUP107	0.363167	5.22009e-13	2.80309e-11	371	371
KIAA1524	0.362827	5.50592e-13	2.93328e-11	371	371
PDCD6IP	0.362826	5.50672e-13	2.93328e-11	371	371
WDFY1	0.362647	5.66317e-13	3.00858e-11	371	371
PUS7	0.362567	5.73499e-13	3.03436e-11	371	371
CALU	0.362547	5.75304e-13	3.03436e-11	371	371
ZNF85	0.362542	5.7574e-13	3.03436e-11	371	369
TMPPE	0.362248	6.02875e-13	3.16899e-11	371	371
PRPF38B	0.362167	6.10513e-13	3.20069e-11	371	371
USP46	0.361336	6.95242e-13	3.61635e-11	371	371
BICD2	0.361305	6.9863e-13	3.62451e-11	371	371
MASTL	0.361106	7.20637e-13	3.72897e-11	371	371
KIAA1468	0.360664	7.71923e-13	3.97371e-11	371	371
FMN1	0.360553	7.85449e-13	4.03292e-11	371	267
PNO1	0.359911	8.67806e-13	4.39909e-11	371	371
ZIK1	0.359856	8.75324e-13	4.42594e-11	371	371
GCC2	0.359612	9.0901e-13	4.58463e-11	371	371
CDV3	0.359585	9.12846e-13	4.59235e-11	371	371
CBL	0.359354	9.46082e-13	4.72377e-11	371	371
RAD18	0.359324	9.50533e-13	4.73413e-11	371	371
TRIM33	0.359288	9.55779e-13	4.74838e-11	371	371
IQCB1	0.359078	9.87425e-13	4.88379e-11	371	371
RAB8B	0.359075	9.87937e-13	4.88379e-11	371	371
ESCO1	0.358831	1.02593e-12	5.05907e-11	371	371
DICER1	0.358599	1.06331e-12	5.23045e-11	371	371
ZC3H15	0.358109	1.14698e-12	5.61429e-11	371	371
NCBP1	0.357984	1.16922e-12	5.70914e-11	371	371
SMC2	0.35777	1.20848e-12	5.85776e-11	371	371
MIB1	0.357623	1.23618e-12	5.97595e-11	371	371
ZNF654	0.357321	1.29507e-12	6.21696e-11	371	371
TWSG1	0.357176	1.32408e-12	6.32575e-11	371	371
HDAC2	0.356979	1.36491e-12	6.45538e-11	371	371
HSPA13	0.356967	1.3674e-12	6.45538e-11	371	371
SASS6	0.356967	1.36742e-12	6.45538e-11	371	371
RBBP8	0.356556	1.45642e-12	6.84311e-11	371	371
GAPVD1	0.356217	1.53422e-12	7.19171e-11	371	371
ALS2CR4	0.356136	1.55345e-12	7.24972e-11	371	371
RBM16	0.356001	1.58585e-12	7.38162e-11	371	371
IPMK	0.355772	1.64226e-12	7.60862e-11	371	358
ARL5B	0.355565	1.69508e-12	7.817e-11	371	371
SUV39H2	0.355401	1.73812e-12	7.99695e-11	371	371
GALNT4	0.355126	1.81276e-12	8.24517e-11	371	371
ADD3	0.354898	1.87711e-12	8.49905e-11	371	371
FAM60A	0.354792	1.90745e-12	8.61684e-11	371	371
ARMCX1	0.354551	1.97886e-12	8.84784e-11	371	371
SLC39A6	0.354534	1.9842e-12	8.84784e-11	371	371
METTL6	0.354444	2.01152e-12	8.93278e-11	371	371
ROCK1	0.354376	2.03243e-12	8.98387e-11	371	371
YWHAQ	0.354144	2.10548e-12	9.23908e-11	371	371
GNAI3	0.353996	2.15322e-12	9.4278e-11	371	371
KIAA0947	0.353846	2.20288e-12	9.58207e-11	371	371
NCEH1	0.353588	2.29105e-12	9.92382e-11	371	371
SCYL2	0.353469	2.333e-12	1.00602e-10	371	371
PDCL	0.353337	2.38011e-12	1.02412e-10	371	371
GPD2	0.353097	2.46807e-12	1.05968e-10	371	371
STRN	0.353064	2.48051e-12	1.06273e-10	371	371
BZW1	0.352907	2.54042e-12	1.08373e-10	371	371
EXOC6B	0.352878	2.55168e-12	1.08621e-10	371	369
SFRS13A	0.352743	2.60412e-12	1.10382e-10	371	371
HAUS3	0.352517	2.69481e-12	1.13482e-10	371	371
C11orf58	0.352504	2.70006e-12	1.13482e-10	371	371
C10orf118	0.352345	2.76587e-12	1.16003e-10	371	371
RNF145	0.35167	3.0624e-12	1.27634e-10	371	371
UBE2N	0.351646	3.07359e-12	1.27833e-10	371	371
ZNF675	0.351586	3.10178e-12	1.28571e-10	371	371
NUP98	0.351491	3.14625e-12	1.29771e-10	371	371
ANKIB1	0.351301	3.23778e-12	1.33271e-10	371	371
VPS37A	0.351247	3.26421e-12	1.34082e-10	371	371
ATRX	0.350932	3.42274e-12	1.39729e-10	371	371
TMEM39A	0.350776	3.50367e-12	1.4274e-10	371	371
ASAP1	0.350749	3.51801e-12	1.43032e-10	371	371
CEP135	0.350713	3.53734e-12	1.4347e-10	371	371
ZNF813	0.350688	3.55038e-12	1.4347e-10	371	359
ZNF430	0.350536	3.63239e-12	1.46487e-10	371	359
CRLF3	0.350493	3.65612e-12	1.47146e-10	371	371
SPIN1	0.350397	3.70922e-12	1.48697e-10	371	371
PIK3C2A	0.35037	3.72405e-12	1.48977e-10	371	371
YWHAG	0.350254	3.78965e-12	1.51297e-10	371	371
IARS	0.35006	3.90175e-12	1.5464e-10	371	371
C10orf119	0.349731	4.0985e-12	1.61684e-10	371	371
SNX6	0.349553	4.20967e-12	1.65741e-10	371	371
WNK1	0.349218	4.42573e-12	1.73562e-10	371	371
B4GALT4	0.34915	4.47104e-12	1.74994e-10	371	371
SRPK1	0.349071	4.52378e-12	1.76711e-10	371	371
CCT6A	0.348979	4.58657e-12	1.78813e-10	371	371
UTRN	0.348907	4.63621e-12	1.80396e-10	371	371
RSF1	0.348796	4.71406e-12	1.82711e-10	371	371
BRAF	0.348622	4.83798e-12	1.8715e-10	371	371
GFM1	0.34854	4.89712e-12	1.8907e-10	371	371
SYNCRIP	0.348453	4.96117e-12	1.90804e-10	371	371
ZMYM4	0.348423	4.98382e-12	1.91306e-10	371	371
DCBLD2	0.348344	5.04263e-12	1.92888e-10	371	371
ZNF207	0.348229	5.12967e-12	1.95773e-10	371	371
UTP20	0.348146	5.19317e-12	1.97256e-10	371	371
PATL1	0.34814	5.19823e-12	1.97256e-10	371	371
CPSF6	0.348106	5.2249e-12	1.97891e-10	371	371
CAMSAP1L1	0.347977	5.32562e-12	2.00561e-10	371	371
PPP2R3A	0.347918	5.37316e-12	2.01836e-10	371	371
STK4	0.347909	5.37972e-12	2.01836e-10	371	371
C7orf60	0.347831	5.44264e-12	2.03813e-10	371	371
ZNF280C	0.347255	5.92959e-12	2.21216e-10	371	370
DHX9	0.347072	6.09233e-12	2.26439e-10	371	371
FAM135A	0.346902	6.24796e-12	2.31791e-10	371	371
FOXJ3	0.346682	6.45541e-12	2.39042e-10	371	371
THOC2	0.346638	6.49735e-12	2.40003e-10	371	371
NIPBL	0.346589	6.54491e-12	2.41012e-10	371	371
FIP1L1	0.346334	6.79697e-12	2.49372e-10	371	371
PPP1R2P3	0.3462	6.93295e-12	2.53406e-10	371	369
HLTF	0.346188	6.94507e-12	2.53406e-10	371	371
RASA2	0.346022	7.11805e-12	2.59243e-10	371	365
DENND5A	0.346003	7.13724e-12	2.59467e-10	371	371
ABI1	0.345954	7.18969e-12	2.59896e-10	371	371
ITGB1	0.345953	7.19098e-12	2.59896e-10	371	371
PUS7L	0.345943	7.20122e-12	2.59896e-10	371	371
MTF2	0.345746	7.41407e-12	2.67094e-10	371	371
ZNF146	0.345433	7.7646e-12	2.78714e-10	371	371
BCAT1	0.345398	7.8047e-12	2.79381e-10	371	371
NPAT	0.345095	8.16156e-12	2.8983e-10	371	371
MED14	0.345014	8.25859e-12	2.92754e-10	371	371
DCAF16	0.344808	8.51322e-12	3.00178e-10	371	371
FUBP1	0.344761	8.57203e-12	3.01717e-10	371	371
CCDC6	0.344587	8.79512e-12	3.09023e-10	371	371
GTF2H1	0.344255	9.23431e-12	3.22182e-10	371	371
QKI	0.34422	9.28205e-12	3.22717e-10	371	371
CDC27	0.343833	9.82493e-12	3.40997e-10	371	371
SUSD1	0.343784	9.89586e-12	3.42861e-10	371	371
ADO	0.343644	1.01008e-11	3.48749e-10	371	371
RNF41	0.343579	1.01967e-11	3.5145e-10	371	371
NUP153	0.343523	1.02814e-11	3.53758e-10	371	371
RP2	0.343467	1.03666e-11	3.55462e-10	371	371
EIF2AK2	0.34345	1.03919e-11	3.55719e-10	371	371
IKBIP	0.343161	1.08404e-11	3.69798e-10	371	371
ATXN7	0.343108	1.09254e-11	3.7206e-10	371	371
TMEM65	0.342977	1.11374e-11	3.78632e-10	371	371
TTC26	0.342907	1.12511e-11	3.81846e-10	371	369
TAF4B	0.342659	1.16661e-11	3.95259e-10	371	363
ZDBF2	0.34246	1.20106e-11	4.047e-10	371	368
ZNF426	0.342451	1.2026e-11	4.047e-10	371	366
TWISTNB	0.342415	1.20898e-11	4.0616e-10	371	371
PRIM2	0.342225	1.24302e-11	4.16894e-10	371	371
BCLAF1	0.342187	1.24988e-11	4.1849e-10	371	371
BCL10	0.341913	1.30078e-11	4.34801e-10	371	371
ZNF525	0.341776	1.32693e-11	4.42059e-10	371	370
STK17B	0.341742	1.3335e-11	4.43437e-10	371	371
GSK3B	0.341732	1.33552e-11	4.43437e-10	371	371
RCOR1	0.341681	1.3455e-11	4.45266e-10	371	371
C12orf23	0.341451	1.39128e-11	4.59653e-10	371	371
CBX3	0.341404	1.40078e-11	4.61263e-10	371	371
CSNK1G1	0.340984	1.48892e-11	4.86266e-10	371	371
SUZ12	0.340953	1.49555e-11	4.87631e-10	371	371
NARS	0.340807	1.52778e-11	4.97327e-10	371	371
ATP7A	0.340785	1.53251e-11	4.98054e-10	371	371
RBM27	0.340371	1.62727e-11	5.27129e-10	371	371
ACVR1	0.340189	1.67086e-11	5.4037e-10	371	371
ARID2	0.340117	1.6884e-11	5.45159e-10	371	371
CNOT2	0.339952	1.72905e-11	5.56481e-10	371	371
USP1	0.339425	1.86604e-11	5.98635e-10	371	371
ZNF567	0.339296	1.90115e-11	6.07941e-10	371	370
PPIL4	0.339209	1.9249e-11	6.14549e-10	371	371
SMARCC1	0.338939	2.00139e-11	6.35601e-10	371	371
ZNF649	0.338936	2.00237e-11	6.35601e-10	371	370
TRDMT1	0.338806	2.04017e-11	6.45149e-10	371	371
DYNC1I2	0.338729	2.06285e-11	6.51287e-10	371	371
DYRK2	0.338495	2.13355e-11	6.7254e-10	371	371
CSDAP1	0.338283	2.19963e-11	6.91183e-10	371	357
EXOC2	0.338161	2.23853e-11	7.01387e-10	371	371
TEX10	0.338159	2.23914e-11	7.01387e-10	371	371
SMAD5	0.338084	2.26348e-11	7.06787e-10	371	371
BCOR	0.33805	2.27468e-11	7.09175e-10	371	371
EPC2	0.337902	2.32345e-11	7.22118e-10	371	371
PDE12	0.337707	2.38939e-11	7.40302e-10	371	371
TCF12	0.337664	2.40426e-11	7.43201e-10	371	371
FKTN	0.337658	2.40621e-11	7.43201e-10	371	371
RLF	0.337619	2.41962e-11	7.45622e-10	371	371
ZNF273	0.337582	2.43265e-11	7.47891e-10	371	371
OSBPL11	0.337353	2.51383e-11	7.71658e-10	371	371
RAB18	0.337264	2.54624e-11	7.80402e-10	371	371
MTMR9	0.337202	2.56869e-11	7.86073e-10	371	371
MTPAP	0.337188	2.57408e-11	7.86517e-10	371	371
AP4E1	0.337148	2.58887e-11	7.89824e-10	371	371
ADAMTS9	0.337126	2.59679e-11	7.91028e-10	371	371
PNPT1	0.337104	2.60527e-11	7.92401e-10	371	371
RIOK1	0.337084	2.61259e-11	7.93414e-10	371	371
CWC22	0.337038	2.62987e-11	7.96354e-10	371	371
UBE2Q2	0.337037	2.63026e-11	7.96354e-10	371	371
SPOPL	0.337016	2.63824e-11	7.97557e-10	371	371
GOLT1B	0.336945	2.66521e-11	8.04489e-10	371	371
CSRNP2	0.336908	2.67911e-11	8.07462e-10	371	371
ZNF292	0.336825	2.71123e-11	8.14678e-10	371	371
C14orf118	0.336798	2.7217e-11	8.16592e-10	371	371
FGD6	0.336765	2.73477e-11	8.18048e-10	371	371
SSB	0.336649	2.78046e-11	8.3047e-10	371	371
BAZ2A	0.336621	2.79144e-11	8.32501e-10	371	371
BTBD7	0.336551	2.81958e-11	8.39636e-10	371	371
C10orf12	0.336487	2.84541e-11	8.46064e-10	371	371
HMBOX1	0.336199	2.96506e-11	8.77712e-10	371	371
ANKRD32	0.335953	3.07066e-11	9.07622e-10	371	371
CLDND1	0.335825	3.1273e-11	9.21629e-10	371	371
USP33	0.33579	3.14282e-11	9.24834e-10	371	371
DCAF12	0.335532	3.26068e-11	9.5388e-10	371	371
FBXO5	0.335411	3.31743e-11	9.67642e-10	371	371
C12orf11	0.335242	3.39811e-11	9.89725e-10	371	371
C3orf52	0.33482	3.60807e-11	1.04934e-09	371	330
RIT1	0.334646	3.69811e-11	1.0724e-09	371	371
ZBTB34	0.334636	3.7037e-11	1.07246e-09	371	371
GTF3C3	0.33454	3.75413e-11	1.08548e-09	371	371
C12orf41	0.334464	3.79506e-11	1.09573e-09	371	371
SLMAP	0.334362	3.85042e-11	1.1069e-09	371	371
SHOC2	0.334315	3.87611e-11	1.11108e-09	371	371
LEMD3	0.333985	4.06163e-11	1.16091e-09	371	371
CSNK2A1	0.33393	4.0934e-11	1.16832e-09	371	371
ARHGAP5	0.333806	4.16539e-11	1.18378e-09	371	371
ARF4	0.333724	4.21405e-11	1.1942e-09	371	371
PPAT	0.333703	4.22693e-11	1.19615e-09	371	371
C10orf46	0.333566	4.30931e-11	1.21773e-09	371	371
STK17A	0.333436	4.38916e-11	1.23854e-09	371	371
SOAT1	0.333347	4.44476e-11	1.25245e-09	371	371
CASP2	0.333271	4.49284e-11	1.26422e-09	371	371
PDP1	0.333208	4.53328e-11	1.2738e-09	371	371
NUP160	0.333093	4.60715e-11	1.2891e-09	371	371
RNF34	0.333042	4.6408e-11	1.29669e-09	371	371
PRKD3	0.332828	4.78303e-11	1.33083e-09	371	371
UHRF2	0.332809	4.79525e-11	1.33237e-09	371	371
SPTLC1	0.332587	4.94808e-11	1.36911e-09	371	371
PIGX	0.332491	5.0156e-11	1.38586e-09	371	371
USP15	0.332444	5.04838e-11	1.39299e-09	371	371
NAA15	0.332433	5.05656e-11	1.39332e-09	371	371
C13orf23	0.332359	5.10951e-11	1.40578e-09	371	371
RNMT	0.332344	5.12017e-11	1.40578e-09	371	371
ANKRD13C	0.33226	5.18084e-11	1.41971e-09	371	371
RSRC2	0.332156	5.25703e-11	1.43861e-09	371	371
DDX21	0.331872	5.47181e-11	1.49328e-09	371	371
PDS5A	0.331642	5.65074e-11	1.54e-09	371	371
ITSN2	0.331621	5.66745e-11	1.54204e-09	371	371
USP34	0.331614	5.67369e-11	1.54204e-09	371	371
GAS2L3	0.331597	5.68674e-11	1.54348e-09	371	349
ZSCAN12	0.331567	5.71095e-11	1.54794e-09	371	371
FAIM	0.331288	5.93925e-11	1.60328e-09	371	371
KCTD10	0.331272	5.95222e-11	1.6046e-09	371	371
GPR82	0.330737	6.41511e-11	1.72472e-09	371	309
CSGALNACT2	0.330687	6.46002e-11	1.73445e-09	371	371
STAM	0.330644	6.49924e-11	1.73903e-09	371	371
LOX	0.330641	6.50164e-11	1.73903e-09	371	371
ZNF410	0.330249	6.86814e-11	1.83169e-09	371	371
CAPZA1	0.330232	6.88457e-11	1.83253e-09	371	371
PNMA1	0.330215	6.90059e-11	1.83253e-09	371	371
ZNF532	0.330186	6.92922e-11	1.83569e-09	371	371
JAK2	0.330161	6.953e-11	1.83954e-09	371	371
CSNK1A1	0.330104	7.00828e-11	1.85171e-09	371	371
OGFRL1	0.330001	7.1101e-11	1.87612e-09	371	371
BMP2K	0.32988	7.23161e-11	1.90315e-09	371	371
ERO1L	0.329846	7.26583e-11	1.90963e-09	371	371
RYBP	0.329692	7.42307e-11	1.94327e-09	371	371
VANGL1	0.329654	7.46278e-11	1.9511e-09	371	371
GTPBP4	0.329469	7.65778e-11	1.99945e-09	371	371
ARL6	0.329423	7.70727e-11	2.00711e-09	371	370
HACE1	0.329398	7.73353e-11	2.01132e-09	371	370
PTPN11	0.329248	7.897e-11	2.05116e-09	371	371
GNAQ	0.328959	8.22122e-11	2.1243e-09	371	371
SCRN1	0.328906	8.28132e-11	2.13705e-09	371	371
TMEM165	0.32879	8.41609e-11	2.16342e-09	371	371
FRS2	0.328641	8.5924e-11	2.2059e-09	371	371
ARL6IP6	0.328556	8.69357e-11	2.229e-09	371	371
ZNF664	0.328445	8.82868e-11	2.26073e-09	371	371
ADAMTS5	0.32815	9.19807e-11	2.34327e-09	371	371
NHLRC2	0.32812	9.23677e-11	2.35013e-09	371	370
CBFB	0.328031	9.35072e-11	2.37608e-09	371	371
ATP2B1	0.32797	9.43e-11	2.39318e-09	371	371
PTPRE	0.327931	9.48179e-11	2.40326e-09	371	371
C5orf34	0.327915	9.50252e-11	2.40545e-09	371	371
TMEM168	0.327904	9.51612e-11	2.40584e-09	371	371
CNOT7	0.327711	9.77499e-11	2.46815e-09	371	371
DPP8	0.327605	9.91871e-11	2.50127e-09	371	371
TFAM	0.327562	9.9777e-11	2.51297e-09	371	371
XPO7	0.32752	1.00359e-10	2.52442e-09	371	371
ZBTB1	0.32741	1.01906e-10	2.56011e-09	371	371
WDHD1	0.327307	1.03355e-10	2.58349e-09	371	371
GSTCD	0.327231	1.04454e-10	2.60768e-09	371	371
TAF1A	0.327213	1.04709e-10	2.61079e-09	371	369
ZNF81	0.327203	1.04863e-10	2.61135e-09	371	370
RNF219	0.327148	1.0566e-10	2.62463e-09	371	371
DARS	0.327086	1.06564e-10	2.64381e-09	371	371
RASAL2	0.327022	1.07516e-10	2.6608e-09	371	371
SGK196	0.32691	1.09191e-10	2.6989e-09	371	346
LHFPL2	0.326788	1.11044e-10	2.73789e-09	371	371
PMAIP1	0.326638	1.13365e-10	2.77452e-09	371	365
DCLRE1B	0.326425	1.16727e-10	2.8498e-09	371	371
MAP3K2	0.326233	1.19863e-10	2.91565e-09	371	371
YY1	0.326213	1.20186e-10	2.91993e-09	371	371
NUP35	0.326118	1.2178e-10	2.95505e-09	371	371
KIAA0226	0.325923	1.25091e-10	3.02732e-09	371	371
ATXN2	0.325915	1.25225e-10	3.02732e-09	371	371
BMPR1A	0.325907	1.25366e-10	3.02732e-09	371	371
GPATCH2	0.325606	1.30659e-10	3.14751e-09	371	371
FKBP9L	0.325446	1.33558e-10	3.20572e-09	371	367
OPA1	0.325418	1.34074e-10	3.21423e-09	371	371
AKIRIN1	0.325335	1.35596e-10	3.24267e-09	371	371
TAF3	0.325327	1.35749e-10	3.24267e-09	371	371
WAPAL	0.325138	1.39315e-10	3.31592e-09	371	371
RAD1	0.325038	1.41242e-10	3.35378e-09	371	371
NUFIP2	0.324941	1.43132e-10	3.39057e-09	371	371
UBXN2A	0.324898	1.43982e-10	3.40667e-09	371	371
MAP3K7	0.32471	1.4774e-10	3.48316e-09	371	371
LRRC58	0.324557	1.50857e-10	3.55244e-09	371	371
C11orf82	0.324532	1.51371e-10	3.56034e-09	371	371
ATF1	0.324469	1.52678e-10	3.58263e-09	371	371
MED13L	0.324448	1.53121e-10	3.5875e-09	371	371
CHMP2B	0.324442	1.53246e-10	3.5875e-09	371	371
RC3H2	0.324317	1.55883e-10	3.64068e-09	371	371
C9orf30	0.324099	1.60595e-10	3.74195e-09	371	371
ZDHHC2	0.324047	1.61748e-10	3.76002e-09	371	371
RBM12B	0.324018	1.62387e-10	3.77049e-09	371	371
POLI	0.323849	1.66173e-10	3.8539e-09	371	371
BAT2L2	0.323797	1.67359e-10	3.87688e-09	371	371
SMEK2	0.323787	1.67598e-10	3.87792e-09	371	371
ZDHHC13	0.323724	1.69045e-10	3.90686e-09	371	371
GMFB	0.323616	1.71545e-10	3.95461e-09	371	371
KPNB1	0.323609	1.71707e-10	3.95461e-09	371	371
ZNF347	0.323517	1.73877e-10	3.99997e-09	371	366
NUP155	0.323304	1.79003e-10	4.10529e-09	371	371
DNAJB14	0.323301	1.79073e-10	4.10529e-09	371	371
WTAP	0.323121	1.83515e-10	4.19264e-09	371	371
AGTPBP1	0.323069	1.84806e-10	4.21248e-09	371	371
SLC30A6	0.322937	1.88158e-10	4.28399e-09	371	371
VPS54	0.322883	1.89556e-10	4.30107e-09	371	371
ZNF625	0.322793	1.91874e-10	4.34871e-09	371	344
CDC42SE2	0.322755	1.92881e-10	4.36656e-09	371	371
ZBTB38	0.322729	1.93565e-10	4.37707e-09	371	371
CSNK2A1P	0.322632	1.96134e-10	4.43013e-09	371	371
YME1L1	0.322602	1.96934e-10	4.43815e-09	371	371
FHOD3	0.322222	2.07334e-10	4.65673e-09	371	360
CCNL1	0.322152	2.09332e-10	4.68575e-09	371	371
RICTOR	0.322033	2.12733e-10	4.75652e-09	371	371
CHD1	0.321982	2.14196e-10	4.78387e-09	371	371
ZMYM2	0.321971	2.14529e-10	4.78593e-09	371	371
EYA3	0.321871	2.17463e-10	4.83592e-09	371	371
WDR35	0.321869	2.17497e-10	4.83592e-09	371	371
ZNF486	0.321824	2.18843e-10	4.85957e-09	371	330
LRRC34	0.321809	2.19293e-10	4.85957e-09	371	371
ZNHIT6	0.321721	2.21899e-10	4.91185e-09	371	371
LCORL	0.321532	2.27657e-10	5.03249e-09	371	371
TAOK1	0.321503	2.28546e-10	5.04218e-09	371	371
TOP1	0.321467	2.29681e-10	5.06161e-09	371	371
UPF2	0.321444	2.30401e-10	5.07188e-09	371	371
LIN9	0.321353	2.33235e-10	5.12859e-09	371	371
CP110	0.32124	2.3682e-10	5.20167e-09	371	371
LRCH3	0.320973	2.45527e-10	5.37467e-09	371	371
TPM4	0.320966	2.45775e-10	5.37467e-09	371	371
TANC1	0.320917	2.47376e-10	5.3951e-09	371	371
PLEKHA2	0.320914	2.47476e-10	5.3951e-09	371	371
OXCT1	0.320874	2.48842e-10	5.41204e-09	371	371
PPP2R2A	0.320833	2.50211e-10	5.43588e-09	371	371
GNPTAB	0.320745	2.53194e-10	5.48872e-09	371	371
SLC25A24	0.320639	2.56862e-10	5.55011e-09	371	371
GRINL1A	0.320609	2.57879e-10	5.56605e-09	371	371
ZNF195	0.320564	2.59454e-10	5.58793e-09	371	371
VPS8	0.320301	2.68827e-10	5.78356e-09	371	371
C3orf64	0.319978	2.80777e-10	6.02763e-09	371	371
SART3	0.319945	2.82025e-10	6.04791e-09	371	371
RHOQ	0.319894	2.8396e-10	6.08286e-09	371	371
APAF1	0.319799	2.87581e-10	6.1472e-09	371	371
DCUN1D1	0.319611	2.94947e-10	6.29114e-09	371	371
CDCP1	0.319464	3.00842e-10	6.40318e-09	371	370
KIDINS220	0.319323	3.0657e-10	6.51814e-09	371	371
BARD1	0.319232	3.10333e-10	6.5809e-09	371	347
STX7	0.319228	3.10513e-10	6.5809e-09	371	371
ZNF468	0.31914	3.14187e-10	6.65168e-09	371	371
SENP6	0.319101	3.15859e-10	6.67998e-09	371	371
DIRC2	0.319052	3.17947e-10	6.71292e-09	371	371
FAR2	0.319048	3.18091e-10	6.71292e-09	371	369
NRAS	0.318799	3.28887e-10	6.92611e-09	371	371
TRPC1	0.318732	3.31866e-10	6.97409e-09	371	370
ZNF124	0.31872	3.32385e-10	6.97763e-09	371	371
OSMR	0.318595	3.38019e-10	7.08806e-09	371	371
LRRC8B	0.318552	3.3997e-10	7.10691e-09	371	371
B3GNT5	0.318544	3.40341e-10	7.1072e-09	371	371
RAP1A	0.318524	3.41227e-10	7.11825e-09	371	371
ZNF528	0.318488	3.42884e-10	7.14533e-09	371	370
RNF169	0.31836	3.48815e-10	7.25014e-09	371	371
CDC73	0.318356	3.49005e-10	7.25014e-09	371	371
SDCCAG1	0.318247	3.54086e-10	7.34802e-09	371	371
ZNF322A	0.318172	3.57692e-10	7.39973e-09	371	371
RALGAPB	0.31808	3.62097e-10	7.48309e-09	371	371
ATP1B3	0.318044	3.63841e-10	7.50668e-09	371	371
FBXO34	0.318041	3.63992e-10	7.50668e-09	371	371
C9orf6	0.317963	3.67822e-10	7.56999e-09	371	371
ADPRH	0.317839	3.73947e-10	7.68018e-09	371	371
SEC23IP	0.317785	3.76653e-10	7.72778e-09	371	371
TCP11L2	0.317774	3.77198e-10	7.73101e-09	371	371
ARL8B	0.317719	3.79961e-10	7.77964e-09	371	371
STAG1	0.317636	3.84209e-10	7.85048e-09	371	371
MYST3	0.317621	3.84959e-10	7.85774e-09	371	371
OTUD6B	0.317604	3.85854e-10	7.86796e-09	371	371
INPP4A	0.317501	3.91168e-10	7.96001e-09	371	371
ZNF8	0.317428	3.9501e-10	8.02181e-09	371	371
CHSY1	0.317414	3.95722e-10	8.02807e-09	371	371
ZNF611	0.317404	3.96268e-10	8.03098e-09	371	369
MPHOSPH9	0.317048	4.15485e-10	8.40333e-09	371	371
C3orf34	0.317022	4.16936e-10	8.42414e-09	371	371
FANCM	0.317013	4.17426e-10	8.4255e-09	371	371
ZUFSP	0.316834	4.27527e-10	8.60323e-09	371	371
SNTB2	0.316776	4.30821e-10	8.66077e-09	371	371
ITGAV	0.316751	4.3227e-10	8.68113e-09	371	371
DEK	0.316709	4.34644e-10	8.72001e-09	371	371
FER	0.316188	4.6579e-10	9.29806e-09	371	371
SMC5	0.316171	4.66855e-10	9.30085e-09	371	371
SMARCA5	0.316128	4.69538e-10	9.33546e-09	371	371
PLEKHA3	0.315643	5.00674e-10	9.89526e-09	371	371
ZBTB6	0.315632	5.01399e-10	9.89978e-09	371	371
ZNF761	0.31556	5.06196e-10	9.97147e-09	371	371
SNAPC1	0.315552	5.06724e-10	9.97147e-09	371	371
MAK16	0.315519	5.08992e-10	1.00001e-08	371	371
PPPDE1	0.315443	5.14125e-10	1.0091e-08	371	371
PICALM	0.315407	5.16537e-10	1.01205e-08	371	371
STRBP	0.315406	5.16644e-10	1.01205e-08	371	371
KIAA0020	0.31525	5.27381e-10	1.03106e-08	371	371
KIAA2026	0.315194	5.31314e-10	1.03773e-08	371	371
CLSPN	0.315036	5.4251e-10	1.05752e-08	371	363
PAIP1	0.314993	5.45601e-10	1.06251e-08	371	371
ZNF134	0.314827	5.57739e-10	1.08403e-08	371	371
PAK1IP1	0.314701	5.67082e-10	1.10111e-08	371	371
POLR2B	0.314674	5.69055e-10	1.10387e-08	371	371
SGTB	0.314638	5.7176e-10	1.10688e-08	371	371
LOC641298	0.314632	5.72277e-10	1.10688e-08	371	341
TMTC2	0.314608	5.74022e-10	1.10918e-08	371	368
SLC37A3	0.314567	5.77164e-10	1.11417e-08	371	371
SUV420H1	0.314552	5.78334e-10	1.11535e-08	371	371
ADAM10	0.31443	5.8769e-10	1.1323e-08	371	371
ATF2	0.314398	5.90133e-10	1.13591e-08	371	371
WDR47	0.314301	5.97783e-10	1.14952e-08	371	371
C3orf21	0.314226	6.03709e-10	1.1598e-08	371	371
ARHGAP18	0.314174	6.0784e-10	1.16614e-08	371	371
C18orf54	0.31417	6.08183e-10	1.16614e-08	371	370
DIAPH2	0.314153	6.09546e-10	1.16763e-08	371	371
RAB6A	0.314107	6.1323e-10	1.17356e-08	371	371
NPHP3	0.314031	6.19395e-10	1.18422e-08	371	371
CEP55	0.314012	6.20934e-10	1.18603e-08	371	371
OLA1	0.313959	6.25303e-10	1.19197e-08	371	371
HIVEP2	0.313952	6.25842e-10	1.19197e-08	371	371
NRIP3	0.313853	6.34096e-10	1.20295e-08	371	358
ZBTB26	0.313839	6.35229e-10	1.20295e-08	371	371
ADNP	0.313736	6.43911e-10	1.21708e-08	371	371
DLG1	0.31344	6.69421e-10	1.25932e-08	371	371
MLL5	0.3134	6.72907e-10	1.26469e-08	371	371
YWHAZ	0.313217	6.89331e-10	1.29311e-08	371	371
RBM18	0.313036	7.05837e-10	1.32194e-08	371	371
BTG3	0.312846	7.23667e-10	1.35116e-08	371	371
NPC1	0.31279	7.28964e-10	1.35893e-08	371	371
CREB3L2	0.312788	7.29193e-10	1.35893e-08	371	371
ZFP91	0.31278	7.29911e-10	1.359e-08	371	371
FNBP4	0.312749	7.32864e-10	1.36322e-08	371	371
CCNT2	0.312742	7.33551e-10	1.36323e-08	371	371
CDC42SE1	0.312714	7.36235e-10	1.36657e-08	371	371
ATAD2B	0.312682	7.39321e-10	1.36884e-08	371	371
ODF2L	0.312602	7.47153e-10	1.3795e-08	371	371
HAUS2	0.312588	7.48509e-10	1.38072e-08	371	371
PHIP	0.312524	7.5486e-10	1.39115e-08	371	371
FAM13B	0.31229	7.78313e-10	1.43172e-08	371	371
CHML	0.312277	7.79604e-10	1.43277e-08	371	371
MAP4K5	0.312233	7.84101e-10	1.43971e-08	371	371
MED17	0.312221	7.8537e-10	1.44071e-08	371	371
KIF20B	0.312017	8.06515e-10	1.47814e-08	371	371
SRFBP1	0.311993	8.09029e-10	1.48138e-08	371	371
MAP4K3	0.3119	8.18957e-10	1.49819e-08	371	371
ADNP2	0.311849	8.24372e-10	1.50671e-08	371	371
ZBTB10	0.311701	8.40469e-10	1.53472e-08	371	371
LTBP1	0.311644	8.46764e-10	1.5448e-08	371	371
FAM102B	0.311614	8.50089e-10	1.54945e-08	371	371
CCDC91	0.311559	8.56171e-10	1.55768e-08	371	371
ZNF283	0.311405	8.73616e-10	1.58797e-08	371	370
PNMA2	0.311208	8.9632e-10	1.62571e-08	371	365
C18orf25	0.311203	8.96818e-10	1.62571e-08	371	371
CBLL1	0.311155	9.02482e-10	1.63448e-08	371	371
HIPK3	0.311043	9.15766e-10	1.65703e-08	371	371
XRCC2	0.310985	9.22666e-10	1.668e-08	371	367
SFPQ	0.310963	9.25269e-10	1.67119e-08	371	371
BIRC6	0.310885	9.3476e-10	1.6868e-08	371	371
CCDC138	0.310831	9.41288e-10	1.69704e-08	371	370
PBRM1	0.310794	9.45842e-10	1.70371e-08	371	371
C14orf43	0.310773	9.4842e-10	1.70681e-08	371	371
FAM63B	0.310639	9.65086e-10	1.73524e-08	371	371
ZBED5	0.310611	9.68609e-10	1.74e-08	371	371
WDR75	0.310544	9.77045e-10	1.75358e-08	371	371
RPGRIP1L	0.310269	1.0126e-09	1.81249e-08	371	371
MFSD1	0.310244	1.01591e-09	1.81678e-08	371	371
KLHL7	0.310138	1.02998e-09	1.84029e-08	371	371
DENR	0.309984	1.05078e-09	1.8741e-08	371	371
FAM49B	0.309908	1.06116e-09	1.89089e-08	371	371
PTPRG	0.309901	1.0621e-09	1.89089e-08	371	371
DDHD2	0.309882	1.06474e-09	1.8939e-08	371	371
SPRED1	0.309844	1.07002e-09	1.9016e-08	371	371
ZNF562	0.309779	1.07897e-09	1.91579e-08	371	371
RNF13	0.30955	1.11146e-09	1.96823e-08	371	371
ANAPC1	0.309414	1.13118e-09	2.00136e-08	371	371
PDE7A	0.309029	1.18893e-09	2.09609e-08	371	371
LOC100129550	0.308646	1.24919e-09	2.19649e-08	371	371
CLOCK	0.308567	1.26189e-09	2.21688e-08	371	371
COG5	0.308425	1.28524e-09	2.2559e-08	371	371
CHST11	0.308374	1.29371e-09	2.26878e-08	371	371
BMPR2	0.308203	1.32247e-09	2.31311e-08	371	371
RNF24	0.308028	1.35258e-09	2.36369e-08	371	371
KIN	0.307968	1.3631e-09	2.3779e-08	371	371
LOC284441	0.307937	1.36855e-09	2.38533e-08	371	367
CCDC112	0.307913	1.37283e-09	2.38938e-08	371	370
PIKFYVE	0.307691	1.41247e-09	2.45329e-08	371	371
C5orf51	0.307565	1.43565e-09	2.48704e-08	371	371
DDX18	0.307294	1.48642e-09	2.56661e-08	371	371
ZNF718	0.307276	1.48987e-09	2.56981e-08	371	370
FAM98B	0.307224	1.49988e-09	2.58259e-08	371	371
KBTBD2	0.307168	1.51064e-09	2.59888e-08	371	371
TTLL5	0.30713	1.51807e-09	2.6094e-08	371	371
ZNF738	0.306959	1.55166e-09	2.66484e-08	371	371
ANLN	0.306945	1.55442e-09	2.66728e-08	371	371
TMED8	0.306901	1.56327e-09	2.68016e-08	371	371
SLC26A2	0.306882	1.567e-09	2.68424e-08	371	371
CRY1	0.30684	1.57561e-09	2.69667e-08	371	371
FNBP1L	0.306792	1.58528e-09	2.71089e-08	371	371
TNFSF15	0.306518	1.64179e-09	2.79793e-08	371	285
UBAP2	0.306507	1.64419e-09	2.79887e-08	371	371
CCT2	0.306502	1.64515e-09	2.79887e-08	371	371
SCIN	0.306369	1.67329e-09	2.84265e-08	371	341
C6orf204	0.306367	1.67374e-09	2.84265e-08	371	359
DUSP11	0.306013	1.75132e-09	2.96682e-08	371	371
TPBG	0.305966	1.76188e-09	2.98217e-08	371	368
RFK	0.305847	1.78879e-09	3.02515e-08	371	371
ABI2	0.305829	1.79288e-09	3.0295e-08	371	371
SP4	0.30579	1.80184e-09	3.03947e-08	371	371
EXOC1	0.305614	1.84279e-09	3.10331e-08	371	371
DSG2	0.305418	1.8893e-09	3.17357e-08	371	371
RNF168	0.305412	1.89074e-09	3.17357e-08	371	371
JRKL	0.305406	1.89218e-09	3.17357e-08	371	371
GCA	0.305395	1.89487e-09	3.1749e-08	371	371
ZNF260	0.305292	1.91997e-09	3.21155e-08	371	371
ARCN1	0.305165	1.95114e-09	3.25822e-08	371	371
BAG5	0.305157	1.9531e-09	3.25876e-08	371	371
SNAPC3	0.304952	2.00476e-09	3.34216e-08	371	371
NCL	0.304883	2.02253e-09	3.36897e-08	371	371
ITGA2	0.304862	2.02794e-09	3.37515e-08	371	370
C6orf167	0.304641	2.0856e-09	3.46012e-08	371	371
PLEKHB2	0.30464	2.08594e-09	3.46012e-08	371	371
C11orf30	0.30456	2.1073e-09	3.48975e-08	371	371
CGGBP1	0.304552	2.10929e-09	3.49014e-08	371	371
EIF5A2	0.304541	2.11221e-09	3.49207e-08	371	371
KIAA1804	0.304494	2.12486e-09	3.50717e-08	371	370
GPR160	0.304431	2.14205e-09	3.53252e-08	371	371
CRYBG3	0.304424	2.14377e-09	3.53252e-08	371	366
NFE2L3	0.30441	2.14759e-09	3.53588e-08	371	371
PDE3A	0.304345	2.16542e-09	3.55936e-08	371	353
TNFRSF21	0.304316	2.17356e-09	3.56743e-08	371	371
URB2	0.304314	2.17392e-09	3.56743e-08	371	371
ARID5B	0.303954	2.27542e-09	3.72778e-08	371	371
RPRD1A	0.303948	2.27723e-09	3.72778e-08	371	371
ZNF143	0.303835	2.31013e-09	3.7761e-08	371	371
STAG2	0.303834	2.31055e-09	3.7761e-08	371	371
ZNF432	0.303776	2.32755e-09	3.80077e-08	371	369
KLHDC5	0.303764	2.33086e-09	3.80306e-08	371	371
PTPN2	0.303721	2.34358e-09	3.82068e-08	371	371
ADAMTS12	0.303613	2.37592e-09	3.87025e-08	371	358
DPY19L3	0.303464	2.4212e-09	3.93757e-08	371	371
ALMS1	0.30332	2.46562e-09	4.00654e-08	371	371
CAP1	0.303178	2.51036e-09	4.07259e-08	371	371
TXLNG	0.303134	2.52439e-09	4.0887e-08	371	371
SERPINB9	0.30312	2.52869e-09	4.09232e-08	371	371
UBLCP1	0.303097	2.53621e-09	4.10117e-08	371	371
KDELC2	0.303036	2.55555e-09	4.12145e-08	371	371
ZNF284	0.303032	2.55693e-09	4.12145e-08	371	362
SNX4	0.303032	2.55703e-09	4.12145e-08	371	371
DYNC1H1	0.30302	2.561e-09	4.12451e-08	371	371
SFRS1	0.302992	2.56991e-09	4.13552e-08	371	371
PFKFB3	0.302904	2.59856e-09	4.17825e-08	371	371
TET3	0.30275	2.64969e-09	4.25703e-08	371	371
TBK1	0.302702	2.66562e-09	4.27917e-08	371	371
PUM2	0.302598	2.70074e-09	4.32858e-08	371	371
RUFY2	0.302369	2.77985e-09	4.45178e-08	371	371
2019-03-01	0.302362	2.78239e-09	4.45228e-08	371	367
ZNF354C	0.302356	2.78467e-09	4.45234e-08	371	312
BRAP	0.302306	2.80196e-09	4.47639e-08	371	371
KLHL18	0.302251	2.82165e-09	4.50063e-08	371	371
C9orf21	0.302231	2.82873e-09	4.50832e-08	371	371
SLC30A7	0.302204	2.83815e-09	4.51971e-08	371	371
PIGN	0.302142	2.86063e-09	4.55188e-08	371	371
TP53BP1	0.302126	2.86633e-09	4.55731e-08	371	371
ARID1B	0.302117	2.8696e-09	4.55887e-08	371	371
PRKAA1	0.302019	2.90508e-09	4.61156e-08	371	371
EIF2A	0.301659	3.03951e-09	4.81263e-08	371	371
ZNF28	0.301629	3.05099e-09	4.82395e-08	371	369
ZNF614	0.301512	3.0963e-09	4.89172e-08	371	371
CCDC75	0.30137	3.15204e-09	4.97583e-08	371	370
STRAP	0.30135	3.15996e-09	4.98439e-08	371	371
TRAF3IP1	0.301135	3.24601e-09	5.10798e-08	371	371
ZNF816A	0.301041	3.28478e-09	5.15677e-08	371	369
IRAK3	0.300976	3.31154e-09	5.19468e-08	371	371
ZNF737	0.300909	3.33935e-09	5.23419e-08	371	370
USP3	0.300823	3.3754e-09	5.27409e-08	371	371
RBM26	0.300774	3.39615e-09	5.29405e-08	371	371
ANKRD12	0.300759	3.40257e-09	5.29992e-08	371	371
DVL3	0.300646	3.45101e-09	5.35861e-08	371	371
RPL23AP53	0.300518	3.50697e-09	5.43703e-08	371	371
HSPH1	0.300449	3.53733e-09	5.47731e-08	371	371
AGPS	0.300387	3.5646e-09	5.50922e-08	371	371
UBE2H	0.300334	3.58848e-09	5.54183e-08	371	371
LIMA1	0.300289	3.60866e-09	5.56868e-08	371	371
RNF2	0.300231	3.63509e-09	5.60512e-08	371	371
TBC1D23	0.300153	3.67045e-09	5.65091e-08	371	371
PPM1L	0.300125	3.6833e-09	5.66194e-08	371	371
SGOL2	0.300055	3.7156e-09	5.70718e-08	371	371
GIGYF2	0.299931	3.77344e-09	5.79122e-08	371	371
KPNA2	0.299926	3.77613e-09	5.79122e-08	371	371
CEP63	0.299884	3.79576e-09	5.81685e-08	371	371
HIAT1	0.299875	3.80033e-09	5.81939e-08	371	371
PLBD1	0.299746	3.86154e-09	5.89499e-08	371	371
CPSF2	0.299684	3.89173e-09	5.93652e-08	371	371
NCOA1	0.299491	3.98636e-09	6.07158e-08	371	371
CDK2	0.299119	4.17531e-09	6.33033e-08	371	371
HSF2	0.299086	4.19248e-09	6.35153e-08	371	371
C12orf48	0.298953	4.26265e-09	6.45292e-08	371	371
EPB41L2	0.298944	4.2672e-09	6.45491e-08	371	371
KIAA1731	0.298922	4.27915e-09	6.46736e-08	371	371
TNFAIP6	0.298906	4.28758e-09	6.471e-08	371	311
ZNF382	0.298861	4.31164e-09	6.50239e-08	371	366
CUL4B	0.2988	4.34425e-09	6.54299e-08	371	371
SLFN11	0.29869	4.40421e-09	6.62694e-08	371	371
CYB5R4	0.298664	4.4184e-09	6.63826e-08	371	371
RNASEN	0.298602	4.45227e-09	6.68411e-08	371	371
TBCEL	0.298578	4.46552e-09	6.69895e-08	371	371
GIT2	0.298476	4.52275e-09	6.7797e-08	371	371
HECTD2	0.298428	4.54977e-09	6.81507e-08	371	371
DDHD1	0.298419	4.55489e-09	6.81762e-08	371	371
KPNA1	0.298305	4.61979e-09	6.89921e-08	371	371
NUPL1	0.298266	4.64198e-09	6.92716e-08	371	371
GLS	0.298216	4.671e-09	6.96003e-08	371	371
C6orf150	0.298001	4.79682e-09	7.13684e-08	371	362
RRAGC	0.297955	4.82404e-09	7.17198e-08	371	370
GNB4	0.297937	4.83483e-09	7.18266e-08	371	371
BRCA2	0.297743	4.95281e-09	7.34698e-08	371	368
ZNF431	0.297635	5.01942e-09	7.42919e-08	371	371
PIGA	0.297423	5.15218e-09	7.61437e-08	371	371
ARPP19	0.297379	5.18082e-09	7.65103e-08	371	371
MYLIP	0.297345	5.20246e-09	7.6716e-08	371	371
VEZF1	0.297256	5.26008e-09	7.74511e-08	371	371
ZNF354A	0.296998	5.42977e-09	7.98317e-08	371	371
FAM164A	0.296557	5.73371e-09	8.41141e-08	371	371
USP24	0.296542	5.74422e-09	8.41954e-08	371	371
GPRIN3	0.296488	5.7825e-09	8.45807e-08	371	371
GPR161	0.296149	6.02877e-09	8.79892e-08	371	371
EIF2C3	0.296116	6.05317e-09	8.82805e-08	371	371
PTPDC1	0.296095	6.06894e-09	8.84458e-08	371	371
AZI2	0.295986	6.15051e-09	8.94384e-08	371	371
MANSC1	0.295876	6.23458e-09	9.05946e-08	371	371
ZDHHC20	0.295815	6.28117e-09	9.12052e-08	371	364
HNRNPA2B1	0.295781	6.30773e-09	9.15241e-08	371	371
CEP110	0.295561	6.47993e-09	9.38859e-08	371	371
QPCT	0.295553	6.48694e-09	9.39191e-08	371	371
MARK3	0.295525	6.50912e-09	9.41693e-08	371	371
ZNF714	0.295519	6.51367e-09	9.41693e-08	371	371
CXCL5	0.295429	6.58617e-09	9.50169e-08	371	297
TRAK2	0.295428	6.58661e-09	9.50169e-08	371	371
TNKS2	0.295354	6.64663e-09	9.58135e-08	371	371
ZSWIM6	0.295274	6.71245e-09	9.65527e-08	371	371
PARG	0.295206	6.76849e-09	9.72884e-08	371	371
FUT11	0.294944	6.98938e-09	1.00218e-07	371	371
HNRNPUL1	0.294927	7.00401e-09	1.00311e-07	371	371
SPATS2	0.294921	7.00899e-09	1.00311e-07	371	371
ATP6V1A	0.294885	7.03969e-09	1.00606e-07	371	371
CSDA	0.294762	7.14669e-09	1.02062e-07	371	371
FKBP9	0.294746	7.16044e-09	1.02185e-07	371	371
LOC641367	0.294682	7.21696e-09	1.02918e-07	371	338
RASSF8	0.294622	7.27017e-09	1.03602e-07	371	371
VTA1	0.294597	7.29229e-09	1.03843e-07	371	371
UPF3B	0.294591	7.2976e-09	1.03845e-07	371	371
ZNF697	0.294477	7.40003e-09	1.05077e-07	371	371
TBCCD1	0.294374	7.49343e-09	1.06252e-07	371	371
C14orf174	0.294313	7.54992e-09	1.06977e-07	371	316
ZNF587	0.294302	7.55982e-09	1.07041e-07	371	371
ZNF141	0.294223	7.63373e-09	1.08011e-07	371	370
FAR1	0.294153	7.69859e-09	1.08774e-07	371	371
PURB	0.294097	7.75197e-09	1.09416e-07	371	371
TMEFF1	0.294093	7.75504e-09	1.09416e-07	371	371
NCAPD3	0.293972	7.87026e-09	1.10885e-07	371	371
BTF3L4	0.293937	7.90437e-09	1.11208e-07	371	371
STXBP3	0.293863	7.97573e-09	1.12133e-07	371	371
ATP2A2	0.293813	8.02426e-09	1.12736e-07	371	371
FKBP14	0.293768	8.06886e-09	1.13203e-07	371	371
MBD2	0.293645	8.19027e-09	1.14744e-07	371	371
EIF2AK3	0.293632	8.2041e-09	1.14857e-07	371	371
TRMT6	0.293578	8.25808e-09	1.15532e-07	371	371
MCM8	0.293563	8.27283e-09	1.15638e-07	371	371
MECOM	0.293555	8.2807e-09	1.15638e-07	371	371
GEMIN5	0.293553	8.28306e-09	1.15638e-07	371	371
EDIL3	0.293498	8.33809e-09	1.16325e-07	371	337
ZNF180	0.293461	8.37661e-09	1.1678e-07	371	371
ZNF239	0.293291	8.55089e-09	1.19127e-07	371	363
NFAT5	0.293186	8.66147e-09	1.20498e-07	371	371
GFPT1	0.292994	8.86564e-09	1.23253e-07	371	371
KIAA1033	0.292979	8.88235e-09	1.23399e-07	371	371
ANKRD26	0.292825	9.04935e-09	1.25631e-07	371	371
CXorf23	0.292791	9.08707e-09	1.26067e-07	371	371
ZNF14	0.292742	9.14077e-09	1.26636e-07	371	369
CUL3	0.292696	9.19243e-09	1.27263e-07	371	371
AQR	0.292601	9.29932e-09	1.28564e-07	371	371
LPAR1	0.292521	9.38976e-09	1.29545e-07	371	356
LRRIQ1	0.292426	9.49869e-09	1.30957e-07	371	131
BRPF1	0.29235	9.58582e-09	1.31793e-07	371	371
SMURF2	0.292339	9.59956e-09	1.31891e-07	371	371
USP39	0.292327	9.61339e-09	1.3199e-07	371	371
HEATR1	0.292199	9.76287e-09	1.33858e-07	371	371
RNF111	0.29217	9.79748e-09	1.3424e-07	371	371
ZFP30	0.292111	9.86777e-09	1.35018e-07	371	369
KHDRBS1	0.292095	9.88658e-09	1.35182e-07	371	371
MDM1	0.29202	9.97683e-09	1.36323e-07	371	371
ZWILCH	0.291961	1.0049e-08	1.37121e-07	371	371
DENND4C	0.29192	1.00992e-08	1.37711e-07	371	371
DEGS1	0.291914	1.01064e-08	1.37716e-07	371	371
NOP58	0.291896	1.01274e-08	1.37907e-07	371	371
KIRREL	0.291754	1.0303e-08	1.40012e-07	371	344
SMS	0.291647	1.04378e-08	1.41746e-07	371	371
HEG1	0.291599	1.04978e-08	1.42366e-07	371	371
C14orf135	0.291348	1.08214e-08	1.46456e-07	371	371
ZNF529	0.291297	1.08877e-08	1.47254e-07	371	371
ORC2L	0.291213	1.09988e-08	1.48655e-07	371	371
TIPARP	0.291181	1.10413e-08	1.49128e-07	371	371
C1orf96	0.291161	1.10689e-08	1.494e-07	371	371
TMX3	0.291046	1.12236e-08	1.51283e-07	371	371
BAG4	0.291017	1.12625e-08	1.51705e-07	371	371
GTF2H3	0.290997	1.12888e-08	1.51956e-07	371	371
RALA	0.290986	1.13049e-08	1.5207e-07	371	371
ZNF701	0.290957	1.13446e-08	1.52502e-07	371	368
KIF3A	0.290906	1.14144e-08	1.53336e-07	371	371
ZC3HAV1L	0.29089	1.14357e-08	1.53416e-07	371	311
HMGXB4	0.290882	1.14469e-08	1.53462e-07	371	371
ACBD3	0.290804	1.15552e-08	1.5481e-07	371	371
FAM171B	0.290736	1.16501e-08	1.55977e-07	371	370
GZF1	0.29063	1.18003e-08	1.57881e-07	371	371
PRR11	0.290473	1.20245e-08	1.60558e-07	371	344
TMTC3	0.290411	1.2115e-08	1.6155e-07	371	371
SNRNP27	0.290346	1.22103e-08	1.62712e-07	371	371
UBP1	0.290291	1.22913e-08	1.63682e-07	371	371
LOC727896	0.290241	1.23646e-08	1.64548e-07	371	370
TNKS	0.290141	1.25148e-08	1.66324e-07	371	371
MAGEE1	0.290102	1.25733e-08	1.6699e-07	371	369
KDM6A	0.290058	1.26398e-08	1.67761e-07	371	371
ELF1	0.289969	1.27761e-08	1.69458e-07	371	371
DYRK1A	0.289896	1.28886e-08	1.70836e-07	371	371
KIF18A	0.289807	1.30273e-08	1.72445e-07	371	371
BRWD3	0.289779	1.30706e-08	1.72904e-07	371	370
ZNF550	0.289718	1.31658e-08	1.74047e-07	371	371
HIVEP1	0.289562	1.34155e-08	1.7723e-07	371	371
TRIM44	0.289275	1.38841e-08	1.83057e-07	371	371
TET1	0.289202	1.40059e-08	1.84419e-07	371	371
HCG18	0.289166	1.40676e-08	1.85109e-07	371	371
DOCK7	0.289075	1.4221e-08	1.8685e-07	371	371
BRIX1	0.289071	1.4228e-08	1.8685e-07	371	371
TMOD3	0.289048	1.42669e-08	1.87189e-07	371	371
POLA1	0.28894	1.44528e-08	1.89303e-07	371	371
NOL8	0.288906	1.45122e-08	1.89955e-07	371	371
PIP4K2A	0.288849	1.46113e-08	1.91127e-07	371	371
STAM2	0.288714	1.4849e-08	1.93727e-07	371	371
KNTC1	0.288706	1.48623e-08	1.93774e-07	371	371
ZNF644	0.288666	1.49329e-08	1.94567e-07	371	371
MAML2	0.28861	1.50342e-08	1.95759e-07	371	370
TRIM32	0.28849	1.525e-08	1.9831e-07	371	371
SLK	0.288425	1.5369e-08	1.99726e-07	371	371
KIF3C	0.288364	1.54815e-08	2.01057e-07	371	371
GALNT7	0.288149	1.58832e-08	2.0614e-07	371	370
MPP6	0.288029	1.61129e-08	2.08985e-07	371	371
ZNF549	0.288009	1.61517e-08	2.09352e-07	371	370
MST4	0.28795	1.62661e-08	2.10561e-07	371	371
C9orf41	0.28793	1.63036e-08	2.10909e-07	371	370
C1orf9	0.287846	1.64675e-08	2.12661e-07	371	371
SLC5A3	0.287844	1.6471e-08	2.12661e-07	371	371
BOD1L	0.28782	1.65185e-08	2.13135e-07	371	371
PLXNA1	0.287557	1.7044e-08	2.19348e-07	371	371
AP1S3	0.287541	1.70766e-08	2.19626e-07	371	371
WASF1	0.287433	1.72976e-08	2.22181e-07	371	371
AFTPH	0.287297	1.7579e-08	2.25505e-07	371	371
MED23	0.287219	1.77431e-08	2.27317e-07	371	371
HELB	0.2872	1.77839e-08	2.27693e-07	371	368
BICC1	0.286722	1.88204e-08	2.40346e-07	371	343
CCDC88A	0.286708	1.8853e-08	2.40455e-07	371	371
TMEM194A	0.286643	1.89994e-08	2.42011e-07	371	371
RSBN1L	0.286621	1.9049e-08	2.42356e-07	371	371
SNX16	0.286459	1.94172e-08	2.46231e-07	371	371
MAPK1	0.286446	1.94459e-08	2.46438e-07	371	371
ZNF321	0.286376	1.96084e-08	2.48024e-07	371	363
TACC1	0.286313	1.97567e-08	2.49741e-07	371	371
C14orf129	0.28627	1.98569e-08	2.50623e-07	371	371
METTL4	0.286267	1.98642e-08	2.50623e-07	371	371
AMPD3	0.286099	2.02614e-08	2.55312e-07	371	371
SHQ1	0.286089	2.02853e-08	2.55451e-07	371	371
CEBPZ	0.286024	2.04421e-08	2.57101e-07	371	371
CSE1L	0.28601	2.04768e-08	2.57212e-07	371	371
VPRBP	0.285979	2.0551e-08	2.57866e-07	371	371
ACTR6	0.285978	2.05548e-08	2.57866e-07	371	371
ERMP1	0.285928	2.06752e-08	2.58892e-07	371	371
ABCE1	0.285928	2.06755e-08	2.58892e-07	371	371
WBP5	0.285919	2.06985e-08	2.59017e-07	371	371
KBTBD8	0.285913	2.07121e-08	2.59024e-07	371	370
PAFAH1B2	0.285862	2.08376e-08	2.60268e-07	371	371
BDP1	0.285784	2.10306e-08	2.62349e-07	371	371
C14orf145	0.285745	2.11268e-08	2.63384e-07	371	370
DKC1	0.285709	2.12177e-08	2.64352e-07	371	371
KTN1	0.285676	2.13002e-08	2.65214e-07	371	371
SRP72	0.28558	2.15447e-08	2.67924e-07	371	371
S1PR3	0.285569	2.15727e-08	2.68104e-07	371	371
YAP1	0.285545	2.1633e-08	2.68686e-07	371	371
ZNF37A	0.285499	2.17516e-08	2.69991e-07	371	371
ATG3	0.28543	2.19291e-08	2.71855e-07	371	371
DENND1B	0.285365	2.20961e-08	2.73755e-07	371	371
ZNF829	0.285354	2.21252e-08	2.73946e-07	371	329
ZNF615	0.285317	2.22237e-08	2.74995e-07	371	371
GPN1	0.285262	2.23667e-08	2.76592e-07	371	371
CAPN7	0.285201	2.25282e-08	2.78244e-07	371	371
ZNF192	0.285185	2.25702e-08	2.78589e-07	371	371
CBX1	0.285153	2.26572e-08	2.7949e-07	371	371
WHSC1	0.285033	2.29792e-08	2.83112e-07	371	371
ZNF643	0.285015	2.30265e-08	2.8352e-07	371	370
CASP8AP2	0.284918	2.32913e-08	2.86426e-07	371	371
SFRS3	0.284841	2.35033e-08	2.88777e-07	371	371
ERGIC2	0.284838	2.35115e-08	2.88777e-07	371	371
DNAL1	0.284805	2.36048e-08	2.89566e-07	371	371
LCA5	0.284748	2.37623e-08	2.91319e-07	371	369
MON2	0.284709	2.38711e-08	2.92473e-07	371	371
C5orf28	0.284685	2.39405e-08	2.93143e-07	371	371
PDZD8	0.284677	2.39612e-08	2.93215e-07	371	371
CCDC46	0.284665	2.39949e-08	2.93448e-07	371	371
MSH2	0.28465	2.40396e-08	2.93814e-07	371	371
ANKS1A	0.284532	2.43745e-08	2.9736e-07	371	371
LCOR	0.284519	2.44116e-08	2.97612e-07	371	370
KIF23	0.284412	2.472e-08	3.00654e-07	371	371
RNF4	0.284406	2.47364e-08	3.00671e-07	371	371
ELF4	0.284205	2.53274e-08	3.07291e-07	371	371
STK38L	0.284186	2.53842e-08	3.07793e-07	371	371
VPS35	0.284133	2.5543e-08	3.0953e-07	371	371
RBBP7	0.284045	2.58092e-08	3.12376e-07	371	371
RABGAP1	0.284005	2.59289e-08	3.13634e-07	371	371
GINS4	0.283871	2.63406e-08	3.17843e-07	371	371
ANKRD52	0.283839	2.64405e-08	3.18661e-07	371	371
DNAJC21	0.283822	2.64922e-08	3.19091e-07	371	371
ZDHHC17	0.283692	2.68986e-08	3.23205e-07	371	371
CKAP2	0.283675	2.69531e-08	3.23665e-07	371	371
FAM117B	0.283595	2.7206e-08	3.26505e-07	371	371
SACM1L	0.283503	2.75009e-08	3.29646e-07	371	371
ZNF678	0.283473	2.75983e-08	3.30616e-07	371	369
F3	0.283465	2.76242e-08	3.30715e-07	371	371
C7orf68	0.283347	2.80074e-08	3.34711e-07	371	371
FANCB	0.283305	2.81455e-08	3.3616e-07	371	364
LOC100271836	0.283288	2.82037e-08	3.36653e-07	371	371
ZEB1	0.283279	2.82304e-08	3.3677e-07	371	371
RPGR	0.283114	2.87823e-08	3.42933e-07	371	370
TRAF6	0.283104	2.88159e-08	3.42933e-07	371	371
MLL	0.283034	2.90525e-08	3.45543e-07	371	371
UBXN4	0.283024	2.90867e-08	3.45743e-07	371	371
LDLRAD3	0.282957	2.93166e-08	3.48061e-07	371	366
EAF1	0.282924	2.94278e-08	3.49173e-07	371	371
RACGAP1	0.282915	2.94594e-08	3.49339e-07	371	371
MED21	0.282891	2.95403e-08	3.5009e-07	371	371
WDR12	0.282877	2.95898e-08	3.50468e-07	371	371
ESCO2	0.282841	2.97141e-08	3.51562e-07	371	371
GOLGA7	0.28284	2.97175e-08	3.51562e-07	371	371
KIAA0528	0.282717	3.01481e-08	3.56445e-07	371	371
PTPN13	0.282703	3.0196e-08	3.568e-07	371	367
SACS	0.282655	3.03679e-08	3.58618e-07	371	371
EPS15	0.282547	3.07508e-08	3.62675e-07	371	371
SLC8A1	0.282543	3.0766e-08	3.62675e-07	371	371
MSR1	0.282534	3.0798e-08	3.62837e-07	371	371
NEXN	0.282507	3.08956e-08	3.63771e-07	371	371
ZNF440	0.282498	3.09281e-08	3.6394e-07	371	371
SPIN4	0.282414	3.1232e-08	3.66866e-07	371	371
CEP152	0.282399	3.12865e-08	3.67289e-07	371	371
C9orf102	0.282371	3.139e-08	3.68287e-07	371	371
ATL3	0.282355	3.14501e-08	3.68775e-07	371	371
CCDC14	0.282314	3.15994e-08	3.70308e-07	371	371
CYSLTR2	0.282262	3.17902e-08	3.72106e-07	371	330
NFXL1	0.282244	3.18567e-08	3.72665e-07	371	371
ZNF136	0.282209	3.19887e-08	3.7399e-07	371	371
PPP2CB	0.282138	3.22528e-08	3.76707e-07	371	371
AP3M1	0.282137	3.22589e-08	3.76707e-07	371	371
LOC653653	0.282052	3.25782e-08	3.80213e-07	371	364
HOOK3	0.282038	3.263e-08	3.80594e-07	371	371
PIAS3	0.28193	3.30452e-08	3.85211e-07	371	371
SEC62	0.281886	3.32123e-08	3.86707e-07	371	371
ZNF236	0.281762	3.36951e-08	3.91642e-07	371	371
LASS6	0.281757	3.37158e-08	3.9165e-07	371	371
RSBN1	0.281752	3.37351e-08	3.9165e-07	371	371
DCK	0.281729	3.38246e-08	3.92231e-07	371	371
YLPM1	0.28165	3.41363e-08	3.95386e-07	371	371
YWHAB	0.281598	3.43434e-08	3.97553e-07	371	371
USP16	0.281453	3.49293e-08	4.03397e-07	371	371
CCDC99	0.281372	3.52595e-08	4.06975e-07	371	371
NUDT11	0.281286	3.5613e-08	4.10817e-07	371	281
UBE2K	0.281192	3.60007e-08	4.15046e-07	371	371
BRD7P3	0.281187	3.60212e-08	4.15046e-07	371	109
GPD1L	0.281164	3.61182e-08	4.15683e-07	371	371
PLSCR1	0.281143	3.62063e-08	4.16456e-07	371	371
TMEM106B	0.281089	3.64348e-08	4.18842e-07	371	371
THAP1	0.281083	3.64588e-08	4.18877e-07	371	371
METAP2	0.281065	3.65344e-08	4.19503e-07	371	371
GPR63	0.2809	3.72429e-08	4.27147e-07	371	236
MMP12	0.280819	3.75934e-08	4.30918e-07	371	304
GOLGA4	0.280808	3.76397e-08	4.312e-07	371	371
TXNDC9	0.280802	3.76691e-08	4.3129e-07	371	371
ARHGAP21	0.280789	3.7725e-08	4.31433e-07	371	371
FEZ2	0.280688	3.81674e-08	4.36134e-07	371	371
DAB2	0.280671	3.82425e-08	4.366e-07	371	371
SAP130	0.28064	3.83824e-08	4.37947e-07	371	371
ZNF320	0.280579	3.86521e-08	4.40771e-07	371	371
ARHGAP12	0.280528	3.88796e-08	4.42896e-07	371	371
CUL2	0.280487	3.90641e-08	4.44451e-07	371	371
SRGAP1	0.280405	3.9437e-08	4.48438e-07	371	371
C9orf110	0.280335	3.97578e-08	4.51313e-07	371	350
BPTF	0.280197	4.03996e-08	4.58077e-07	371	371
XRN1	0.280082	4.09381e-08	4.63392e-07	371	371
B4GALT5	0.28003	4.11852e-08	4.65924e-07	371	371
RAD21	0.280014	4.12619e-08	4.66508e-07	371	371
PMS1	0.27996	4.15198e-08	4.6891e-07	371	371
STT3B	0.279935	4.16389e-08	4.69827e-07	371	371
KIF11	0.279933	4.16481e-08	4.69827e-07	371	371
C3orf33	0.279918	4.17204e-08	4.70376e-07	371	371
ITGA4	0.2799	4.18088e-08	4.71106e-07	371	371
INO80D	0.279848	4.20618e-08	4.73689e-07	371	371
KLF7	0.279739	4.25928e-08	4.78743e-07	371	361
ENTPD4	0.279736	4.26068e-08	4.78743e-07	371	371
CLEC5A	0.279644	4.30616e-08	4.83581e-07	371	332
PIAS2	0.279598	4.32921e-08	4.85896e-07	371	371
KLHL24	0.279571	4.34266e-08	4.87131e-07	371	371
SLC33A1	0.27949	4.38312e-08	4.91117e-07	371	371
PRKRA	0.279479	4.38895e-08	4.91493e-07	371	371
ORC4L	0.279381	4.43879e-08	4.96796e-07	371	371
NCOA3	0.279346	4.45633e-08	4.98479e-07	371	371
PLAUR	0.279083	4.59374e-08	5.13273e-07	371	371
TAF2	0.278936	4.67198e-08	5.21722e-07	371	371
UBR2	0.27893	4.67519e-08	5.21788e-07	371	371
PCDP1	0.278917	4.68221e-08	5.22279e-07	371	316
ROCK2	0.278735	4.78104e-08	5.33004e-07	371	371
IFRD1	0.278684	4.80931e-08	5.35856e-07	371	371
HMGN4	0.278644	4.83115e-08	5.37988e-07	371	371
ZNF331	0.278622	4.84357e-08	5.3907e-07	371	371
FIGNL1	0.27858	4.8669e-08	5.40805e-07	371	371
PLAGL1	0.278579	4.8673e-08	5.40805e-07	371	371
ZNF713	0.278559	4.87846e-08	5.41743e-07	371	370
MIER1	0.278344	5.00038e-08	5.54664e-07	371	371
AKT3	0.278325	5.01127e-08	5.55301e-07	371	371
KIF21A	0.278325	5.0117e-08	5.55301e-07	371	371
FAM55C	0.278251	5.05424e-08	5.59392e-07	371	371
XRCC5	0.278153	5.11118e-08	5.65066e-07	371	371
SEC22B	0.278112	5.13542e-08	5.67117e-07	371	371
DDX52	0.278093	5.14636e-08	5.6801e-07	371	371
POGK	0.278082	5.15326e-08	5.68456e-07	371	371
RASSF3	0.278028	5.18473e-08	5.71611e-07	371	364
SLC25A40	0.278009	5.19635e-08	5.72576e-07	371	371
COPS2	0.277819	5.31039e-08	5.8385e-07	371	371
ETF1	0.277739	5.35941e-08	5.88914e-07	371	371
MATN3	0.277685	5.39264e-08	5.92239e-07	371	351
LARP4B	0.277632	5.42552e-08	5.95521e-07	371	371
UBR5	0.277617	5.43466e-08	5.96196e-07	371	371
TMEM67	0.277528	5.4904e-08	6.0198e-07	371	371
SGPP1	0.277465	5.52983e-08	6.0597e-07	371	371
RAD51AP1	0.277311	5.62828e-08	6.14729e-07	371	371
XPR1	0.277236	5.67679e-08	6.19348e-07	371	371
DZIP1L	0.277145	5.73578e-08	6.25441e-07	371	369
MMD	0.277074	5.78274e-08	6.30218e-07	371	371
SETD2	0.276935	5.8752e-08	6.39594e-07	371	371
LZTFL1	0.276889	5.90623e-08	6.42621e-07	371	371
BACH1	0.276872	5.91744e-08	6.43489e-07	371	371
TCTN2	0.276831	5.94544e-08	6.46181e-07	371	371
GMCL1	0.276774	5.98404e-08	6.49996e-07	371	371
REST	0.276766	5.98912e-08	6.49996e-07	371	370
ANKRD36BP1	0.276757	5.99525e-08	6.50176e-07	371	360
ARL14	0.276683	6.04656e-08	6.54671e-07	371	316
ZNF570	0.276655	6.06573e-08	6.56391e-07	371	370
IKZF4	0.276612	6.09523e-08	6.58867e-07	371	371
SBNO1	0.276445	6.2122e-08	6.71147e-07	371	367
DYNC2H1	0.276436	6.21906e-08	6.71524e-07	371	368
PWWP2A	0.276277	6.3324e-08	6.83391e-07	371	371
FAM126A	0.276268	6.33861e-08	6.83691e-07	371	371
MTHFD2	0.276133	6.4368e-08	6.91661e-07	371	371
GPR183	0.276088	6.46982e-08	6.94574e-07	371	371
LMBR1	0.276087	6.47088e-08	6.94574e-07	371	371
GDAP1	0.276069	6.48369e-08	6.95574e-07	371	370
NAP1L1	0.276012	6.52615e-08	6.99752e-07	371	371
LONRF1	0.275936	6.58258e-08	7.05424e-07	371	371
DIMT1L	0.275839	6.65572e-08	7.1173e-07	371	371
PRKDC	0.275807	6.67985e-08	7.13544e-07	371	371
FUT10	0.275651	6.79884e-08	7.25088e-07	371	371
KIAA1586	0.275602	6.8371e-08	7.28778e-07	371	371
ASAH1	0.275482	6.93068e-08	7.37963e-07	371	371
ZMIZ1	0.275448	6.95788e-08	7.40068e-07	371	371
RAB3GAP1	0.275442	6.96228e-08	7.40142e-07	371	371
ZMYND11	0.275406	6.99097e-08	7.424e-07	371	371
PAQR8	0.275229	7.13262e-08	7.56233e-07	371	371
PQLC3	0.275223	7.13708e-08	7.56303e-07	371	371
TAS2R31	0.275166	7.18327e-08	7.60793e-07	371	176
C1orf124	0.275155	7.19265e-08	7.61381e-07	371	371
TEAD1	0.275115	7.22538e-08	7.63629e-07	371	371
CKAP4	0.275061	7.26982e-08	7.67511e-07	371	371
CBLB	0.275026	7.29793e-08	7.70071e-07	371	371
NAB1	0.274912	7.39336e-08	7.78491e-07	371	371
REL	0.274893	7.40856e-08	7.79679e-07	371	370
RBL1	0.274875	7.4241e-08	7.80902e-07	371	371
ZNF880	0.274805	7.48278e-08	7.8583e-07	371	367
CHMP1B	0.274797	7.48978e-08	7.86122e-07	371	371
PUM1	0.274793	7.49345e-08	7.86122e-07	371	371
FBN2	0.274652	7.61397e-08	7.97086e-07	371	346
SPAG17	0.274552	7.70004e-08	8.03563e-07	371	170
DHX40	0.274493	7.75189e-08	8.08518e-07	371	371
RPAP2	0.274489	7.75564e-08	8.08518e-07	371	371
GABPA	0.274435	7.80306e-08	8.12339e-07	371	371
UBE2W	0.274395	7.83762e-08	8.15358e-07	371	371
CENPQ	0.274326	7.89903e-08	8.21318e-07	371	371
ZNF506	0.274244	7.97247e-08	8.27657e-07	371	371
2019-09-10	0.274214	7.9999e-08	8.30072e-07	371	371
ZNF415	0.274139	8.06747e-08	8.36648e-07	371	369
ASB3	0.274132	8.0744e-08	8.36931e-07	371	371
VPS24	0.27407	8.13071e-08	8.41892e-07	371	371
CRTC3	0.274027	8.16982e-08	8.45502e-07	371	371
COLEC12	0.273979	8.21495e-08	8.49731e-07	371	365
CACNA2D1	0.273964	8.22822e-08	8.50662e-07	371	255
PRKG1	0.273903	8.28531e-08	8.5612e-07	371	343
BTBD8	0.273744	8.4346e-08	8.71094e-07	371	276
KLHL28	0.273633	8.54105e-08	8.81631e-07	371	371
TRIP13	0.273622	8.55175e-08	8.82278e-07	371	371
C12orf4	0.273563	8.60877e-08	8.87701e-07	371	371
ARMC9	0.273414	8.75412e-08	9.02222e-07	371	371
RGPD4	0.273344	8.82317e-08	9.08868e-07	371	371
ZNF304	0.273303	8.86364e-08	9.12566e-07	371	371
AFAP1L1	0.273277	8.8904e-08	9.14848e-07	371	371
ATF7IP	0.273239	8.92785e-08	9.18227e-07	371	371
SLBP	0.273203	8.96405e-08	9.21474e-07	371	371
ARHGAP11B	0.273126	9.04173e-08	9.28918e-07	371	338
INTS6	0.273026	9.14477e-08	9.386e-07	371	371
TNFAIP3	0.273013	9.15734e-08	9.39405e-07	371	371
KIAA0753	0.273003	9.16794e-08	9.40009e-07	371	371
MIPOL1	0.272969	9.20296e-08	9.43114e-07	371	371
IRAK1BP1	0.272888	9.28743e-08	9.51281e-07	371	365
ZNF551	0.272781	9.3992e-08	9.61246e-07	371	369
CDKL1	0.272708	9.47673e-08	9.68679e-07	371	347
TRUB1	0.272683	9.50324e-08	9.7089e-07	371	371
ZMYM1	0.272634	9.55542e-08	9.74722e-07	371	371
C5orf62	0.272565	9.62948e-08	9.81732e-07	371	371
ZNF189	0.272556	9.63947e-08	9.81732e-07	371	371
KLHL5	0.272554	9.64132e-08	9.81732e-07	371	371
PSMD14	0.272506	9.69329e-08	9.858e-07	371	371
TSN	0.272506	9.69372e-08	9.858e-07	371	371
TM6SF1	0.272494	9.70679e-08	9.86123e-07	371	371
ANKLE2	0.272426	9.78045e-08	9.92593e-07	371	371
BLZF1	0.272344	9.87073e-08	1.00125e-06	371	371
HIPK1	0.2723	9.91979e-08	1.00571e-06	371	371
RCN2	0.272295	9.92561e-08	1.00579e-06	371	371
SLC35F5	0.272206	1.0025e-07	1.01483e-06	371	371
TTC14	0.272173	1.00614e-07	1.01799e-06	371	371
CHD6	0.272099	1.01455e-07	1.02546e-06	371	371
RUNX1	0.272001	1.02577e-07	1.03627e-06	371	371
EIF2S1	0.271981	1.02804e-07	1.03804e-06	371	371
ZNF256	0.271919	1.03522e-07	1.04476e-06	371	370
ATXN1	0.271883	1.03932e-07	1.04838e-06	371	371
CENPL	0.271855	1.04261e-07	1.05063e-06	371	371
DLEU7	0.271717	1.05879e-07	1.06586e-06	371	228
SERP1	0.271695	1.06146e-07	1.068e-06	371	371
ARMCX2	0.271516	1.08288e-07	1.08735e-06	371	371
MGAT5	0.271462	1.08943e-07	1.09283e-06	371	360
EPS8	0.271415	1.09507e-07	1.09794e-06	371	371
CD84	0.27141	1.09574e-07	1.09805e-06	371	370
RFX7	0.27136	1.1019e-07	1.10368e-06	371	371
TEX15	0.271308	1.10823e-07	1.10849e-06	371	142
C2orf60	0.271267	1.11334e-07	1.11289e-06	371	371
LAMB1	0.27116	1.12676e-07	1.12574e-06	371	371
SOS1	0.271155	1.12737e-07	1.12579e-06	371	371
ITPR3	0.271023	1.14409e-07	1.14191e-06	371	371
PTBP2	0.270981	1.14946e-07	1.14612e-06	371	371
MMP10	0.270954	1.15292e-07	1.14843e-06	371	278
ARID4B	0.270871	1.16354e-07	1.15842e-06	371	371
ZZZ3	0.270808	1.17182e-07	1.16551e-06	371	371
ZNF621	0.270764	1.17755e-07	1.17003e-06	371	371
CCNT1	0.270658	1.19142e-07	1.18323e-06	371	363
ZNF229	0.270501	1.21252e-07	1.20238e-06	371	368
PNPLA8	0.270339	1.23451e-07	1.22358e-06	371	371
SGPP2	0.270327	1.2361e-07	1.22455e-06	371	318
BTBD3	0.270304	1.23925e-07	1.22706e-06	371	371
RNF160	0.270151	1.26057e-07	1.24693e-06	371	371
ETNK1	0.270103	1.26723e-07	1.25227e-06	371	371
ZNF630	0.270031	1.27743e-07	1.26173e-06	371	362
SMC3	0.269973	1.28564e-07	1.26858e-06	371	371
PPP4R1	0.269941	1.29025e-07	1.27249e-06	371	371
LETM2	0.269867	1.30083e-07	1.28153e-06	371	368
C19orf55	0.269839	1.30487e-07	1.28437e-06	371	371
SETX	0.269829	1.30638e-07	1.28496e-06	371	371
RCAN3	0.269803	1.31019e-07	1.28769e-06	371	365
GOLPH3	0.269768	1.3153e-07	1.29154e-06	371	371
LOC150786	0.269751	1.31776e-07	1.29323e-06	371	370
USP28	0.269674	1.32902e-07	1.30363e-06	371	371
ZNF793	0.269637	1.3344e-07	1.30762e-06	371	367
STX3	0.26962	1.33693e-07	1.30945e-06	371	371
VCAN	0.269577	1.34341e-07	1.31466e-06	371	371
MPZL1	0.269559	1.34597e-07	1.31637e-06	371	371
MIER3	0.269552	1.34707e-07	1.3168e-06	371	371
NCK2	0.269477	1.35827e-07	1.32645e-06	371	371
ALDH1L2	0.269428	1.36568e-07	1.33222e-06	371	369
RNF115	0.269425	1.36619e-07	1.33222e-06	371	371
TRNT1	0.269418	1.36718e-07	1.33253e-06	371	371
C13orf37	0.269335	1.37981e-07	1.34327e-06	371	371
ZNF702P	0.269332	1.38022e-07	1.34327e-06	371	360
DDX6	0.269277	1.3887e-07	1.34994e-06	371	371
CCDC66	0.269103	1.41565e-07	1.3744e-06	371	371
ABCC1	0.26908	1.41924e-07	1.37721e-06	371	371
KIAA1432	0.269057	1.42289e-07	1.38007e-06	371	371
NIPA2	0.269014	1.42961e-07	1.38592e-06	371	371
RRAS2	0.269005	1.4311e-07	1.38669e-06	371	371
ZSCAN20	0.268992	1.43314e-07	1.38772e-06	371	371
ESF1	0.268985	1.43421e-07	1.38772e-06	371	371
SMARCD1	0.268915	1.44535e-07	1.39778e-06	371	371
ARHGAP29	0.268898	1.44814e-07	1.3998e-06	371	371
RBM7	0.268722	1.47652e-07	1.42447e-06	371	371
SYNGAP1	0.268712	1.47818e-07	1.42538e-06	371	371
CEP78	0.268652	1.488e-07	1.43416e-06	371	371
RAB27B	0.268636	1.49065e-07	1.43602e-06	371	290
MAP4K4	0.268595	1.49732e-07	1.44174e-06	371	371
ZFX	0.268577	1.50034e-07	1.44395e-06	371	371
KIAA1949	0.268561	1.50303e-07	1.4456e-06	371	371
TMPO	0.268558	1.50351e-07	1.4456e-06	371	371
ZNF326	0.268535	1.5073e-07	1.44855e-06	371	371
LRP12	0.268514	1.51074e-07	1.45115e-06	371	371
RNF138P1	0.268503	1.51268e-07	1.45232e-06	371	367
NRP1	0.268491	1.51462e-07	1.45349e-06	371	371
RAB23	0.268385	1.53247e-07	1.4699e-06	371	371
LIMK1	0.268327	1.54234e-07	1.47866e-06	371	371
HSP90AA1	0.268297	1.54731e-07	1.48271e-06	371	371
ATM	0.268288	1.54895e-07	1.48357e-06	371	371
PLA2R1	0.268263	1.55323e-07	1.48695e-06	371	355
ARHGAP11A	0.268199	1.5642e-07	1.49674e-06	371	371
RAB31	0.268178	1.5677e-07	1.49829e-06	371	371
KRT80	0.268175	1.56824e-07	1.49829e-06	371	355
AKAP11	0.268172	1.56884e-07	1.49829e-06	371	371
KDM3B	0.268143	1.57392e-07	1.50243e-06	371	371
ZFP28	0.267913	1.61422e-07	1.53942e-06	371	369
ULBP3	0.267875	1.62092e-07	1.54507e-06	371	316
NGLY1	0.267675	1.65689e-07	1.57579e-06	371	371
KIAA0494	0.267613	1.66833e-07	1.58495e-06	371	371
ZBTB43	0.267487	1.69163e-07	1.60556e-06	371	371
KLC1	0.267379	1.71181e-07	1.62394e-06	371	371
SSR1	0.267312	1.72437e-07	1.63432e-06	371	371
LOC729799	0.267287	1.72906e-07	1.63796e-06	371	345
MARCKS	0.267194	1.74682e-07	1.65322e-06	371	371
AMMECR1	0.267156	1.75419e-07	1.6594e-06	371	371
HPS3	0.267074	1.76991e-07	1.67269e-06	371	371
SFMBT2	0.266975	1.78935e-07	1.68999e-06	371	357
PHF3	0.266972	1.78992e-07	1.68999e-06	371	371
SLC2A3	0.266845	1.81487e-07	1.71273e-06	371	371
STARD3NL	0.266713	1.84139e-07	1.73612e-06	371	371
REV3L	0.266705	1.84293e-07	1.73674e-06	371	371
SECISBP2L	0.266666	1.8509e-07	1.74261e-06	371	371
ZNF461	0.266626	1.85887e-07	1.74929e-06	371	371
HNRNPF	0.266619	1.86045e-07	1.74995e-06	371	371
TFEC	0.266598	1.86476e-07	1.75234e-06	371	370
ZNF586	0.266537	1.87722e-07	1.76322e-06	371	371
BAZ1B	0.266284	1.92989e-07	1.81013e-06	371	371
TMEM87A	0.266206	1.94637e-07	1.82387e-06	371	371
XPO4	0.266134	1.96163e-07	1.83644e-06	371	371
ZNF510	0.266103	1.96837e-07	1.84144e-06	371	371
ZNF135	0.266099	1.96915e-07	1.84144e-06	371	368
B3GNT2	0.266097	1.96973e-07	1.84144e-06	371	371
TES	0.266032	1.98359e-07	1.8533e-06	371	371
SLAIN2	0.266029	1.98429e-07	1.8533e-06	371	371
GALNT1	0.265987	1.9934e-07	1.86095e-06	371	371
C1orf58	0.265944	2.0027e-07	1.86875e-06	371	371
AMMECR1L	0.265926	2.00684e-07	1.87094e-06	371	371
TMEM188	0.265925	2.00693e-07	1.87094e-06	371	371
SENP7	0.265919	2.00826e-07	1.87131e-06	371	371
RMI1	0.265853	2.02271e-07	1.88389e-06	371	371
NAA40	0.265824	2.02908e-07	1.88894e-06	371	371
RGS1	0.265764	2.04247e-07	1.89874e-06	371	370
P2RY1	0.265705	2.05578e-07	1.91022e-06	371	350
GTF2A1	0.265639	2.07055e-07	1.92305e-06	371	369
RGS2	0.265607	2.07781e-07	1.92796e-06	371	371
CCDC109A	0.265486	2.10538e-07	1.95086e-06	371	371
MAPK6	0.265409	2.12308e-07	1.96452e-06	371	371
CKAP2L	0.265372	2.1316e-07	1.97149e-06	371	370
CDK12	0.265362	2.13385e-07	1.97265e-06	371	371
ADORA2B	0.265342	2.13857e-07	1.9761e-06	371	367
USP45	0.265325	2.14248e-07	1.97879e-06	371	371
NCRNA00120	0.265208	2.17001e-07	2.00329e-06	371	353
ZNF772	0.265169	2.17926e-07	2.0109e-06	371	370
MGA	0.26512	2.19097e-07	2.02076e-06	371	371
ZNF391	0.265044	2.20912e-07	2.03657e-06	371	299
TREM1	0.264957	2.23009e-07	2.05495e-06	371	347
MAP3K9	0.264867	2.2519e-07	2.07312e-06	371	371
FAM48A	0.264863	2.25294e-07	2.07313e-06	371	371
2019-03-06	0.264792	2.2704e-07	2.08726e-06	371	371
RAB39	0.264776	2.27426e-07	2.08984e-06	371	301
ZC3H14	0.264739	2.28353e-07	2.0974e-06	371	371
CFLAR	0.264663	2.30233e-07	2.11174e-06	371	371
ATAD5	0.264569	2.32597e-07	2.13244e-06	371	371
ZNF681	0.264389	2.3719e-07	2.17155e-06	371	369
PREPL	0.264369	2.37693e-07	2.17516e-06	371	371
SON	0.264356	2.38039e-07	2.17733e-06	371	371
DOCK10	0.264227	2.41381e-07	2.20688e-06	371	371
C5orf42	0.264158	2.43212e-07	2.22057e-06	371	371
KIAA1841	0.263937	2.49098e-07	2.27118e-06	371	371
ULBP1	0.263854	2.51325e-07	2.28968e-06	371	329
PLCL1	0.263851	2.51406e-07	2.28968e-06	371	370
KCMF1	0.263797	2.52902e-07	2.30165e-06	371	371
TTF1	0.263791	2.53058e-07	2.30202e-06	371	371
CSF1	0.263781	2.53327e-07	2.30341e-06	371	371
LRP8	0.263689	2.55858e-07	2.3243e-06	371	369
VHL	0.263669	2.56413e-07	2.32802e-06	371	371
CMTM1	0.26365	2.56937e-07	2.33092e-06	371	371
NARG2	0.263572	2.59111e-07	2.34957e-06	371	371
ZNF878	0.263551	2.59701e-07	2.35281e-06	371	296
EXT2	0.263551	2.59704e-07	2.35281e-06	371	371
NAPG	0.263497	2.61239e-07	2.36435e-06	371	371
DDX46	0.263458	2.62327e-07	2.37226e-06	371	371
ZNF264	0.263402	2.63923e-07	2.38561e-06	371	371
UHMK1	0.263359	2.65147e-07	2.39558e-06	371	371
ZNF417	0.263335	2.65838e-07	2.40073e-06	371	371
RBMX	0.2633	2.66857e-07	2.40776e-06	371	371
LOC344595	0.26319	2.70015e-07	2.43377e-06	371	370
VEPH1	0.263187	2.70107e-07	2.43377e-06	371	304
KDM5A	0.263116	2.722e-07	2.45152e-06	371	371
ING3	0.263064	2.73722e-07	2.463e-06	371	371
ETV3	0.263023	2.74925e-07	2.47271e-06	371	366
UBQLN1	0.263012	2.75265e-07	2.47465e-06	371	371
JARID2	0.262971	2.76486e-07	2.48339e-06	371	371
PPIP5K2	0.262935	2.7756e-07	2.49191e-06	371	371
ZNF43	0.262738	2.83521e-07	2.54199e-06	371	371
SETD5	0.262695	2.84836e-07	2.55148e-06	371	371
ZBTB24	0.262612	2.87378e-07	2.5731e-06	371	371
BLM	0.2626	2.87741e-07	2.57519e-06	371	371
SPIN3	0.262563	2.88901e-07	2.58441e-06	371	371
NBN	0.262533	2.89832e-07	2.59158e-06	371	371
PTAR1	0.262493	2.9109e-07	2.60166e-06	371	371
RAB11A	0.262478	2.91552e-07	2.60462e-06	371	371
PRSS16	0.26245	2.92429e-07	2.61011e-06	371	255
TMEM51	0.262378	2.94708e-07	2.62927e-06	371	371
IL31RA	0.26236	2.95275e-07	2.63315e-06	371	201
MARK1	0.262352	2.95551e-07	2.63326e-06	371	367
M6PR	0.262329	2.96256e-07	2.63605e-06	371	371
TOPORS	0.262329	2.96261e-07	2.63605e-06	371	371
FGFR1	0.262298	2.97257e-07	2.64373e-06	371	371
NCAPG2	0.26216	3.01703e-07	2.68207e-06	371	371
NCOA6	0.262127	3.0278e-07	2.68812e-06	371	371
RRM1	0.262125	3.0284e-07	2.68812e-06	371	371
ZNF623	0.262124	3.02862e-07	2.68812e-06	371	371
DHX57	0.262122	3.02923e-07	2.68812e-06	371	371
KCTD20	0.262112	3.03249e-07	2.68862e-06	371	371
TUSC3	0.262079	3.04322e-07	2.69573e-06	371	370
DDR2	0.262037	3.05713e-07	2.70685e-06	371	366
PCM1	0.261901	3.1019e-07	2.74405e-06	371	371
CNTNAP1	0.261781	3.1422e-07	2.77601e-06	371	371
KLHL9	0.261758	3.14988e-07	2.78156e-06	371	371
C20orf194	0.261659	3.18363e-07	2.80762e-06	371	371
FAM91A1	0.261651	3.18628e-07	2.80872e-06	371	371
GLIS3	0.261595	3.20546e-07	2.82437e-06	371	371
APH1B	0.261494	3.24058e-07	2.85332e-06	371	371
SP1	0.261456	3.25349e-07	2.86164e-06	371	371
BZW2	0.261336	3.29585e-07	2.89633e-06	371	371
C2orf67	0.261321	3.301e-07	2.89958e-06	371	371
SLC34A2	0.261312	3.30424e-07	2.90115e-06	371	273
FAM118B	0.261272	3.31852e-07	2.91008e-06	371	371
TAF1	0.261271	3.3188e-07	2.91008e-06	371	371
OSTM1	0.261247	3.32742e-07	2.91636e-06	371	371
PIAS1	0.261204	3.34269e-07	2.92717e-06	371	371
SPAG1	0.261194	3.34634e-07	2.92908e-06	371	371
VGLL4	0.261137	3.36669e-07	2.9443e-06	371	371
LAMC1	0.261132	3.36841e-07	2.94451e-06	371	371
NAT10	0.261025	3.40725e-07	2.97586e-06	371	371
HAT1	0.261011	3.41221e-07	2.97888e-06	371	371
NID1	0.26095	3.4347e-07	2.99589e-06	371	371
FUT4	0.260932	3.44138e-07	2.99968e-06	371	371
SHCBP1	0.260817	3.48398e-07	3.03224e-06	371	371
DSC2	0.260797	3.49116e-07	3.03583e-06	371	371
ASCC3	0.26068	3.53529e-07	3.07152e-06	371	371
IDE	0.260615	3.55964e-07	3.08999e-06	371	371
ERBB2IP	0.260553	3.58328e-07	3.10915e-06	371	371
C12orf5	0.260525	3.59413e-07	3.11721e-06	371	371
RPS6KA5	0.26042	3.63468e-07	3.151e-06	371	369
POLQ	0.260348	3.66267e-07	3.17389e-06	371	370
FAM179B	0.260334	3.66835e-07	3.17743e-06	371	371
TMEM43	0.260282	3.68857e-07	3.19355e-06	371	371
RGS18	0.260221	3.71265e-07	3.21161e-06	371	364
ZNF484	0.260202	3.72001e-07	3.21659e-06	371	371
TBC1D15	0.260172	3.73204e-07	3.22558e-06	371	371
WDR48	0.260164	3.73527e-07	3.22697e-06	371	371
RGPD3	0.260159	3.73726e-07	3.22729e-06	371	371
FAM105A	0.260145	3.74288e-07	3.23074e-06	371	371
C15orf29	0.260124	3.75118e-07	3.23651e-06	371	371
INTS8	0.260113	3.75576e-07	3.23906e-06	371	371
MYOF	0.26003	3.78879e-07	3.26613e-06	371	371
CD164	0.259967	3.81452e-07	3.28352e-06	371	371
KIAA1377	0.259964	3.81555e-07	3.28352e-06	371	366
ENAH	0.259919	3.8338e-07	3.29637e-06	371	371
LARP6	0.259824	3.87281e-07	3.32704e-06	371	370
HK2	0.259721	3.91557e-07	3.36088e-06	371	370
REV1	0.25959	3.97061e-07	3.40519e-06	371	371
LNPEP	0.25956	3.98339e-07	3.41467e-06	371	371
SOCS6	0.259449	4.03048e-07	3.45207e-06	371	371
C2orf69	0.259419	4.04351e-07	3.46175e-06	371	371
BNIP2	0.259329	4.08213e-07	3.49181e-06	371	371
RANBP6	0.259322	4.08513e-07	3.49288e-06	371	371
DCUN1D5	0.259219	4.13008e-07	3.52828e-06	371	371
MFAP3	0.259213	4.13266e-07	3.52861e-06	371	371
ZNF776	0.259208	4.13515e-07	3.52861e-06	371	371
GOLIM4	0.259206	4.13578e-07	3.52861e-06	371	371
CXCL3	0.259048	4.2059e-07	3.58536e-06	371	337
NKAIN1	0.258742	4.34459e-07	3.69884e-06	371	227
BMI1	0.258719	4.35518e-07	3.70628e-06	371	371
NFYA	0.258713	4.35778e-07	3.70629e-06	371	371
ATF7	0.258663	4.38088e-07	3.72337e-06	371	371
ZNF665	0.258426	4.49228e-07	3.81155e-06	371	323
PPP4R2	0.258412	4.49867e-07	3.81535e-06	371	371
RPA4	0.258284	4.5599e-07	3.86234e-06	371	272
HUWE1	0.258193	4.60445e-07	3.89677e-06	371	371
FANCF	0.258182	4.60969e-07	3.89954e-06	371	371
GNL3	0.257999	4.69935e-07	3.97033e-06	371	371
GCNT1	0.257981	4.70833e-07	3.97623e-06	371	371
RUNX2	0.257931	4.73365e-07	3.99423e-06	371	368
CCDC82	0.257906	4.74575e-07	4.00171e-06	371	371
RFWD3	0.257838	4.78014e-07	4.02834e-06	371	371
C11orf41	0.257781	4.80897e-07	4.0509e-06	371	316
TPR	0.257776	4.81162e-07	4.0509e-06	371	371
NAA16	0.257773	4.81301e-07	4.0509e-06	371	371
PTGS2	0.257769	4.8151e-07	4.05095e-06	371	365
GPATCH8	0.257686	4.85757e-07	4.08323e-06	371	371
GNG12	0.257619	4.89161e-07	4.1101e-06	371	371
CENPK	0.25759	4.90702e-07	4.12132e-06	371	370
MCPH1	0.257455	4.97695e-07	4.17477e-06	371	371
RASA1	0.257436	4.98697e-07	4.18141e-06	371	371
PKN2	0.257421	4.99502e-07	4.18641e-06	371	371
ZNF860	0.257331	5.04252e-07	4.22355e-06	371	277
BEND6	0.257329	5.04359e-07	4.22355e-06	371	279
TMEM206	0.257305	5.05631e-07	4.23243e-06	371	371
SFRS11	0.257241	5.09048e-07	4.25924e-06	371	371
TTBK2	0.257136	5.14701e-07	4.30112e-06	371	371
PRPF39	0.257086	5.17443e-07	4.3186e-06	371	371
WEE1	0.257048	5.19508e-07	4.33402e-06	371	371
RBM17	0.257012	5.21496e-07	4.34878e-06	371	371
MKI67IP	0.256978	5.23331e-07	4.36226e-06	371	371
MBD4	0.256946	5.25121e-07	4.37169e-06	371	371
JPH1	0.256934	5.25765e-07	4.37523e-06	371	347
FAM98A	0.25691	5.27119e-07	4.38466e-06	371	371
ATP10B	0.256878	5.28843e-07	4.39717e-06	371	246
MOBKL1A	0.25679	5.33785e-07	4.4364e-06	371	371
KPNA5	0.256701	5.38815e-07	4.47448e-06	371	368
EPHA6	0.256544	5.47724e-07	4.54278e-06	371	121
LOC729020	0.256528	5.48686e-07	4.54886e-06	371	369
SOX4	0.256502	5.50152e-07	4.55912e-06	371	371
SLC6A6	0.256474	5.51761e-07	4.56977e-06	371	371
TSHZ3	0.256472	5.51895e-07	4.56977e-06	371	371
LUZP1	0.256464	5.52359e-07	4.57171e-06	371	371
TMEM2	0.256376	5.57516e-07	4.61248e-06	371	371
NBEAL1	0.256337	5.5978e-07	4.62928e-06	371	371
TSR1	0.256262	5.64195e-07	4.66385e-06	371	371
ZNF791	0.256213	5.67101e-07	4.68205e-06	371	371
ZNF41	0.256196	5.68098e-07	4.68834e-06	371	371
CDC14A	0.256115	5.72971e-07	4.72455e-06	371	371
STC1	0.256111	5.73198e-07	4.72455e-06	371	371
ROR1	0.256042	5.77353e-07	4.75684e-06	371	312
KDM1B	0.255936	5.83818e-07	4.80612e-06	371	371
CDCA7	0.255871	5.87754e-07	4.832e-06	371	370
ARIH1	0.255869	5.87931e-07	4.832e-06	371	371
RBAK	0.255845	5.8938e-07	4.84191e-06	371	371
HDGFRP3	0.255827	5.90514e-07	4.84923e-06	371	371
RAB28	0.255813	5.91388e-07	4.8544e-06	371	371
CXorf38	0.255744	5.95627e-07	4.88517e-06	371	371
RIPK2	0.255729	5.96555e-07	4.89054e-06	371	371
NAF1	0.255726	5.96773e-07	4.89054e-06	371	371
NF1	0.255711	5.97694e-07	4.89608e-06	371	371
GALNT5	0.255653	6.01327e-07	4.92381e-06	371	215
CCDC76	0.255587	6.05487e-07	4.95177e-06	371	371
SSH2	0.255468	6.13053e-07	5.00748e-06	371	371
GMEB1	0.255421	6.161e-07	5.03031e-06	371	371
GTF3C2	0.255356	6.20311e-07	5.06261e-06	371	371
TULP4	0.255334	6.21716e-07	5.072e-06	371	371
FRAS1	0.255325	6.22285e-07	5.07456e-06	371	362
KLHL23	0.255306	6.23549e-07	5.08228e-06	371	364
LIMCH1	0.255302	6.23778e-07	5.08228e-06	371	371
TARS	0.255269	6.25978e-07	5.09566e-06	371	371
FZD7	0.255266	6.2615e-07	5.09566e-06	371	370
PIK3C3	0.255215	6.29525e-07	5.12103e-06	371	371
BRMS1L	0.255182	6.3164e-07	5.13404e-06	371	371
ZNF439	0.255108	6.36583e-07	5.1721e-06	371	370
C4orf46	0.254991	6.44389e-07	5.23127e-06	371	371
C2orf49	0.254975	6.45461e-07	5.23783e-06	371	371
MTBP	0.254801	6.57244e-07	5.33128e-06	371	371
SPTLC2	0.254724	6.62575e-07	5.37233e-06	371	371
PCDHGA11	0.254627	6.693e-07	5.42025e-06	371	327
DLGAP1	0.254602	6.71006e-07	5.42964e-06	371	238
GTDC1	0.254574	6.72969e-07	5.44332e-06	371	371
ZNF217	0.254561	6.73912e-07	5.44873e-06	371	371
KAL1	0.254536	6.75672e-07	5.46074e-06	371	367
MRPL50	0.254522	6.76663e-07	5.46653e-06	371	371
TMEM185B	0.254497	6.78411e-07	5.47844e-06	371	371
TSEN15	0.254472	6.80203e-07	5.48846e-06	371	371
CENPI	0.254347	6.89082e-07	5.55785e-06	371	362
PKM2	0.254276	6.94224e-07	5.59705e-06	371	371
APPBP2	0.254231	6.97428e-07	5.62062e-06	371	371
BUB1B	0.254111	7.06199e-07	5.6867e-06	371	371
NRCAM	0.25406	7.09967e-07	5.71473e-06	371	363
ZFYVE16	0.254036	7.11699e-07	5.72636e-06	371	371
CLDN11	0.253924	7.20014e-07	5.78392e-06	371	369
MED12	0.253789	7.30196e-07	5.86099e-06	371	371
SAMSN1	0.253728	7.3483e-07	5.89106e-06	371	371
SCG2	0.253663	7.39842e-07	5.92421e-06	371	308
STRN3	0.253554	7.4822e-07	5.98636e-06	371	371
LYPD6	0.253538	7.49479e-07	5.99403e-06	371	322
ASTE1	0.253533	7.49864e-07	5.9947e-06	371	371
SCTR	0.253477	7.54206e-07	6.02699e-06	371	323
NFATC2	0.2534	7.60261e-07	6.07051e-06	371	342
DNMT1	0.253388	7.61209e-07	6.07565e-06	371	371
IFNGR2	0.253377	7.62059e-07	6.07999e-06	371	371
FNTA	0.253336	7.65287e-07	6.1033e-06	371	371
KIAA0895	0.253217	7.74774e-07	6.16909e-06	371	371
FOXC2	0.253209	7.75463e-07	6.1721e-06	371	317
THUMPD3	0.252985	7.93653e-07	6.30932e-06	371	371
WIPF1	0.252978	7.94223e-07	6.31129e-06	371	371
PLCH1	0.25297	7.94818e-07	6.31129e-06	371	352
NIPSNAP3B	0.252882	8.0213e-07	6.36655e-06	371	370
MFHAS1	0.252875	8.02721e-07	6.3687e-06	371	371
FBXL7	0.252773	8.11231e-07	6.4287e-06	371	371
MX2	0.252772	8.11252e-07	6.4287e-06	371	371
NEK4	0.252744	8.1366e-07	6.44522e-06	371	371
RSPH3	0.252665	8.20263e-07	6.49236e-06	371	371
EP400	0.252626	8.23632e-07	6.51441e-06	371	371
WWC3	0.252625	8.23703e-07	6.51441e-06	371	371
PTPLB	0.252592	8.26485e-07	6.53383e-06	371	371
SUPT16H	0.252566	8.28724e-07	6.54633e-06	371	371
TASP1	0.252499	8.34511e-07	6.58943e-06	371	371
MOSPD2	0.252446	8.39082e-07	6.62028e-06	371	371
YEATS4	0.252421	8.41209e-07	6.63443e-06	371	371
SMG1	0.252337	8.48514e-07	6.6894e-06	371	371
LRRC37A4	0.252309	8.51014e-07	6.70379e-06	371	371
C3orf59	0.252295	8.52194e-07	6.71044e-06	371	371
ZNF827	0.25223	8.57932e-07	6.75029e-06	371	328
FANCD2	0.252214	8.59372e-07	6.75895e-06	371	371
AASDHPPT	0.252193	8.61224e-07	6.76816e-06	371	371
ZNF184	0.252148	8.65274e-07	6.79732e-06	371	371
WISP1	0.252139	8.66077e-07	6.80094e-06	371	363
LSM14A	0.252095	8.69976e-07	6.82508e-06	371	371
PLA2G4A	0.252094	8.70084e-07	6.82508e-06	371	364
YTHDC1	0.252053	8.73735e-07	6.85028e-06	371	371
CEP76	0.252029	8.75873e-07	6.86163e-06	371	371
LOC401093	0.252005	8.78037e-07	6.87589e-06	371	370
HAPLN1	0.251938	8.84123e-07	6.92082e-06	371	230
MSL3	0.251931	8.84746e-07	6.92298e-06	371	371
IMPDH1	0.251833	8.93758e-07	6.98253e-06	371	371
AP3M2	0.251795	8.97228e-07	7.00415e-06	371	371
RAB30	0.251767	8.99856e-07	7.02191e-06	371	371
ELK3	0.251738	9.02525e-07	7.03722e-06	371	370
DCAF10	0.251713	9.04831e-07	7.05244e-06	371	371
B4GALT6	0.251636	9.1207e-07	7.10609e-06	371	371
DDX20	0.251613	9.14263e-07	7.12038e-06	371	371
NHSL2	0.251559	9.19349e-07	7.1572e-06	371	350
STC2	0.251531	9.21948e-07	7.17463e-06	371	371
PHACTR2	0.251512	9.23714e-07	7.18276e-06	371	371
USP9X	0.251302	9.43904e-07	7.32546e-06	371	371
SEMA3C	0.251277	9.4632e-07	7.34135e-06	371	358
ADM	0.251252	9.48739e-07	7.35439e-06	371	371
SCAMP1	0.251241	9.4987e-07	7.3603e-06	371	371
SOS2	0.251237	9.50247e-07	7.36035e-06	371	371
FLJ22536	0.251199	9.53917e-07	7.38487e-06	371	282
ZNF286A	0.251175	9.56279e-07	7.39844e-06	371	371
FAM122B	0.251135	9.60236e-07	7.42617e-06	371	371
ZNF215	0.251028	9.70774e-07	7.50476e-06	371	345
C11orf70	0.250986	9.75003e-07	7.53295e-06	371	234
PELI2	0.250977	9.7586e-07	7.5353e-06	371	370
CD109	0.250939	9.79719e-07	7.55924e-06	371	371
PSMD12	0.2509	9.8362e-07	7.5864e-06	371	371
SNORD116-28	0.250652	1.00895e-06	7.76505e-06	371	325
XYLT1	0.250642	1.00995e-06	7.76839e-06	371	371
XRN2	0.250636	1.01055e-06	7.77007e-06	371	371
SLC7A8	0.250599	1.01444e-06	7.79692e-06	371	371
ANKRD5	0.25057	1.0175e-06	7.81445e-06	371	371
SLC12A2	0.250474	1.02747e-06	7.88189e-06	371	371
C1orf126	0.250381	1.03736e-06	7.94856e-06	371	318
GNG10	0.250367	1.03884e-06	7.95685e-06	371	371
ZNF711	0.250322	1.04359e-06	7.9902e-06	371	364
GNS	0.250311	1.04479e-06	7.99405e-06	371	371
TFG	0.25031	1.0449e-06	7.99405e-06	371	371
SKP2	0.250206	1.0561e-06	8.07353e-06	371	371
NSMAF	0.250139	1.06335e-06	8.1227e-06	371	371
CCNE2	0.250108	1.06671e-06	8.14525e-06	371	371
FBXO21	0.250053	1.07265e-06	8.18433e-06	371	371
CC2D2A	0.249948	1.08427e-06	8.26668e-06	371	371
INPP5F	0.249816	1.09894e-06	8.36889e-06	371	371
ACOT9	0.249799	1.10086e-06	8.37839e-06	371	371
CDKL5	0.249699	1.11216e-06	8.45991e-06	371	308
RAN	0.249666	1.11595e-06	8.479e-06	371	371
SYNJ1	0.249637	1.11925e-06	8.50084e-06	371	371
TDP1	0.249618	1.12134e-06	8.51348e-06	371	371
PTGER4	0.249576	1.12622e-06	8.54729e-06	371	371
ATE1	0.249563	1.12763e-06	8.55471e-06	371	371
FAM59A	0.249496	1.13537e-06	8.60689e-06	371	371
ZEB2	0.249377	1.14931e-06	8.7092e-06	371	371
EMR2	0.249321	1.15577e-06	8.75486e-06	371	371
FMNL2	0.249313	1.15675e-06	8.75898e-06	371	371
FAM190A	0.249281	1.16055e-06	8.78438e-06	371	273
MMP1	0.249237	1.16572e-06	8.82016e-06	371	345
SLIT2	0.249204	1.16969e-06	8.84685e-06	371	345
PLDN	0.249034	1.19002e-06	8.99038e-06	371	371
LRRC49	0.249031	1.19049e-06	8.99049e-06	371	369
ASXL2	0.249025	1.19119e-06	8.99235e-06	371	371
ZMYM5	0.248774	1.22195e-06	9.20673e-06	371	371
KCNE4	0.248652	1.23716e-06	9.30764e-06	371	370
ENPP5	0.248519	1.25394e-06	9.42679e-06	371	340
GAN	0.248352	1.27543e-06	9.58475e-06	371	370
ANGPT1	0.248347	1.27611e-06	9.58622e-06	371	366
TRAF3	0.248311	1.28075e-06	9.61743e-06	371	371
HEATR5B	0.248303	1.28171e-06	9.62105e-06	371	371
TET2	0.248223	1.29215e-06	9.69398e-06	371	371
USP8	0.248214	1.2934e-06	9.6942e-06	371	371
TMEM158	0.248103	1.30799e-06	9.79614e-06	371	368
CHN1	0.248068	1.31265e-06	9.82736e-06	371	371
CHM	0.248029	1.31789e-06	9.85918e-06	371	371
SOCS7	0.248001	1.32163e-06	9.88341e-06	371	371
VPS13C	0.247989	1.32324e-06	9.89175e-06	371	371
FPR3	0.247954	1.32793e-06	9.92314e-06	371	371
ZNF235	0.247946	1.329e-06	9.9274e-06	371	371
ADSS	0.247938	1.33001e-06	9.93124e-06	371	371
USP25	0.247883	1.33744e-06	9.97919e-06	371	371
GSG2	0.247874	1.33863e-06	9.98435e-06	371	369
TFRC	0.247843	1.34292e-06	1.00126e-05	371	371
PCDHB18	0.247802	1.34841e-06	1.00498e-05	371	331
ADAM28	0.24779	1.35014e-06	1.00589e-05	371	355
FAM126B	0.247774	1.35232e-06	1.00714e-05	371	371
TRRAP	0.247602	1.37605e-06	1.02328e-05	371	371
PTPN22	0.247568	1.38071e-06	1.02598e-05	371	369
PAR5	0.247441	1.39862e-06	1.038e-05	371	302
RPS6KA3	0.247439	1.39883e-06	1.038e-05	371	371
ZNF548	0.247438	1.39897e-06	1.038e-05	371	371
BRD3	0.247399	1.40449e-06	1.04171e-05	371	371
ICA1L	0.247385	1.40658e-06	1.04287e-05	371	370
PHF21A	0.247375	1.40797e-06	1.04351e-05	371	371
CSTF2	0.247365	1.40941e-06	1.04419e-05	371	371
PHF13	0.247351	1.41132e-06	1.04521e-05	371	371
LTV1	0.247347	1.41192e-06	1.04527e-05	371	371
PTPRO	0.247322	1.41549e-06	1.04753e-05	371	369
SIAH1	0.247318	1.41609e-06	1.04758e-05	371	371
UBE2J1	0.247243	1.42684e-06	1.05475e-05	371	371
PPRC1	0.247234	1.42816e-06	1.05534e-05	371	371
CTCF	0.247228	1.42893e-06	1.05551e-05	371	371
NUP43	0.247198	1.43332e-06	1.05797e-05	371	371
OSGIN2	0.247175	1.43666e-06	1.06004e-05	371	371
BUB1	0.247142	1.44145e-06	1.06318e-05	371	371
SNORD116-4	0.247132	1.44285e-06	1.06343e-05	371	254
DIP2B	0.247089	1.44915e-06	1.06728e-05	371	371
ZBTB4	0.247051	1.45469e-06	1.07096e-05	371	371
OBFC2A	0.247046	1.4555e-06	1.07117e-05	371	371
MMP16	0.247026	1.45836e-06	1.07287e-05	371	296
LOC147804	0.247014	1.4601e-06	1.07376e-05	371	371
VPS4B	0.246998	1.46256e-06	1.07516e-05	371	371
PMCH	0.246994	1.46309e-06	1.07516e-05	371	214
STIL	0.24698	1.46522e-06	1.07554e-05	371	371
RCC2	0.246971	1.46648e-06	1.07567e-05	371	371
GTPBP2	0.24693	1.47261e-06	1.07937e-05	371	371
ADAM12	0.246911	1.47534e-06	1.08097e-05	371	369
PPT1	0.246877	1.48047e-06	1.08394e-05	371	371
CCDC41	0.246861	1.4828e-06	1.08525e-05	371	371
SLC16A6	0.246773	1.49602e-06	1.09449e-05	371	363
LAMC2	0.246767	1.49695e-06	1.09449e-05	371	357
WDFY3	0.246766	1.49708e-06	1.09449e-05	371	371
STAMBPL1	0.246756	1.49863e-06	1.09522e-05	371	371
PSME3	0.246749	1.4997e-06	1.0956e-05	371	371
SUDS3	0.24674	1.50105e-06	1.09579e-05	371	371
ZNF804A	0.246729	1.5027e-06	1.09658e-05	371	312
CEP192	0.246699	1.5072e-06	1.09915e-05	371	371
TNFSF8	0.246692	1.50827e-06	1.09944e-05	371	355
TNIK	0.246664	1.5126e-06	1.10098e-05	371	370
TNFRSF11A	0.246659	1.51328e-06	1.10108e-05	371	369
INCENP	0.246602	1.52196e-06	1.10699e-05	371	371
PLK4	0.246561	1.52838e-06	1.11126e-05	371	371
HNRNPH3	0.246551	1.52981e-06	1.11189e-05	371	371
MYSM1	0.24654	1.53162e-06	1.1128e-05	371	371
DNAJC18	0.246371	1.55784e-06	1.12978e-05	371	371
FAM49A	0.246362	1.55928e-06	1.13042e-05	371	371
DYX1C1	0.246183	1.58757e-06	1.14968e-05	371	329
RFC3	0.246092	1.60214e-06	1.1598e-05	371	371
PCYOX1L	0.246071	1.60551e-06	1.16182e-05	371	371
LRPPRC	0.246064	1.60659e-06	1.16218e-05	371	371
CDH11	0.246018	1.61403e-06	1.16714e-05	371	371
COL4A5	0.246001	1.6168e-06	1.16872e-05	371	364
SNHG4	0.245988	1.619e-06	1.16968e-05	371	321
HS2ST1	0.245986	1.6193e-06	1.16968e-05	371	371
MGAT4A	0.245929	1.62852e-06	1.17548e-05	371	371
RINT1	0.245916	1.63069e-06	1.17662e-05	371	371
SERAC1	0.24584	1.6431e-06	1.18515e-05	371	371
GPC4	0.245785	1.65231e-06	1.1905e-05	371	369
ITPR1	0.24572	1.663e-06	1.19777e-05	371	371
ADCY3	0.245646	1.67543e-06	1.20529e-05	371	371
ZNF280B	0.245643	1.67587e-06	1.20529e-05	371	324
ZNF221	0.245465	1.70605e-06	1.22567e-05	371	365
ZNF626	0.245432	1.71177e-06	1.22934e-05	371	369
RABGAP1L	0.24538	1.7206e-06	1.23524e-05	371	371
RAP2A	0.24537	1.72247e-06	1.23613e-05	371	371
MEMO1	0.24534	1.72765e-06	1.2394e-05	371	371
NIPA1	0.245114	1.7671e-06	1.26634e-05	371	371
PBK	0.245075	1.77401e-06	1.27038e-05	371	371
NUDT21	0.245037	1.78078e-06	1.27431e-05	371	371
UGCG	0.245027	1.78246e-06	1.27505e-05	371	370
PHF20	0.245004	1.78663e-06	1.27712e-05	371	371
GPR115	0.244748	1.83297e-06	1.3093e-05	371	132
PABPC5	0.244641	1.85266e-06	1.32242e-05	371	330
IFI16	0.244605	1.8593e-06	1.32621e-05	371	371
ARMCX6	0.24455	1.8695e-06	1.33157e-05	371	371
PRKX	0.244504	1.878e-06	1.33668e-05	371	371
KIAA1009	0.244489	1.88088e-06	1.33825e-05	371	371
BEND3	0.244383	1.90085e-06	1.35101e-05	371	371
YIPF5	0.244379	1.90161e-06	1.35106e-05	371	371
ZNF585A	0.244335	1.91004e-06	1.35657e-05	371	370
RNF6	0.24432	1.91277e-06	1.35802e-05	371	371
MBOAT4	0.244298	1.91712e-06	1.36063e-05	371	345
LIMS3	0.244214	1.93321e-06	1.37073e-05	371	270
ARMCX3	0.244211	1.93374e-06	1.37073e-05	371	371
ZNF83	0.244209	1.93411e-06	1.37073e-05	371	371
COQ10B	0.244183	1.93905e-06	1.37375e-05	371	371
ZNF844	0.244174	1.94087e-06	1.37455e-05	371	370
EXD2	0.244126	1.95015e-06	1.38063e-05	371	371
FAM161A	0.244119	1.95151e-06	1.3811e-05	371	370
C12orf49	0.244087	1.95767e-06	1.38497e-05	371	371
ARFGEF1	0.244068	1.9614e-06	1.38701e-05	371	371
PCDHGB5	0.244043	1.96642e-06	1.38968e-05	371	356
GORASP2	0.244039	1.96713e-06	1.38968e-05	371	371
XPO5	0.244026	1.96966e-06	1.39098e-05	371	371
ZCCHC2	0.243917	1.99115e-06	1.40516e-05	371	371
PIK3CG	0.243842	2.00616e-06	1.41435e-05	371	371
APPL2	0.243841	2.0063e-06	1.41435e-05	371	371
CCT5	0.24377	2.02056e-06	1.4239e-05	371	371
DRP2	0.243693	2.03598e-06	1.43375e-05	371	257
UVRAG	0.243688	2.0371e-06	1.43404e-05	371	371
DENND4A	0.243649	2.04489e-06	1.43901e-05	371	371
DMXL2	0.243587	2.05759e-06	1.44743e-05	371	371
SERPINH1	0.243544	2.06639e-06	1.45261e-05	371	371
GSR	0.243542	2.0669e-06	1.45261e-05	371	371
CCDC39	0.243538	2.06758e-06	1.45261e-05	371	345
RAB1A	0.2435	2.07543e-06	1.4569e-05	371	371
MID1	0.243488	2.07795e-06	1.45815e-05	371	371
ZNF543	0.243437	2.08851e-06	1.46479e-05	371	371
CCDC132	0.243426	2.09084e-06	1.46564e-05	371	371
PAPPA	0.243382	2.09985e-06	1.47144e-05	371	362
PAG1	0.243364	2.10369e-06	1.47269e-05	371	371
BACE2	0.243363	2.10385e-06	1.47269e-05	371	371
USP37	0.243358	2.10496e-06	1.47295e-05	371	371
SNORD1C	0.24332	2.11295e-06	1.47803e-05	371	356
IFT81	0.243292	2.1188e-06	1.48108e-05	371	371
POLD3	0.243279	2.12153e-06	1.48246e-05	371	371
RHOA	0.243259	2.12563e-06	1.48454e-05	371	371
ZNF471	0.243258	2.12599e-06	1.48454e-05	371	363
PRKAR2B	0.243213	2.13545e-06	1.49062e-05	371	365
PHACTR1	0.243208	2.13641e-06	1.49077e-05	371	368
ACTN1	0.243164	2.14577e-06	1.49678e-05	371	371
NR2C2	0.243157	2.14724e-06	1.49728e-05	371	371
FAM54A	0.24309	2.16162e-06	1.50678e-05	371	370
PXK	0.243036	2.17323e-06	1.51329e-05	371	371
PIP5K1A	0.242918	2.19886e-06	1.5306e-05	371	371
NSUN3	0.242887	2.20548e-06	1.53413e-05	371	371
EMB	0.242874	2.20843e-06	1.53565e-05	371	371
CSRNP3	0.242841	2.21555e-06	1.53991e-05	371	229
DNAJC24	0.242839	2.21611e-06	1.53991e-05	371	371
ODF2	0.242754	2.23472e-06	1.5523e-05	371	371
ZNF45	0.242707	2.24514e-06	1.55737e-05	371	371
UBTD2	0.242702	2.24635e-06	1.55767e-05	371	371
BTN2A1	0.242646	2.25872e-06	1.5657e-05	371	371
PSME4	0.242622	2.26407e-06	1.56886e-05	371	371
SLC38A1	0.24251	2.28933e-06	1.58581e-05	371	371
ZCCHC7	0.242498	2.29218e-06	1.58724e-05	371	371
UBAP2L	0.242351	2.32565e-06	1.60985e-05	371	371
EMILIN2	0.242261	2.34643e-06	1.62198e-05	371	371
ZFP112	0.242244	2.35045e-06	1.62415e-05	371	370
KCTD12	0.24224	2.3512e-06	1.62415e-05	371	371
SRGN	0.242168	2.36809e-06	1.63412e-05	371	371
GPSM2	0.242109	2.38192e-06	1.64211e-05	371	371
CREG2	0.242108	2.38213e-06	1.64211e-05	371	219
COL6A3	0.242098	2.3845e-06	1.64317e-05	371	371
C2orf29	0.242091	2.38625e-06	1.64323e-05	371	371
KIAA0247	0.242049	2.39594e-06	1.64934e-05	371	371
PBX3	0.241993	2.40925e-06	1.65793e-05	371	371
G3BP1	0.241972	2.41432e-06	1.66084e-05	371	371
PRTFDC1	0.241958	2.41773e-06	1.66261e-05	371	371
ZNF227	0.241902	2.4311e-06	1.67066e-05	371	371
CCDC43	0.241866	2.43966e-06	1.67542e-05	371	371
ZNF530	0.24172	2.47502e-06	1.6985e-05	371	371
EIF3A	0.241694	2.4813e-06	1.70222e-05	371	371
MLL3	0.241592	2.50654e-06	1.71894e-05	371	371
KITLG	0.241518	2.52484e-06	1.7297e-05	371	371
HDAC9	0.241474	2.53564e-06	1.73651e-05	371	371
NOC3L	0.241416	2.55032e-06	1.74586e-05	371	371
ACTBL2	0.241413	2.55104e-06	1.74586e-05	371	121
MLLT10	0.241385	2.55814e-06	1.74951e-05	371	371
NAP1L3	0.24133	2.57187e-06	1.7583e-05	371	351
ATP1A1	0.241302	2.57899e-06	1.76256e-05	371	371
MSN	0.241287	2.58291e-06	1.76464e-05	371	371
ZFC3H1	0.241282	2.58404e-06	1.7648e-05	371	371
COMMD8	0.241227	2.59807e-06	1.77317e-05	371	371
GLP1R	0.24116	2.61538e-06	1.78437e-05	371	170
RGPD6	0.241151	2.61761e-06	1.78528e-05	371	371
BBS12	0.241142	2.62006e-06	1.78634e-05	371	371
TAX1BP1	0.241069	2.63879e-06	1.79724e-05	371	371
NRP2	0.241066	2.63966e-06	1.79724e-05	371	371
STK38	0.241035	2.64776e-06	1.80214e-05	371	371
CXCR4	0.240879	2.68853e-06	1.82802e-05	371	371
AMIGO2	0.240825	2.70274e-06	1.83643e-05	371	371
MYEF2	0.240654	2.74844e-06	1.86557e-05	371	364
ZNF12	0.240617	2.75858e-06	1.87181e-05	371	371
TM4SF19	0.240581	2.76817e-06	1.87704e-05	371	337
EID3	0.240537	2.78018e-06	1.88454e-05	371	370
ZNF473	0.240431	2.80938e-06	1.90369e-05	371	371
NEK11	0.240346	2.83287e-06	1.91765e-05	371	371
KIF26B	0.240248	2.86018e-06	1.93548e-05	371	363
CCT8	0.240152	2.88708e-06	1.95236e-05	371	371
MAP9	0.240125	2.8948e-06	1.95691e-05	371	365
TCF7L2	0.240109	2.89919e-06	1.95921e-05	371	371
SGOL1	0.240054	2.91507e-06	1.96861e-05	371	369
PHF16	0.240035	2.9204e-06	1.97154e-05	371	371
CENPE	0.239986	2.93446e-06	1.98036e-05	371	371
GART	0.239978	2.93673e-06	1.98122e-05	371	371
VPS13A	0.239935	2.94897e-06	1.98881e-05	371	371
SUSD5	0.239908	2.95683e-06	1.99344e-05	371	347
SLC7A1	0.239904	2.95813e-06	1.99363e-05	371	371
[truncated: 17,924 more rows]
